# Supplementary material
Source: publisher figshare collection journal article supplement (https://acs.figshare.com/ndownloader/files/9264571)

## Supporting Information

### Electrophilic Triflyl-arylation and Triflyl-pyridylation by Unsymmetrical Aryl/Pyridyl- $\lambda^3$ -iodonium Salts: Synthesis of Aryl and Pyridyl Triflones

Prajwalita Das and Norio Shibata\*

*Department of Nanopharmaceutical Sciences, Nagoya Institute of Technology, Gokiso-cho, Showa-ku, Nagoya 466-8555, Japan*

[nozshiba@nitech.ac.jp](mailto:nozshiba@nitech.ac.jp)

#### Table of Contents

|                            |       |
|----------------------------|-------|
| General Procedure A–F      | S1–S2 |
| Ortep diagram of <b>1b</b> | S3    |
| NMR Spectra                | S4    |

General Procedure A:

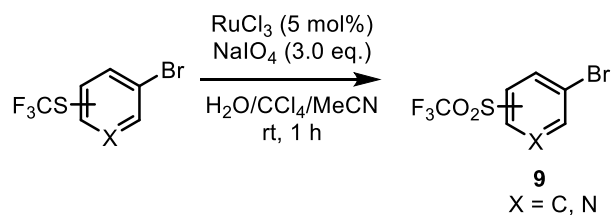

General Procedure B:

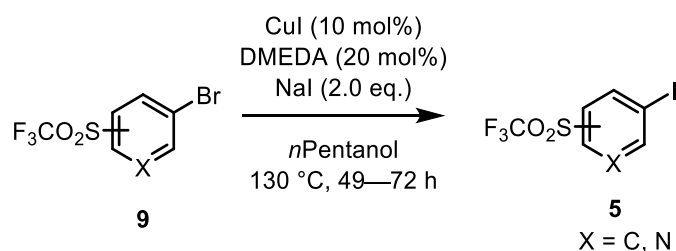

1-iodo-4-((trifluoromethyl)sulfonyl)benzene **5a**, 1-iodo-3-((trifluoromethyl)sulfonyl)benzene **5b**, 1-iodo-2-((trifluoromethyl)sulfonyl)benzene **5c**, 5-iodo-2-((trifluoromethyl)sulfonyl)pyridine **5d** were prepared from corresponding aryl bromide **9** by aromatic Finkelstein reaction. The resulting aryl iodides **5a** and **5d** were obtained after full conversion of the starting material aryl bromide. However, the reactions to obtain **5b** and **5c** didn't undergo complete conversion of the aryl bromide starting material **9**, because of which the end products contained parts of the starting material due to separation difficulties. **5b–c** were characterised by only HRMS and used in the next step without further purification.

General Procedure C:

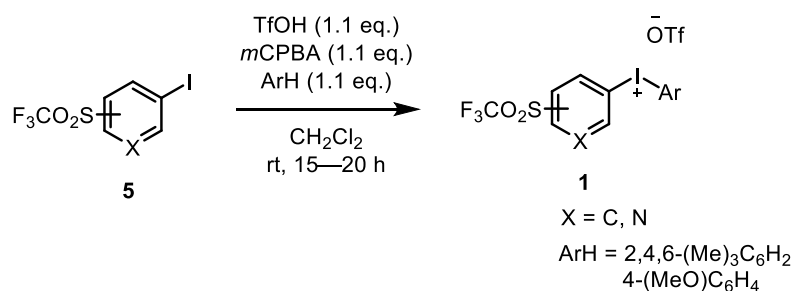

Yield for reagent **1b** and **1e** is with respect to **9b** and for **1c** and **1f** is with respect to **9c**.

General Procedure D (Method 1):

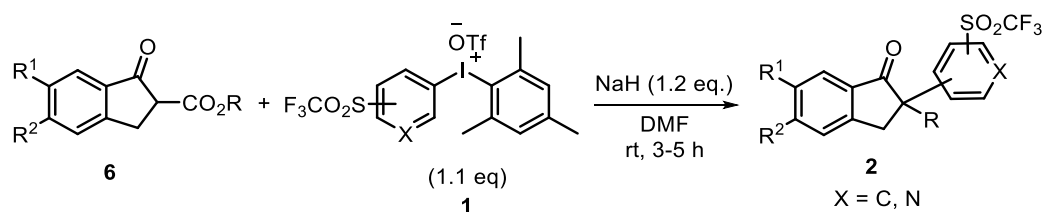

General Procedure D (Method 2):

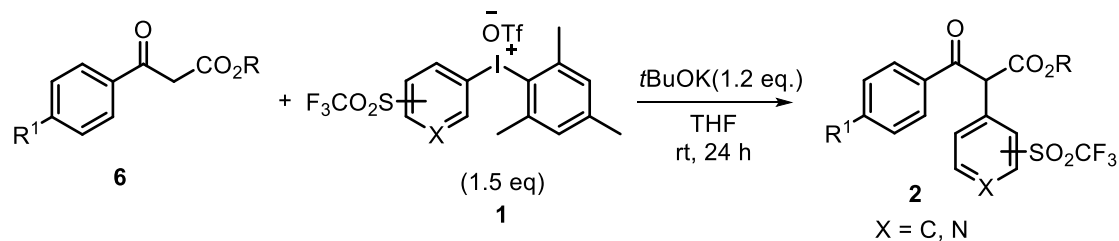

General Procedure E:

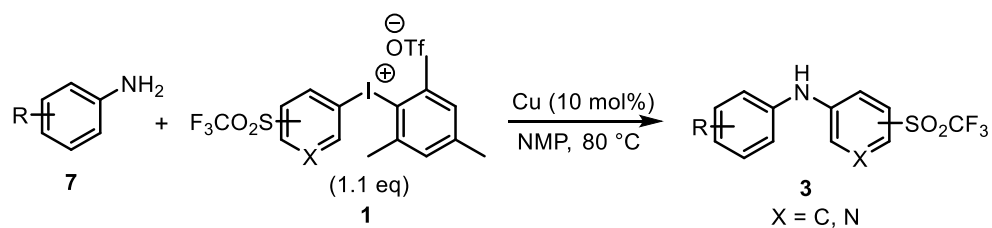

General Procedure F (Method 1):

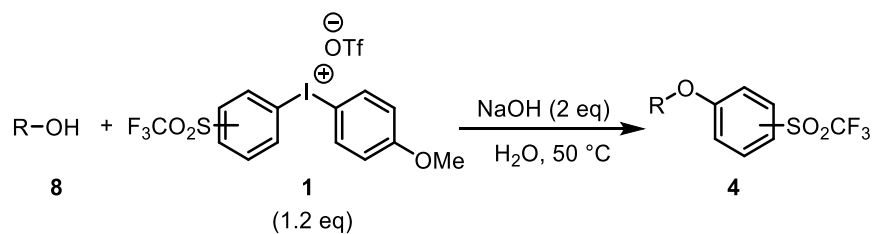

General Procedure F (Method 2):

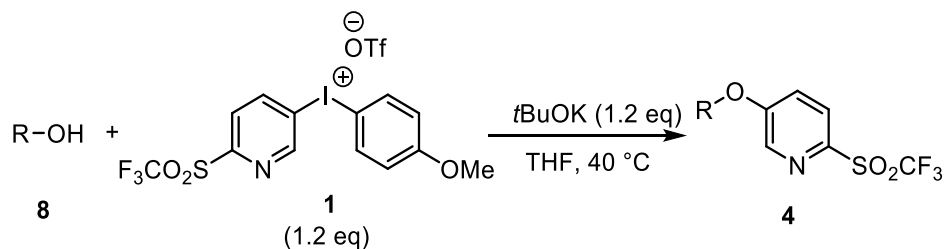

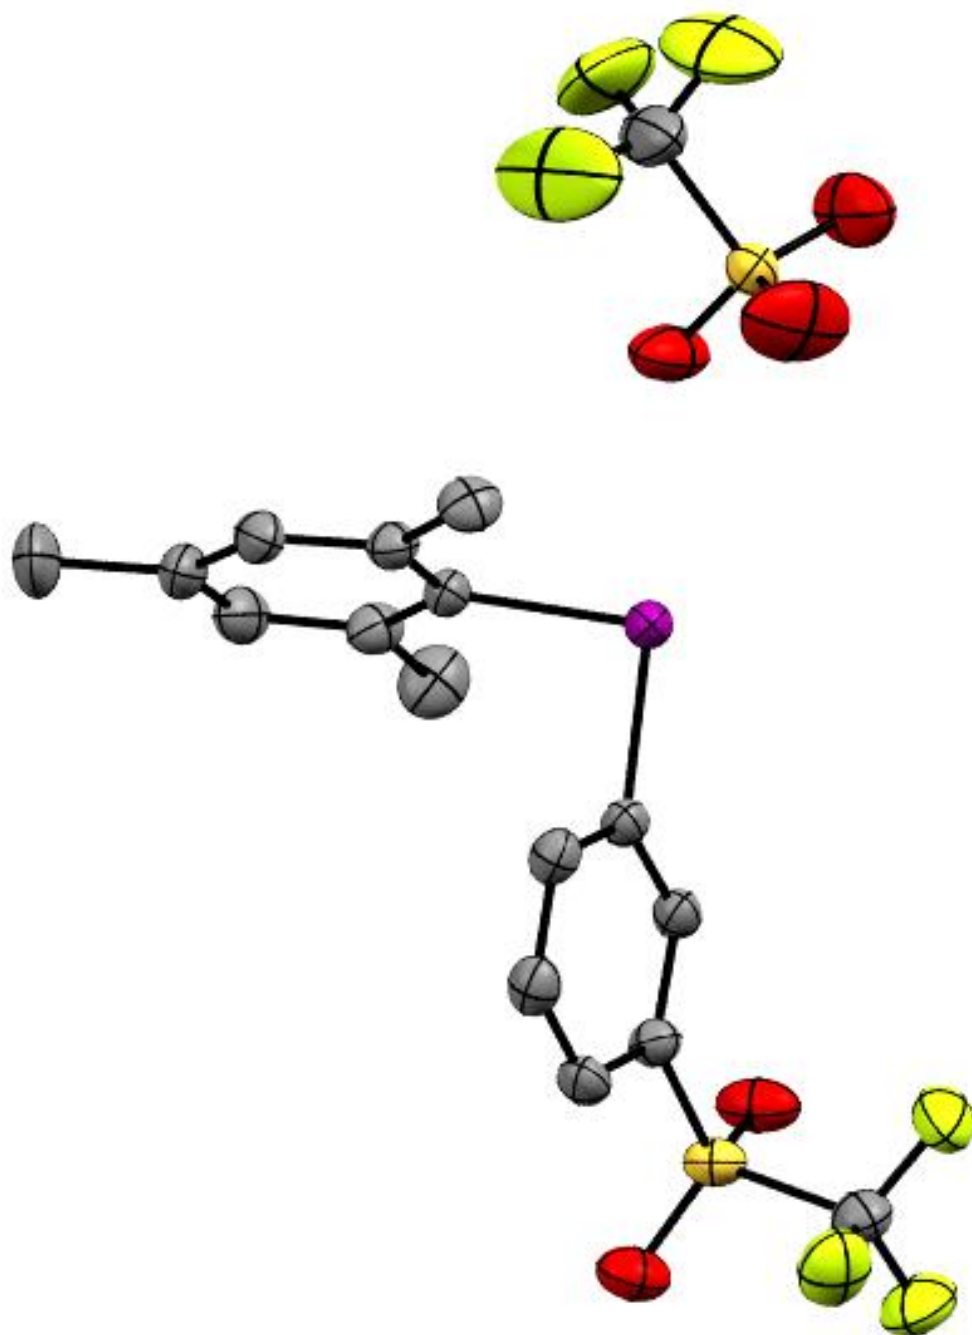

Figure 1: Ortep diagram of **1b** drawn at 50% probability. The hydrogen atoms have been omitted for clarity.

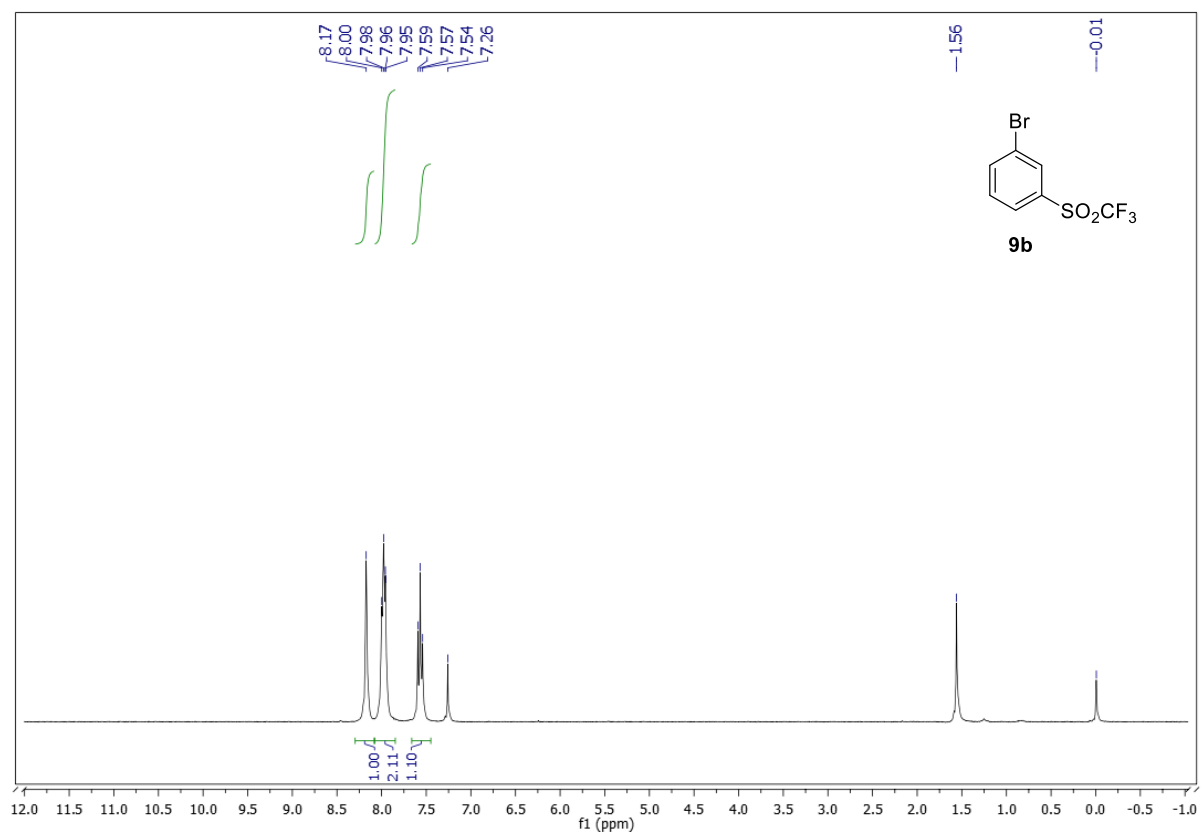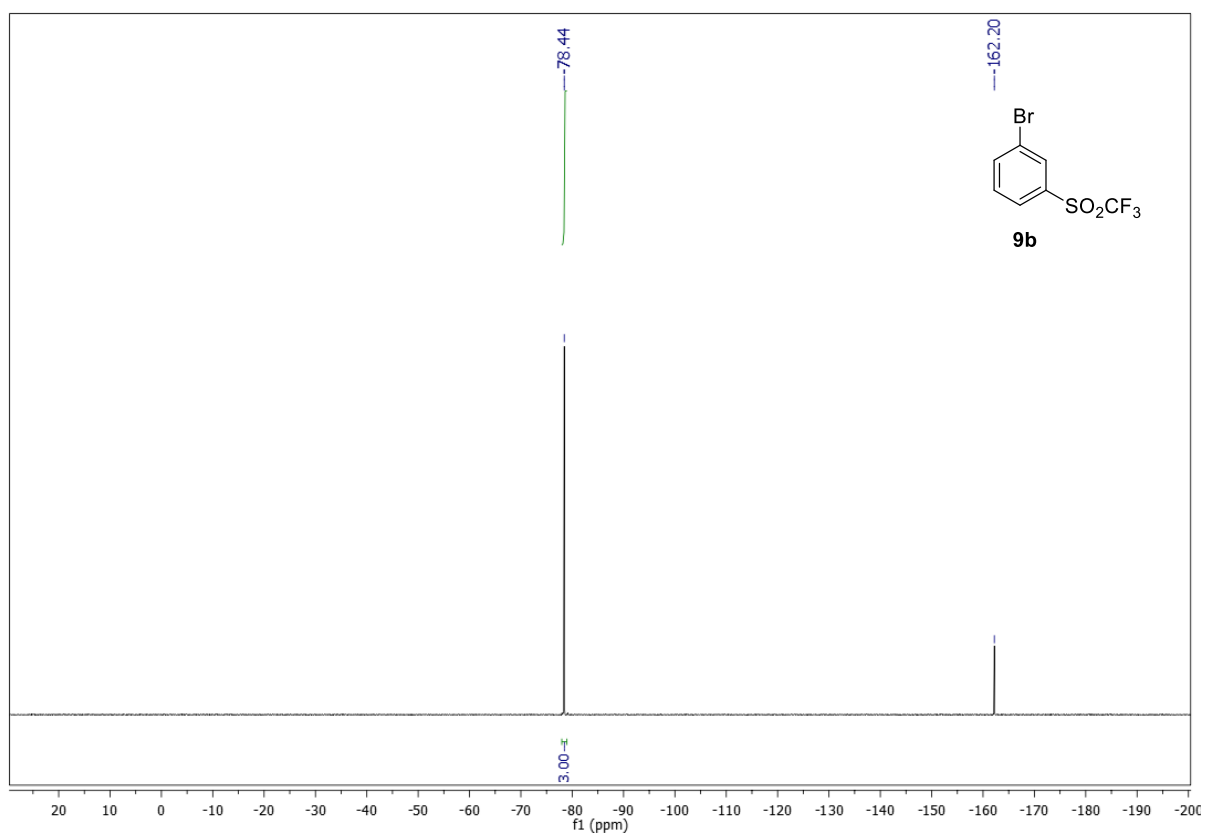

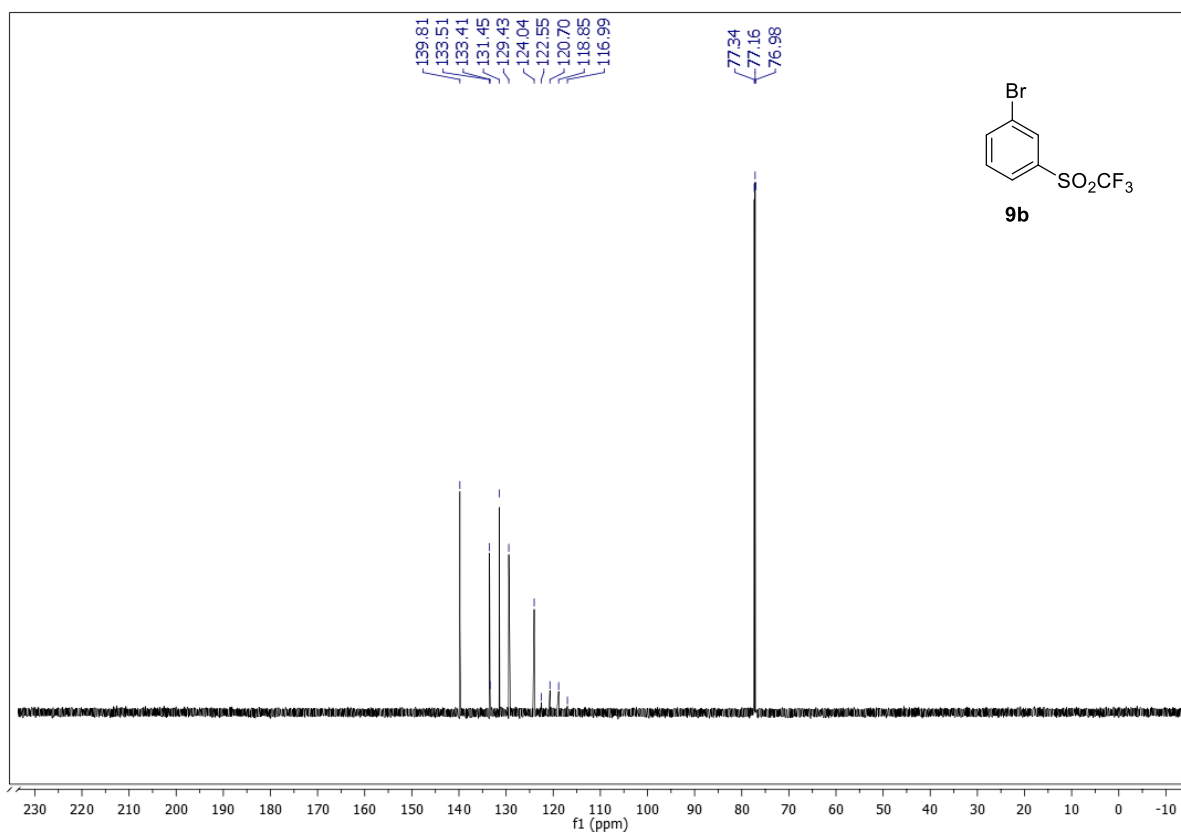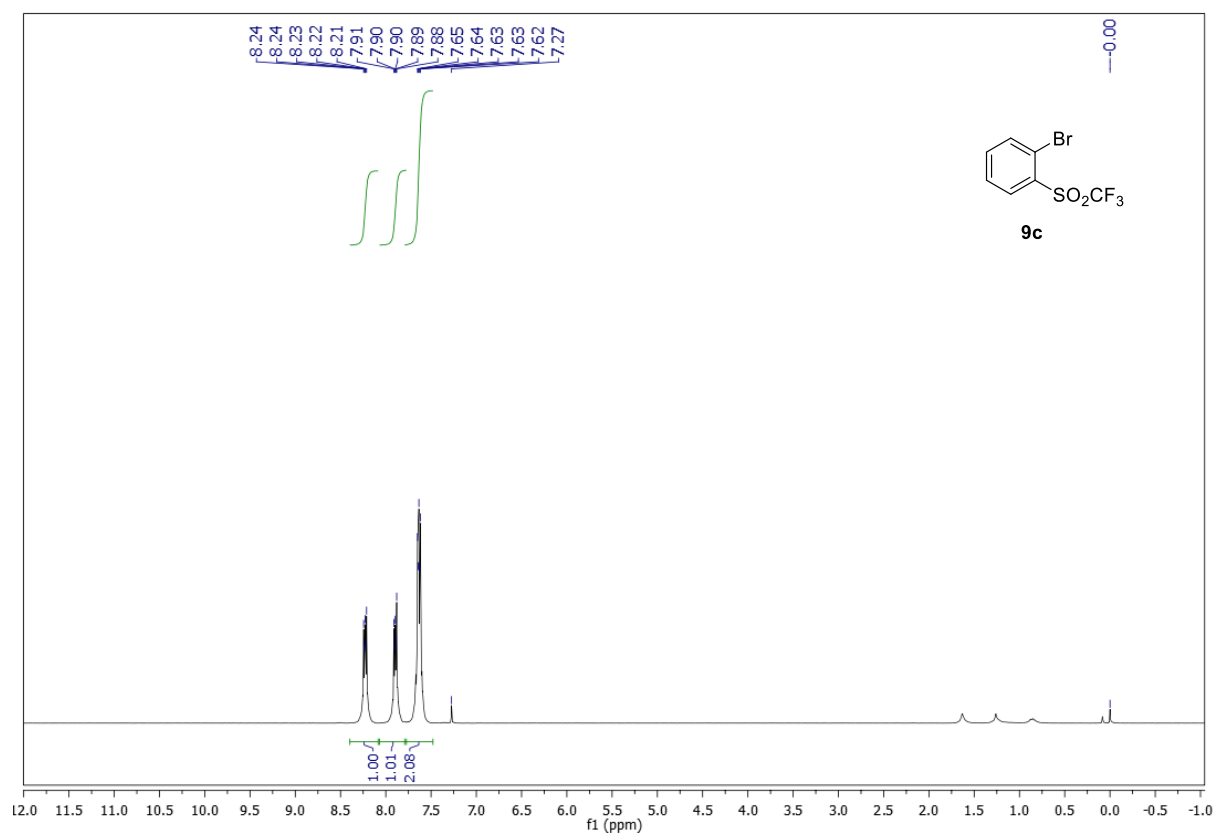

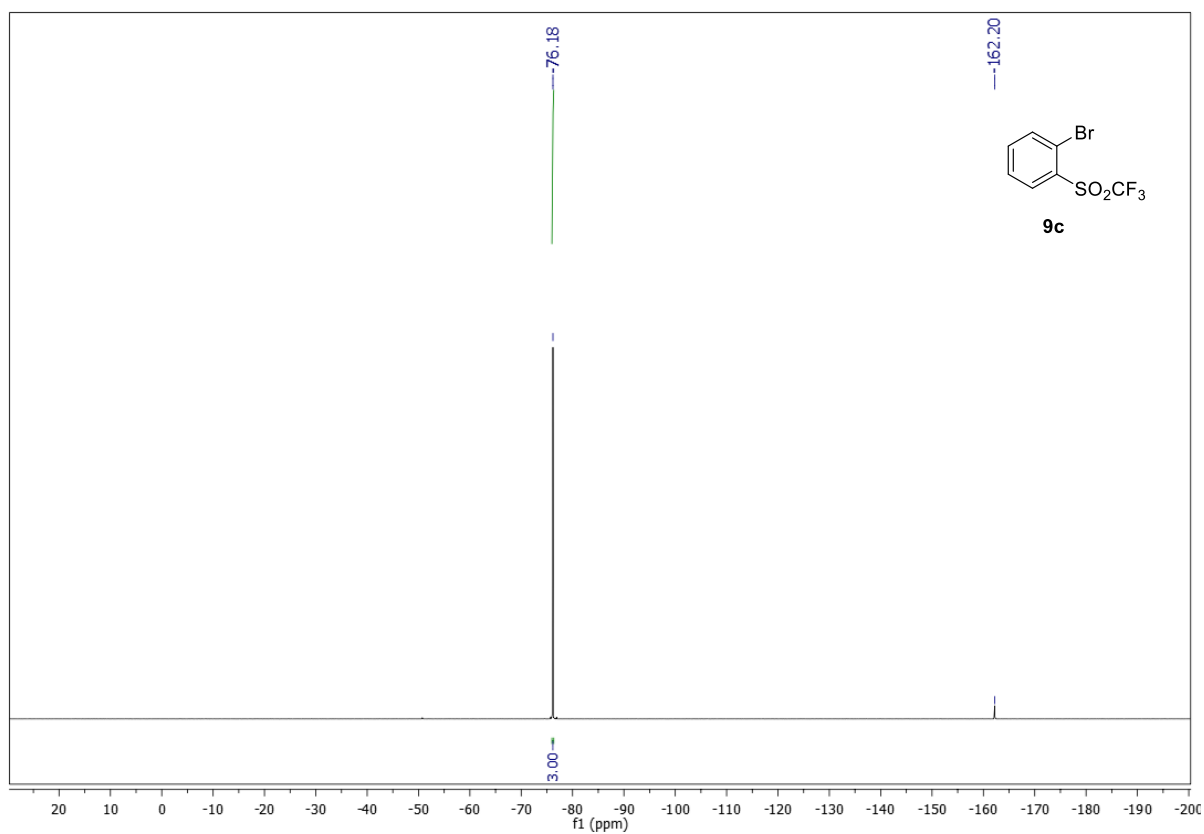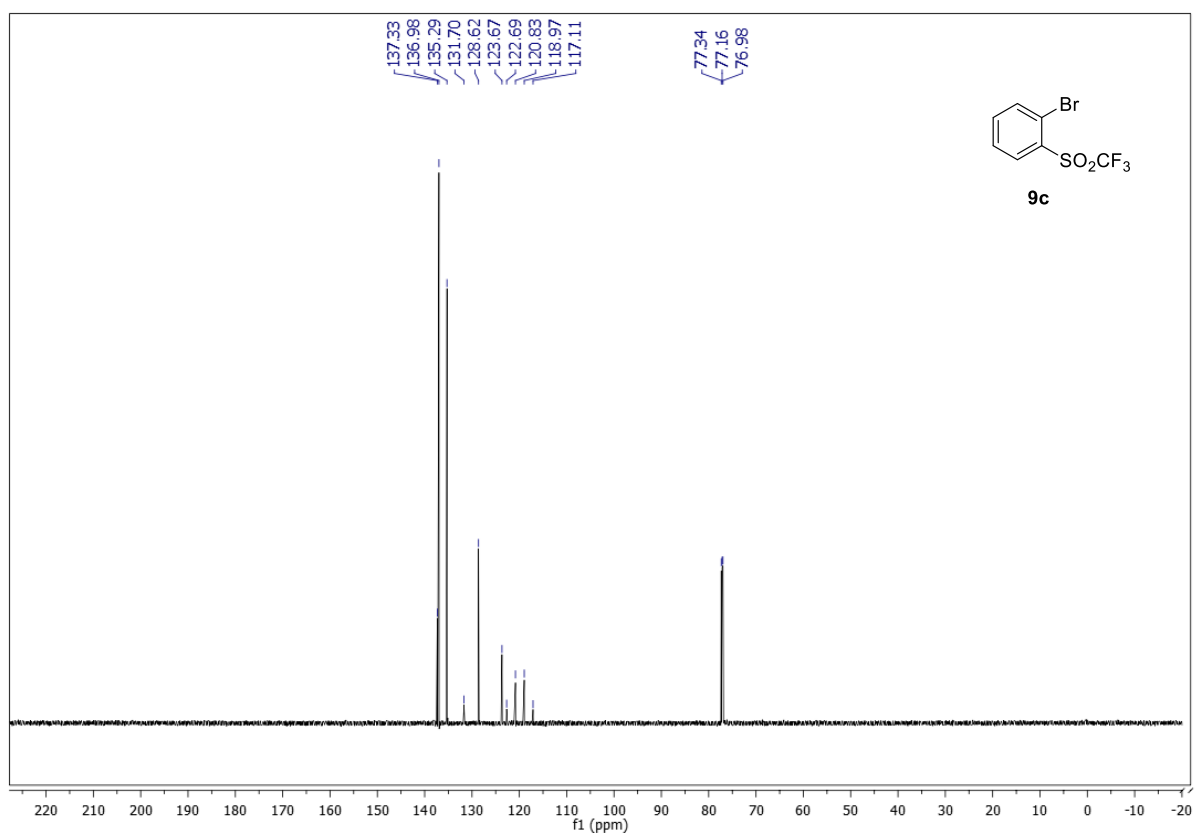

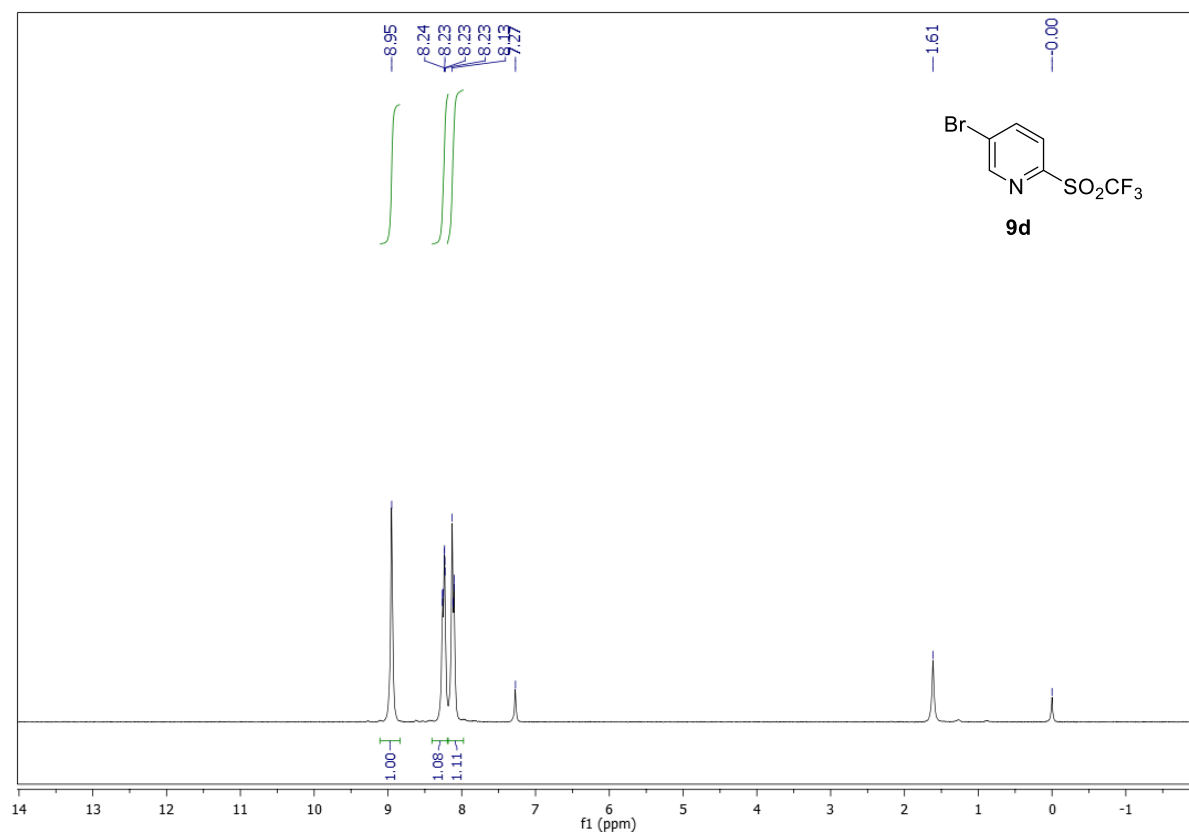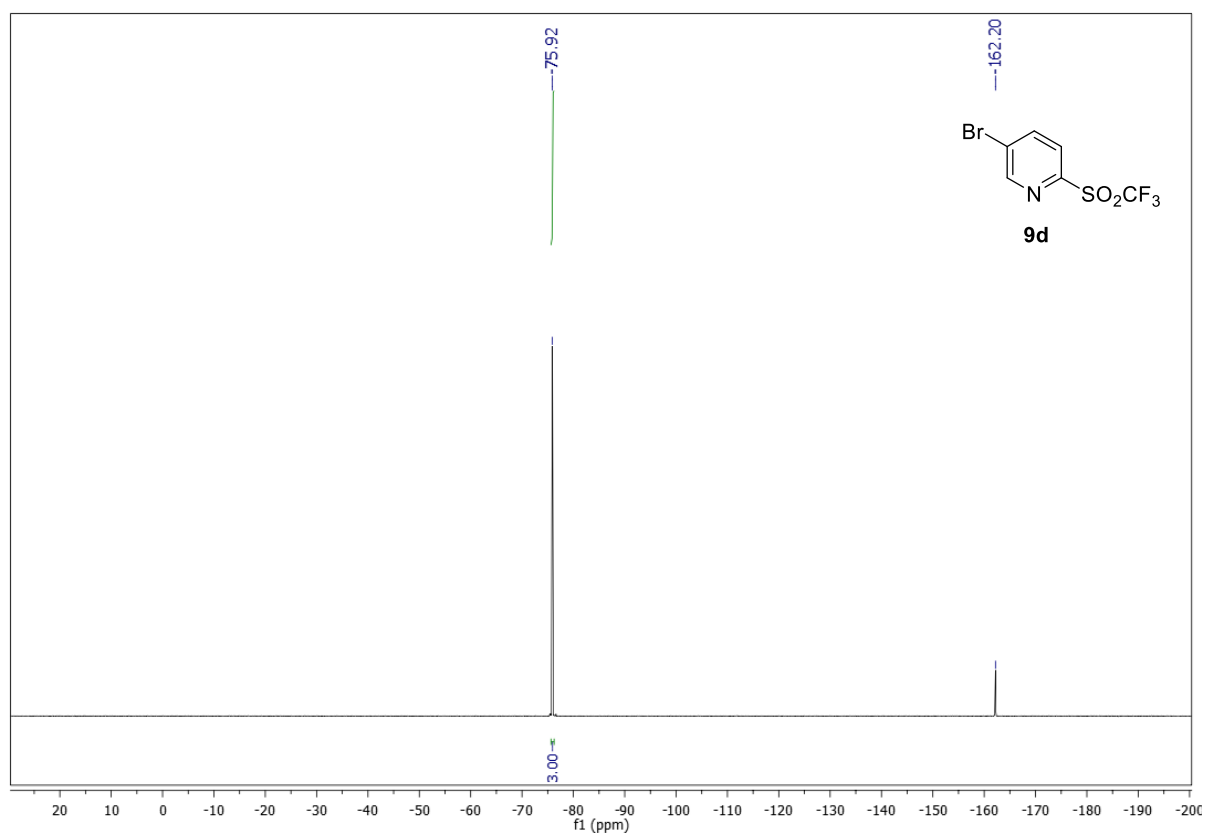



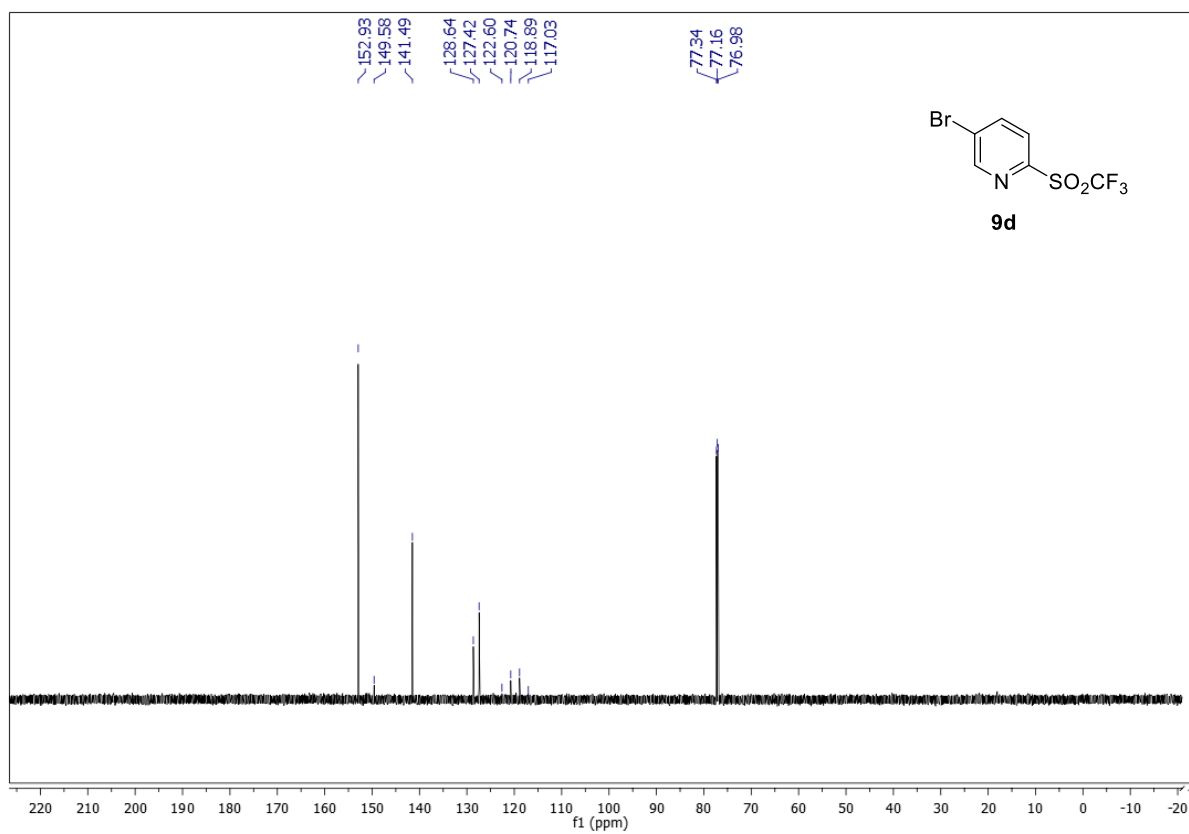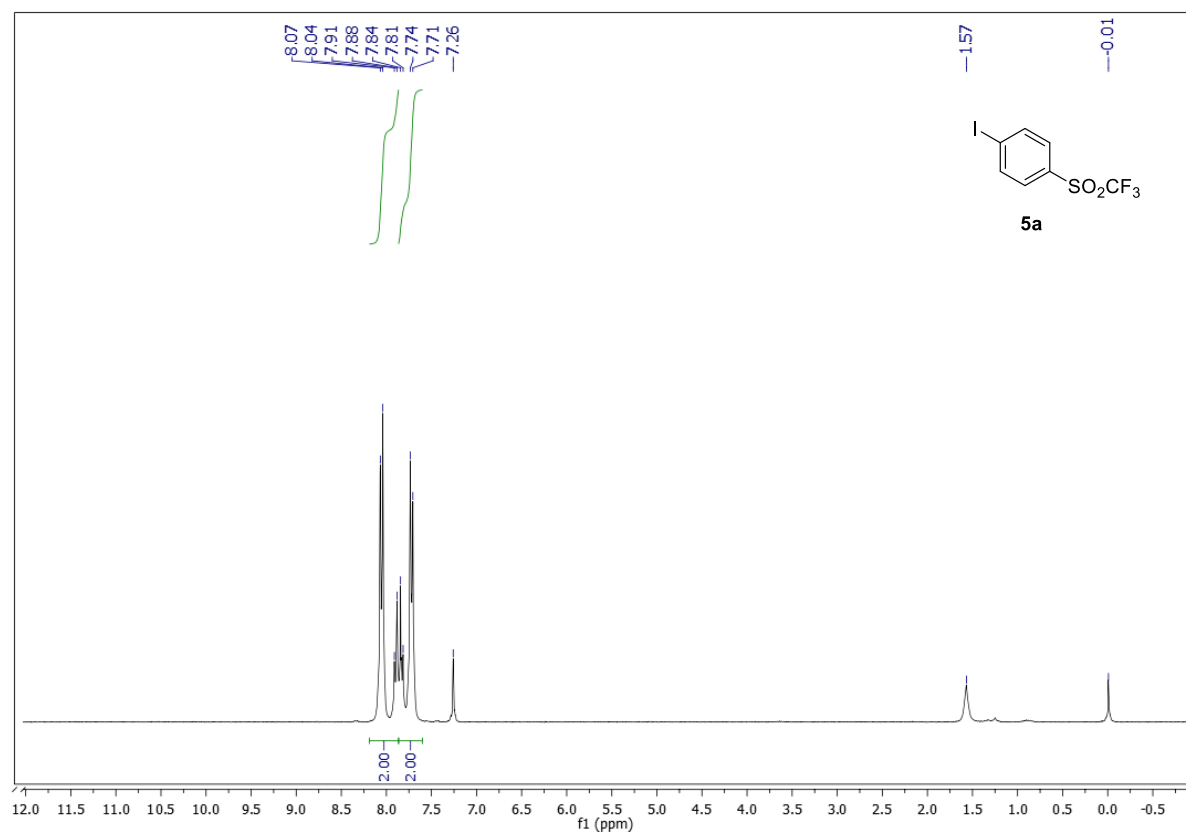

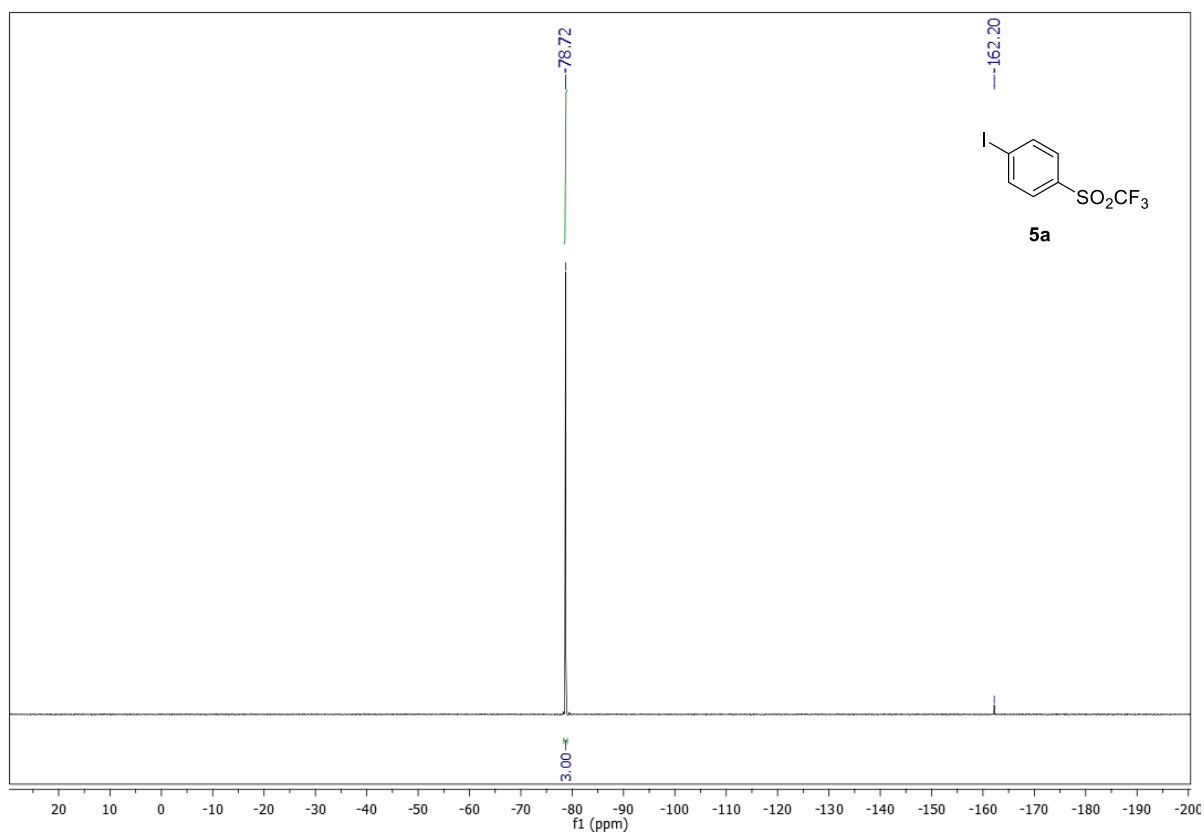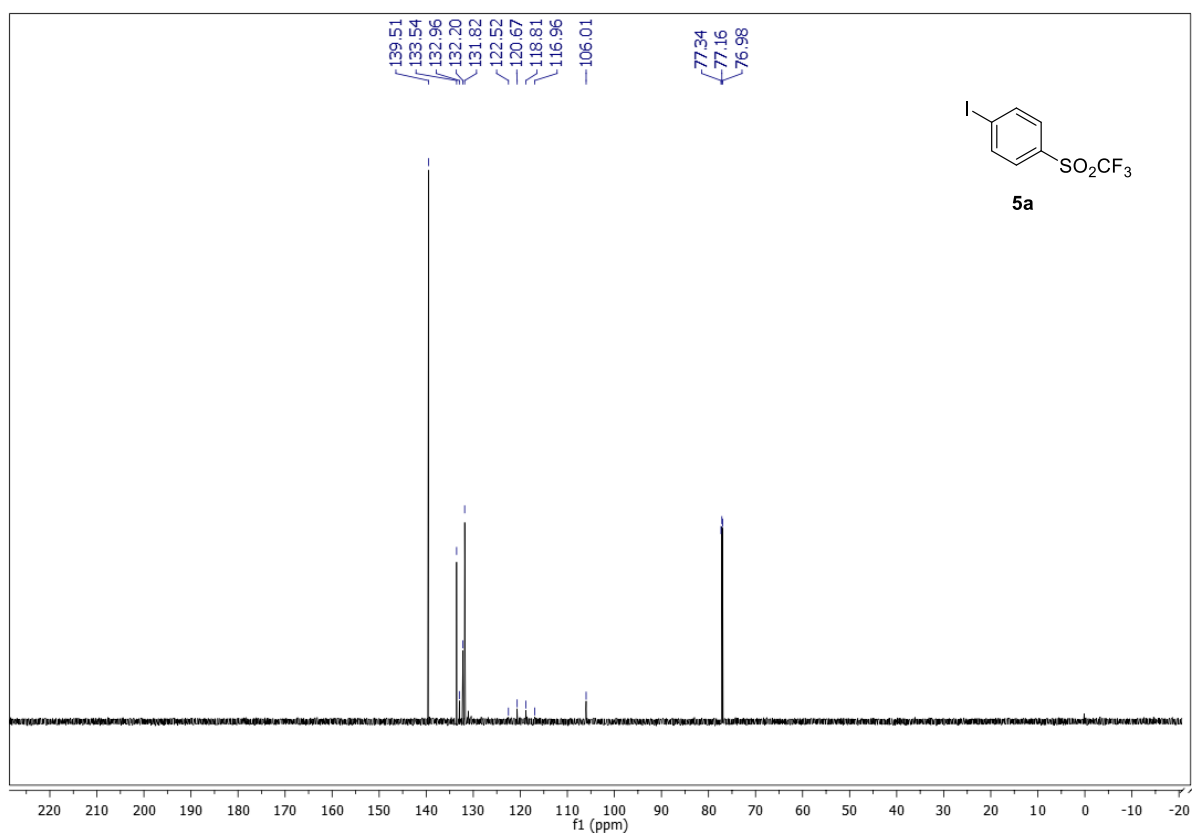

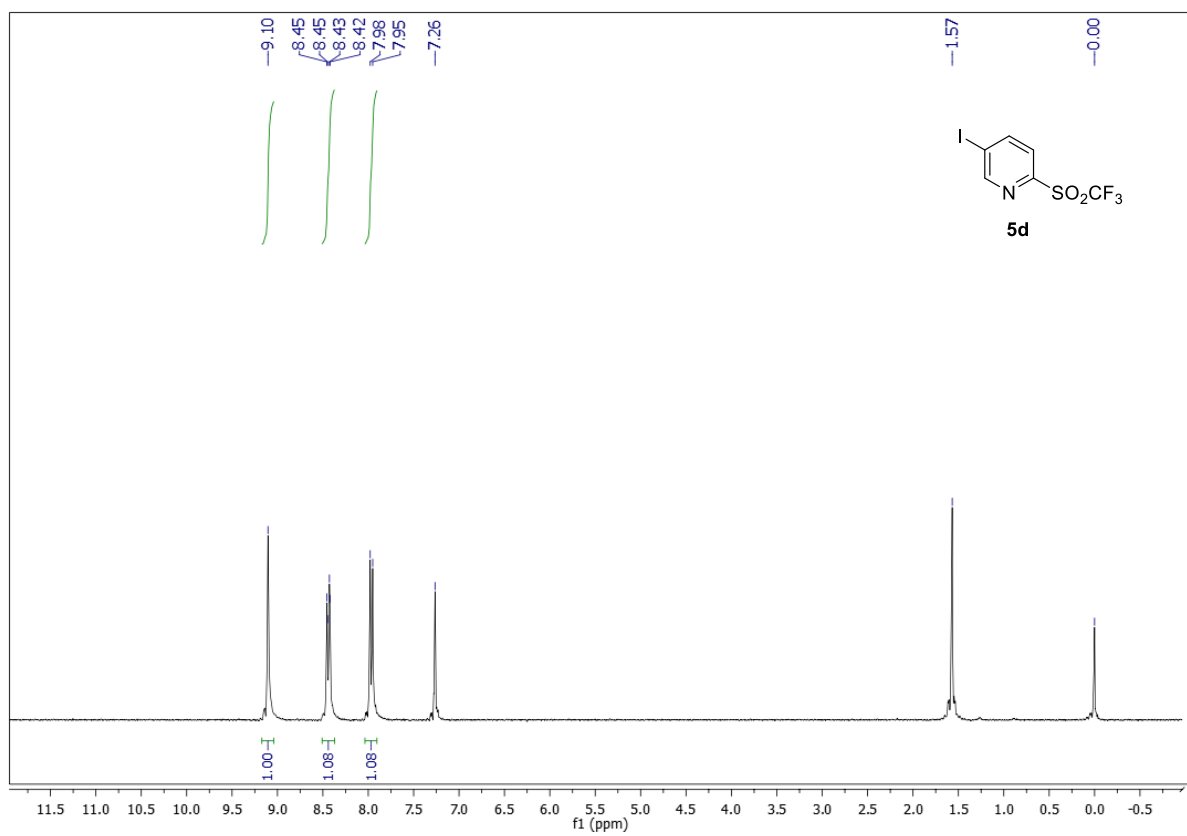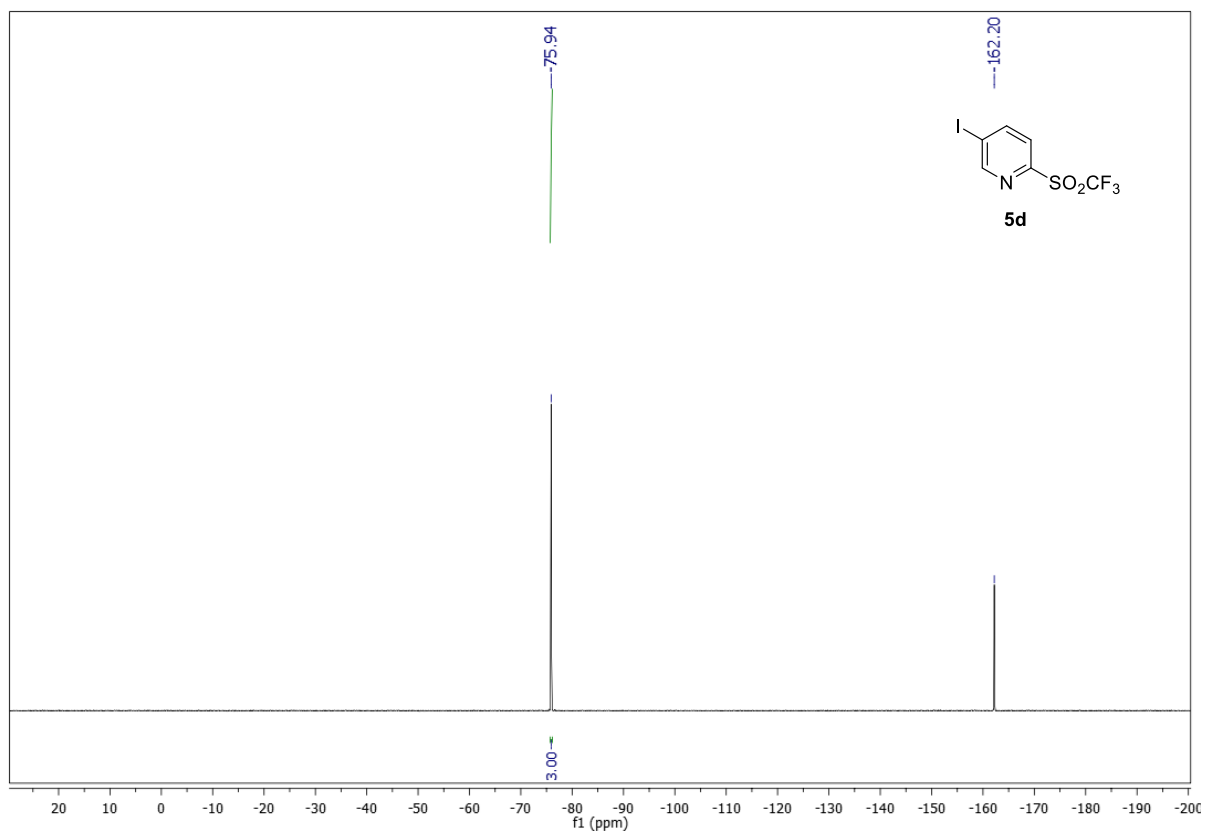

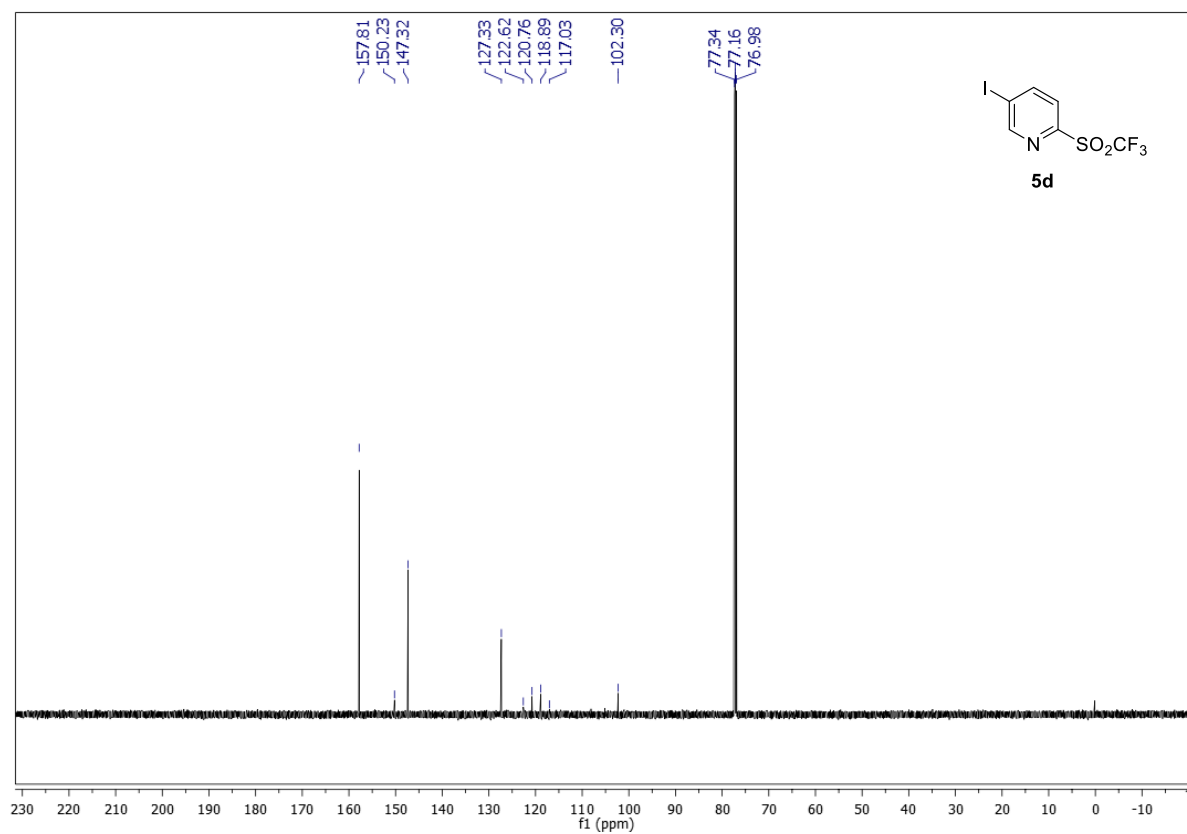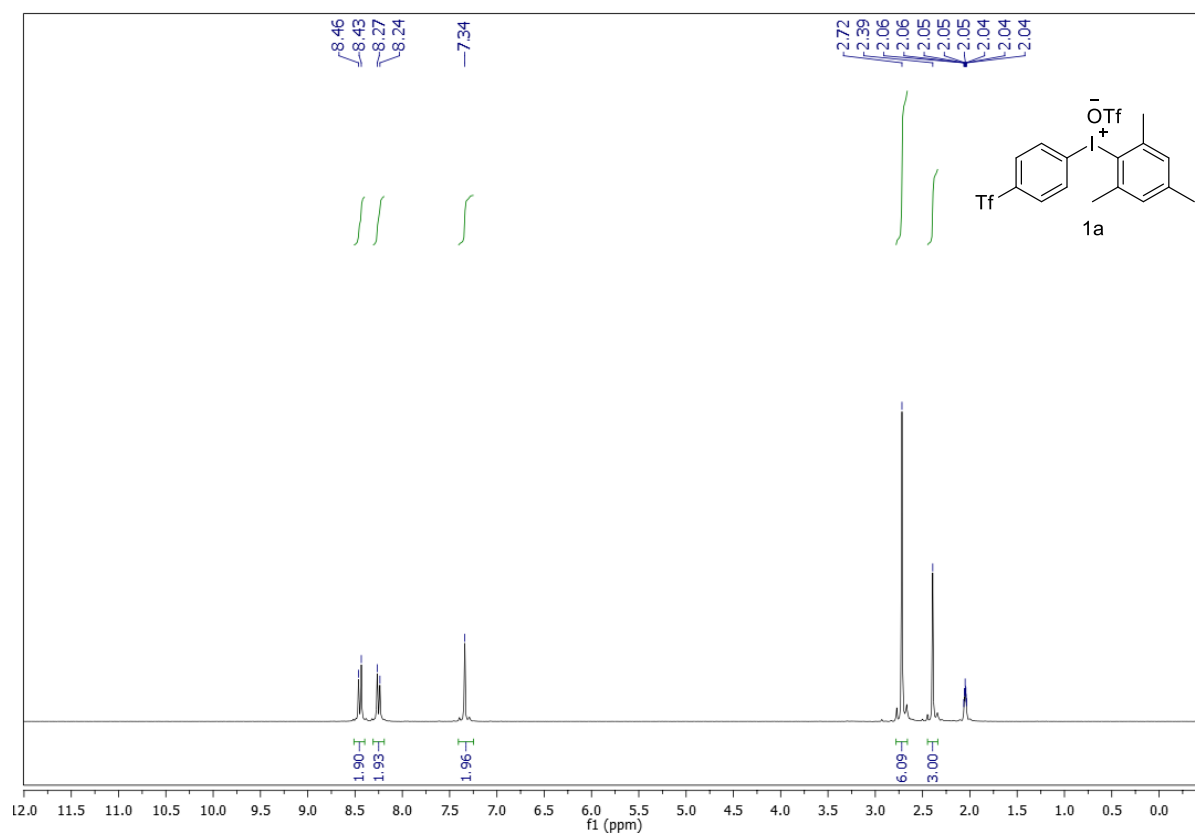

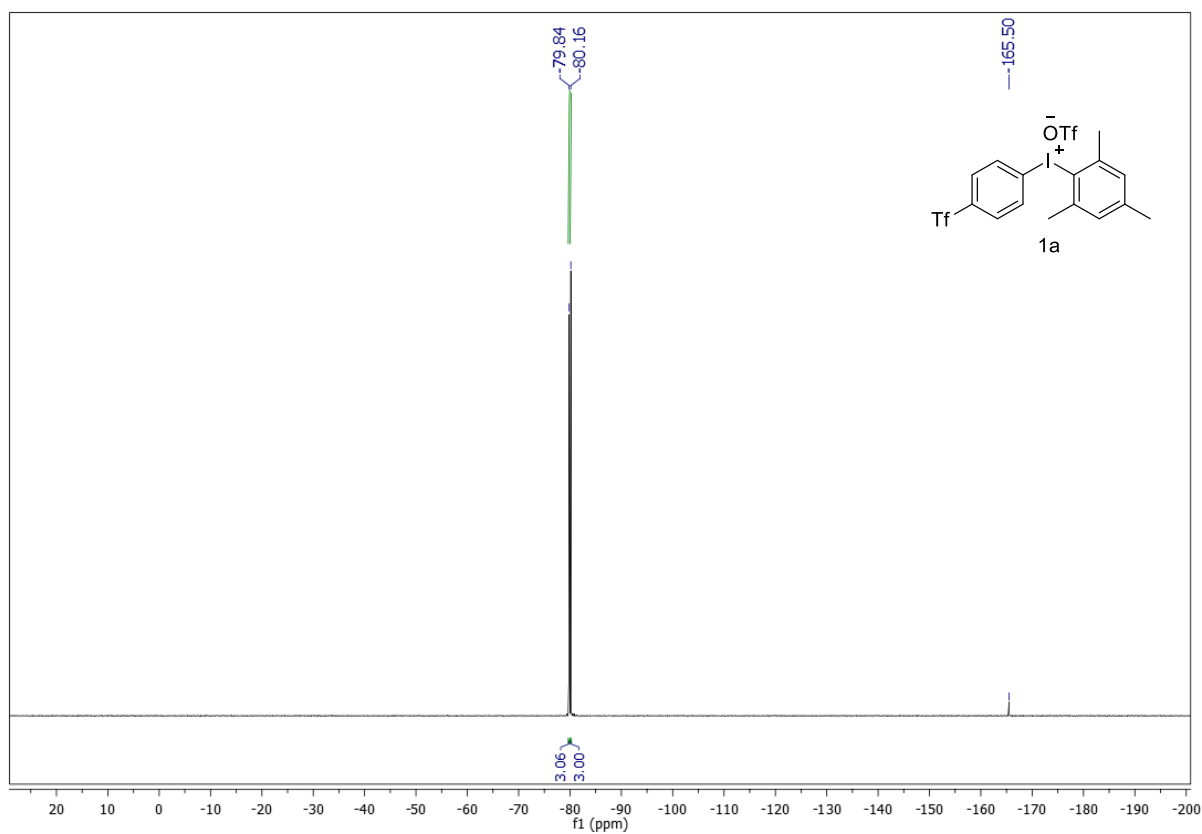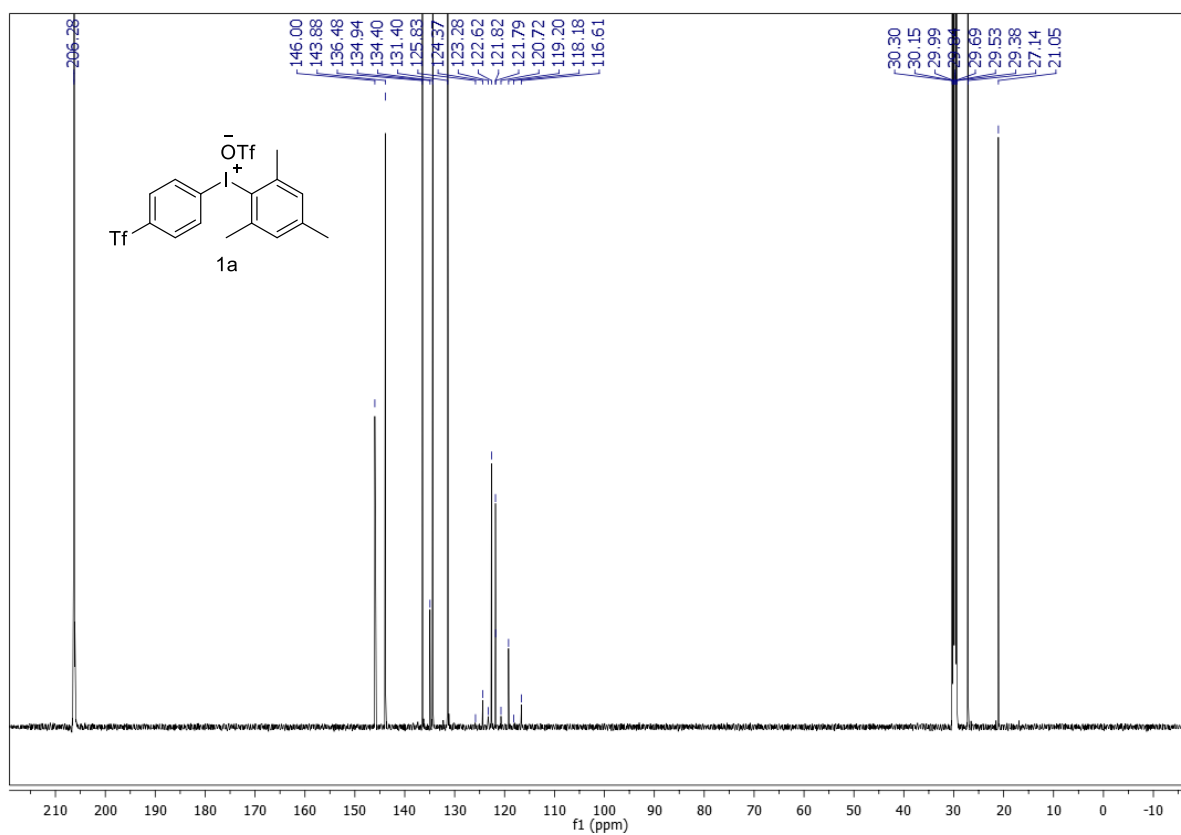

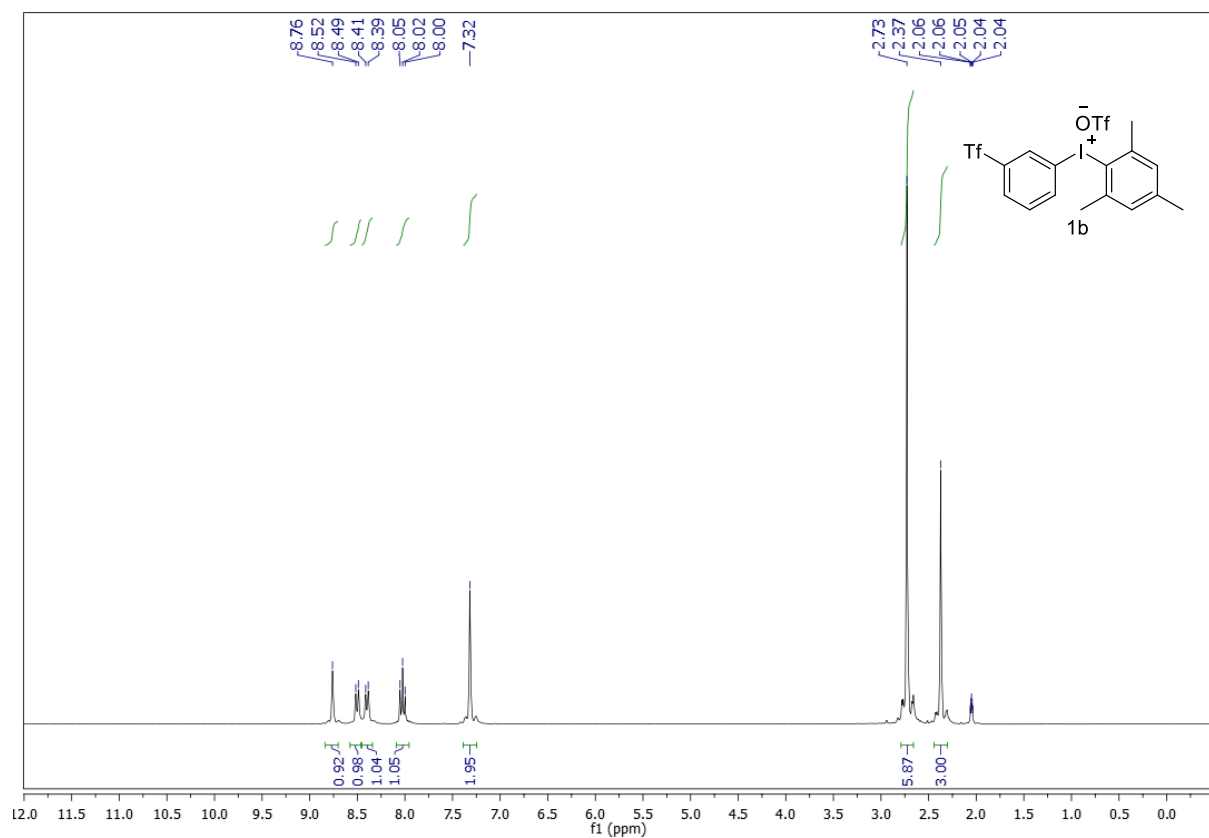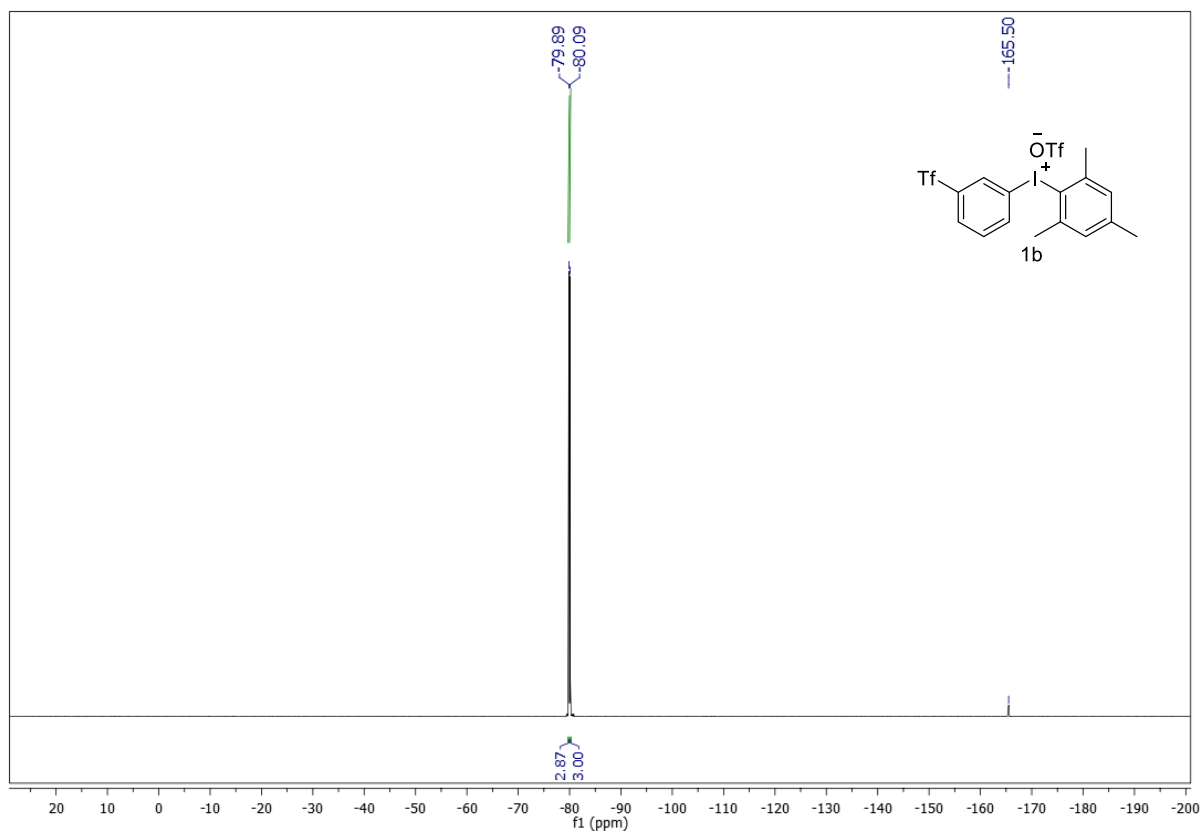

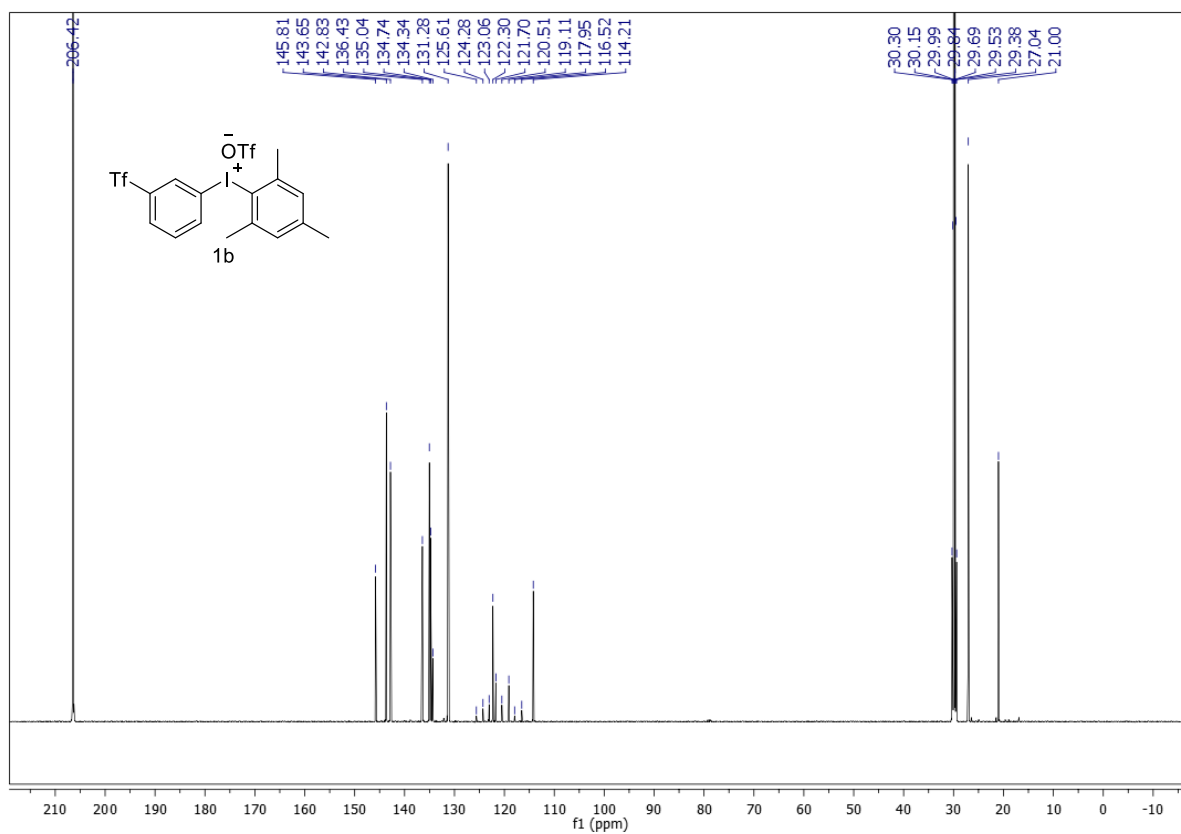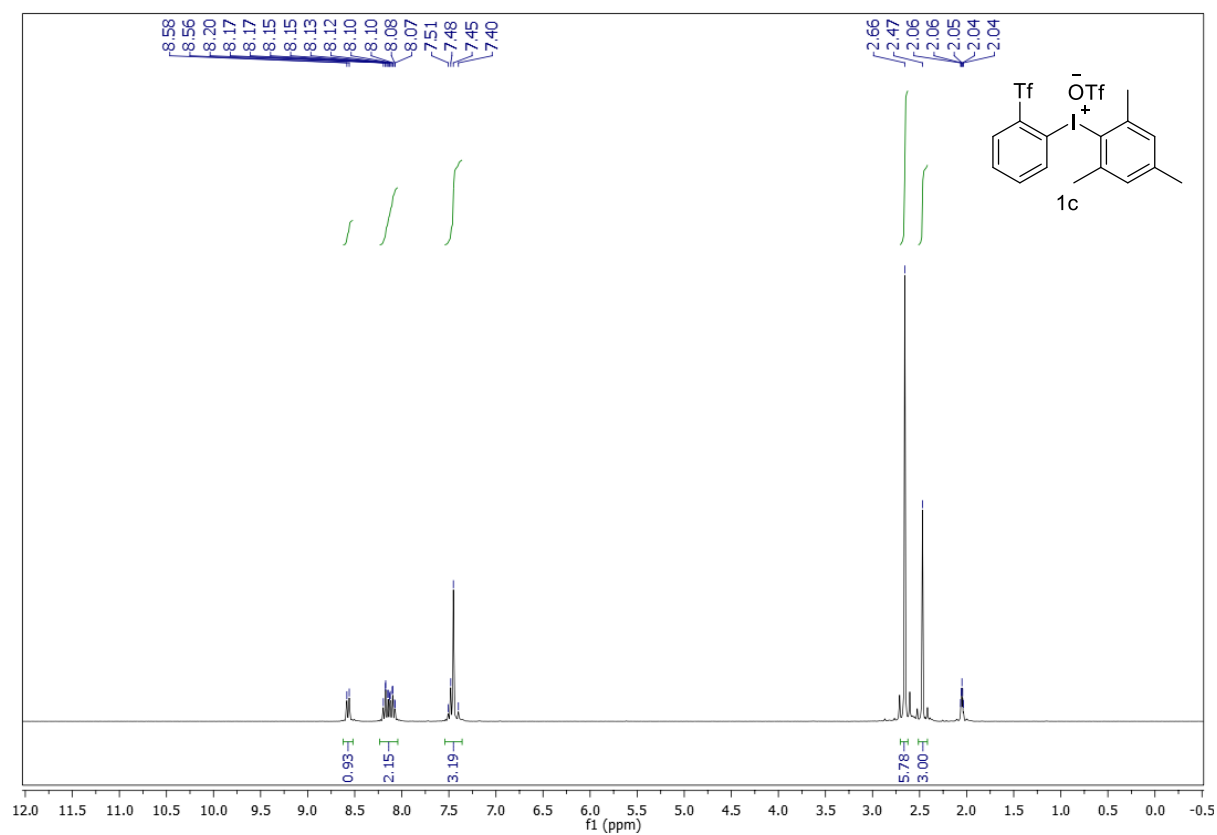

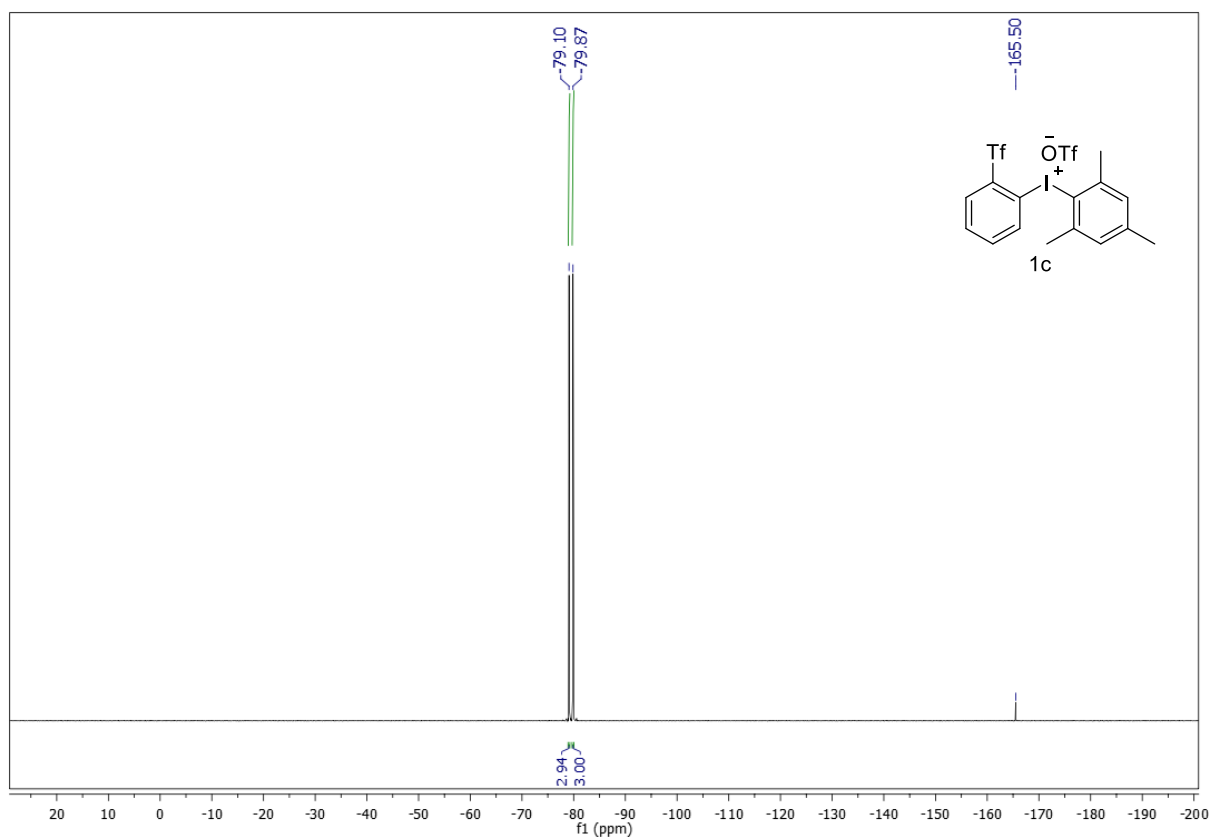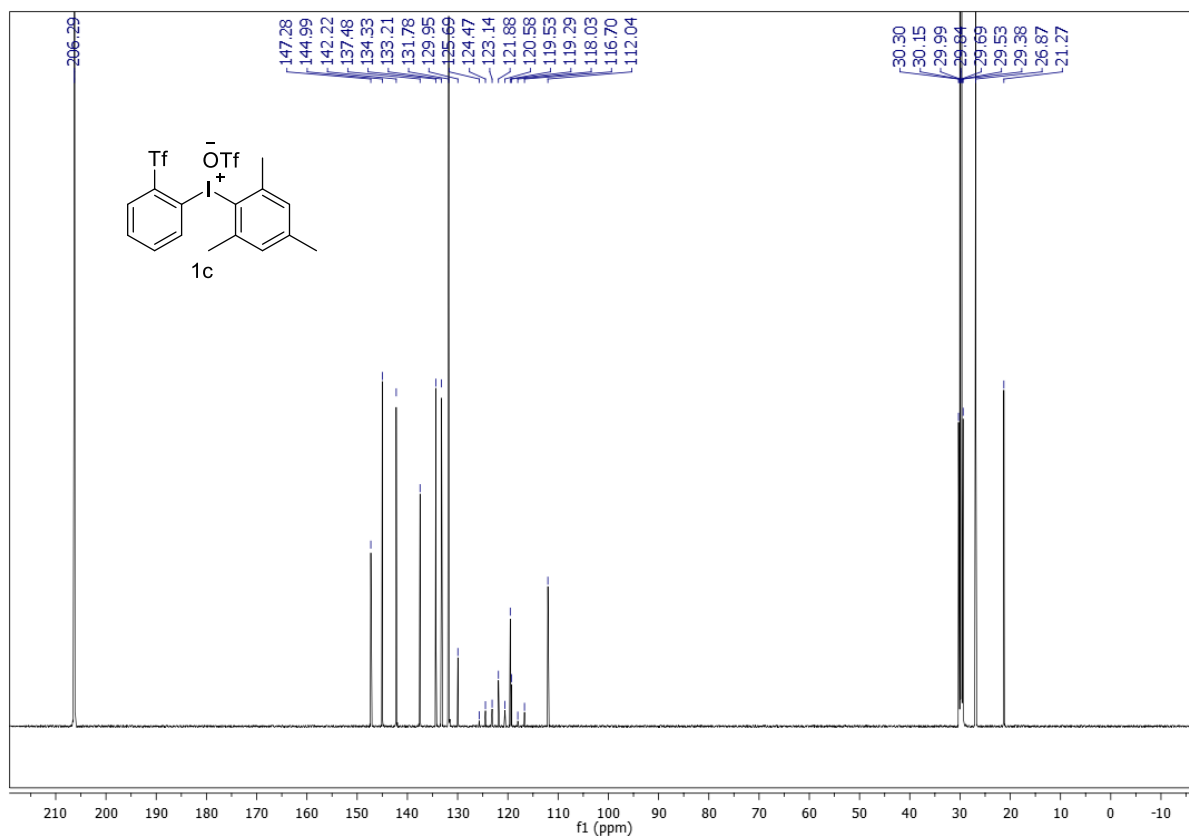



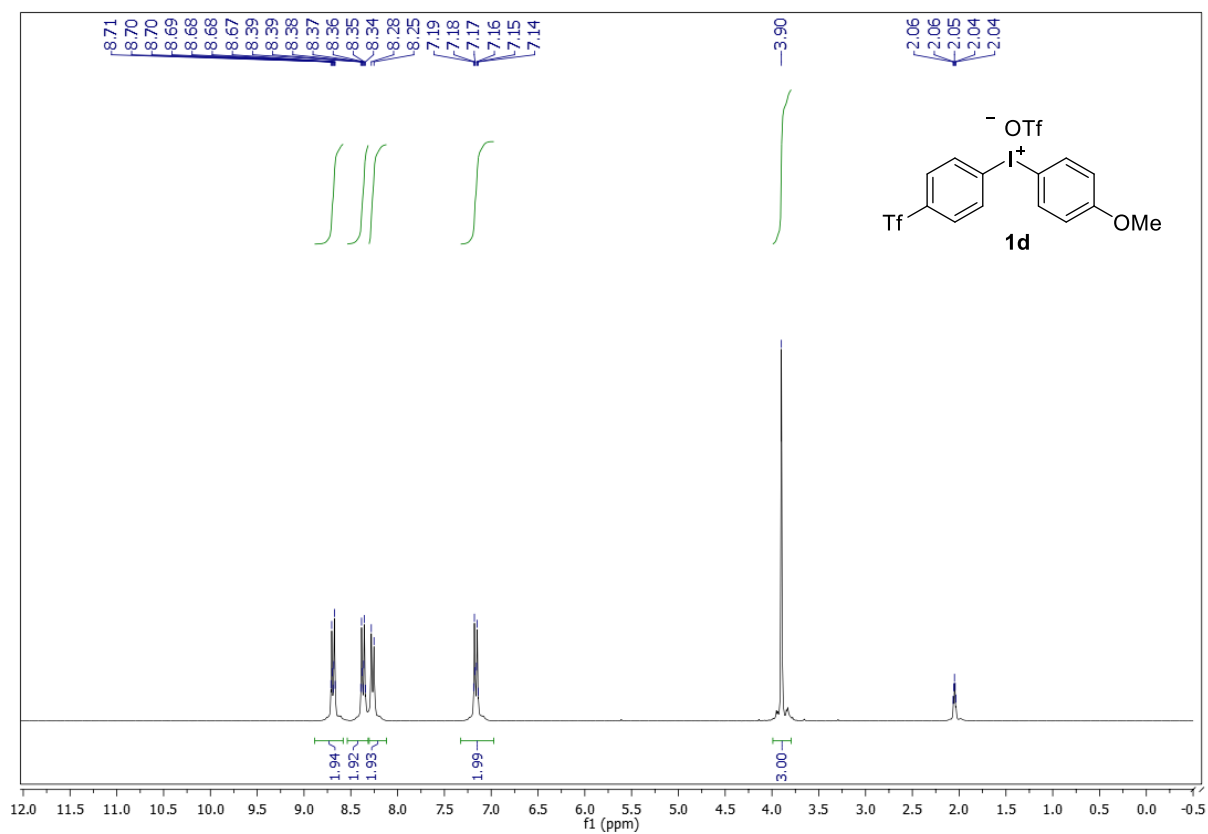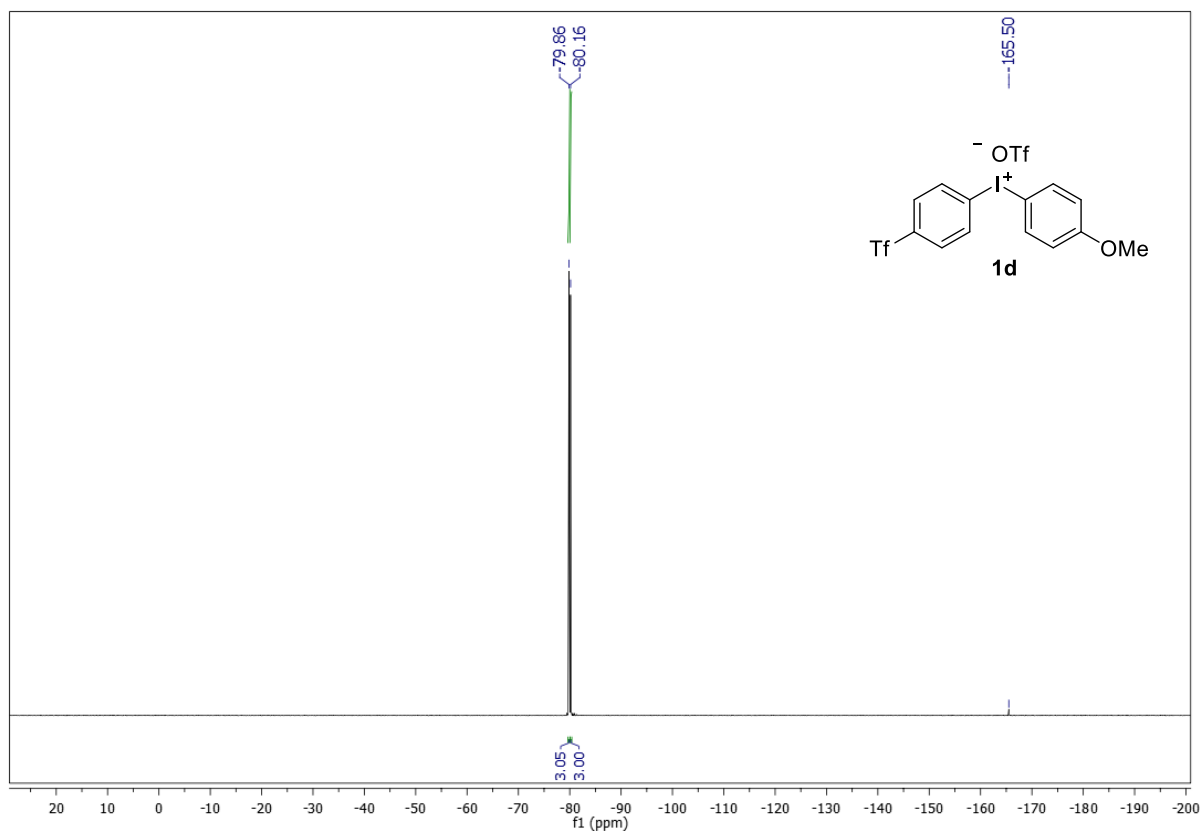

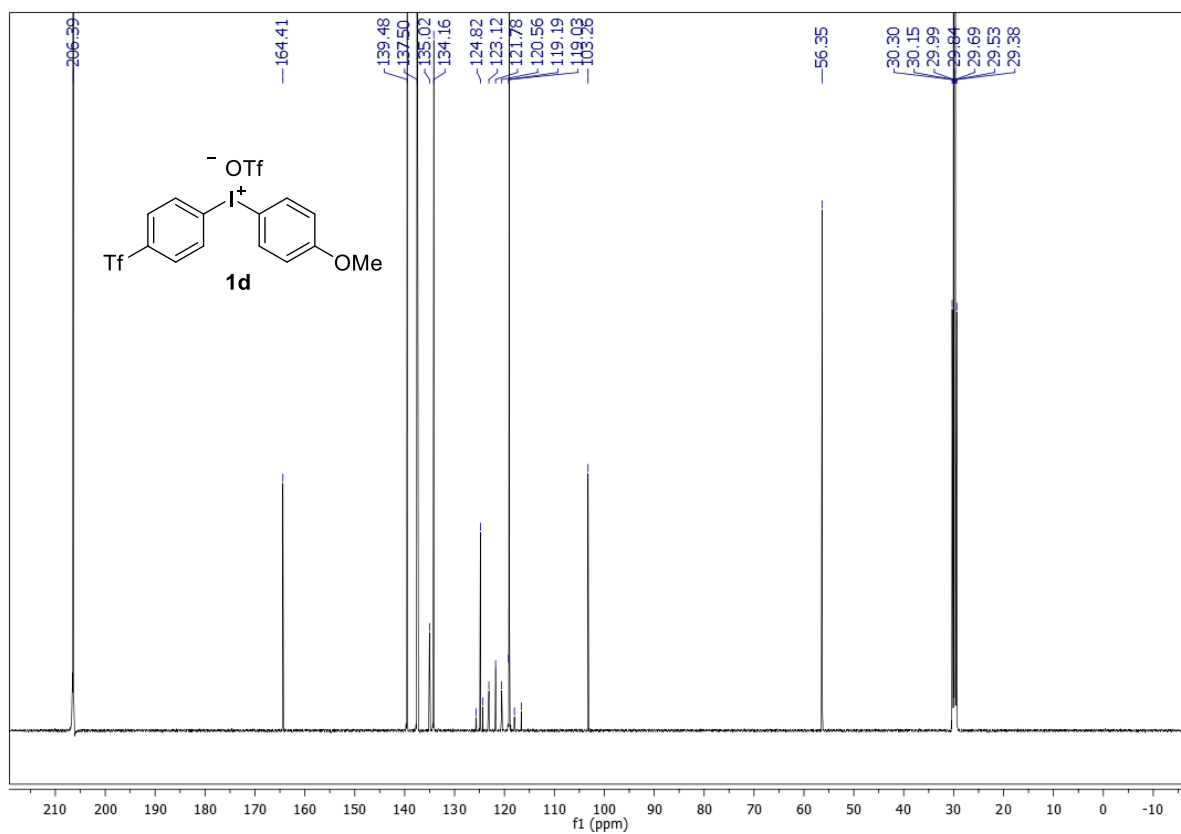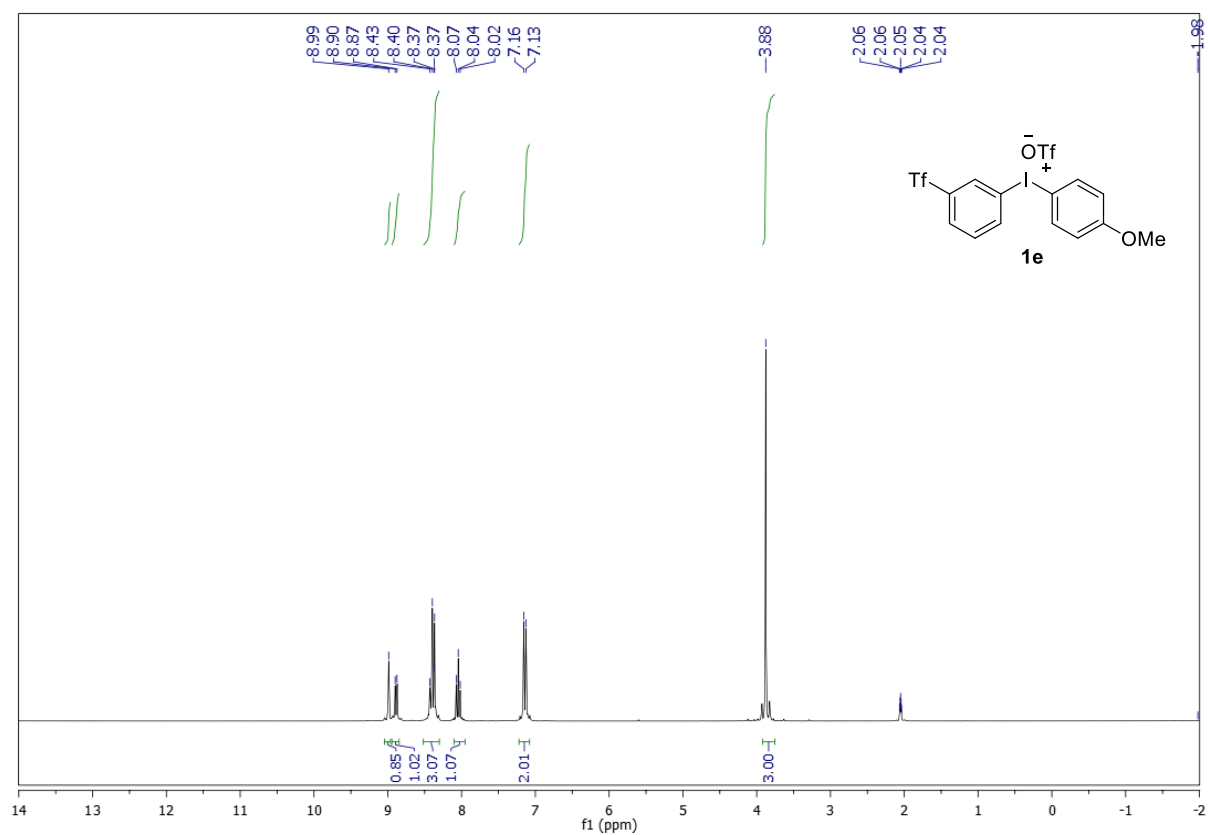

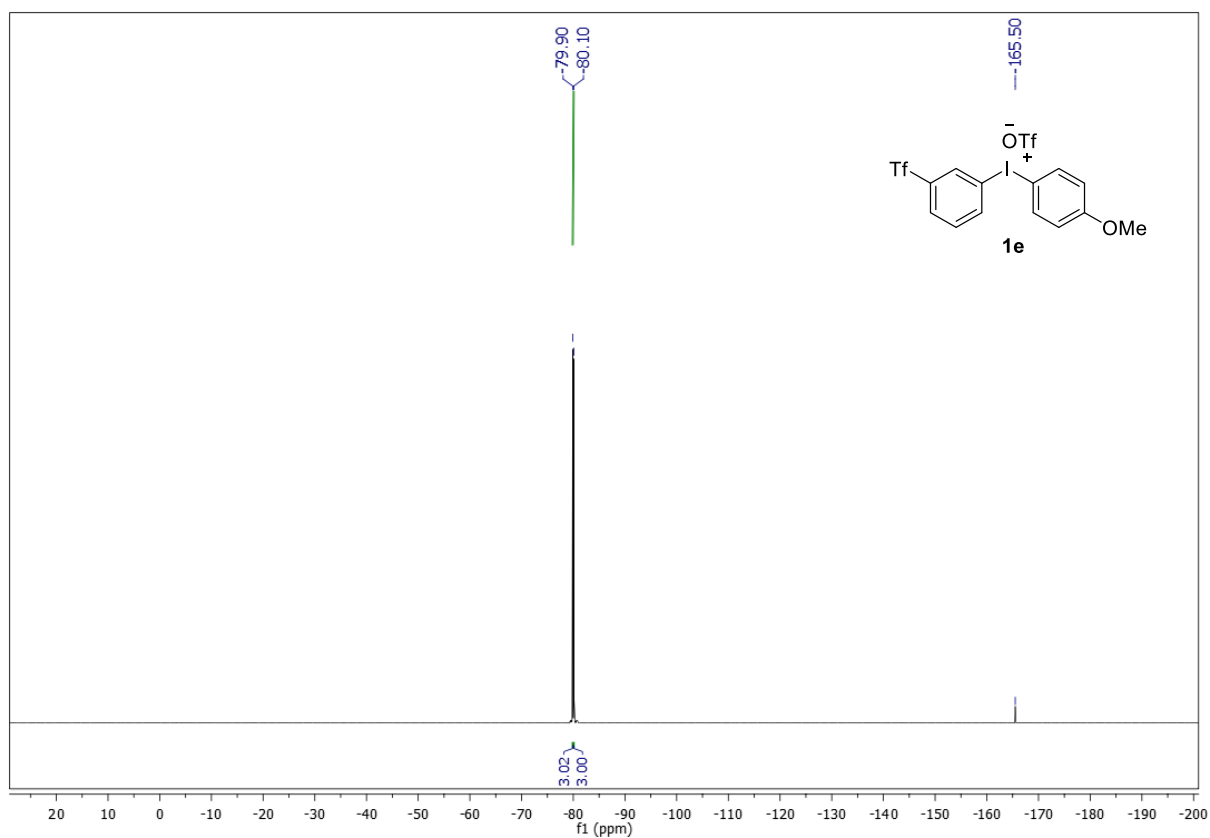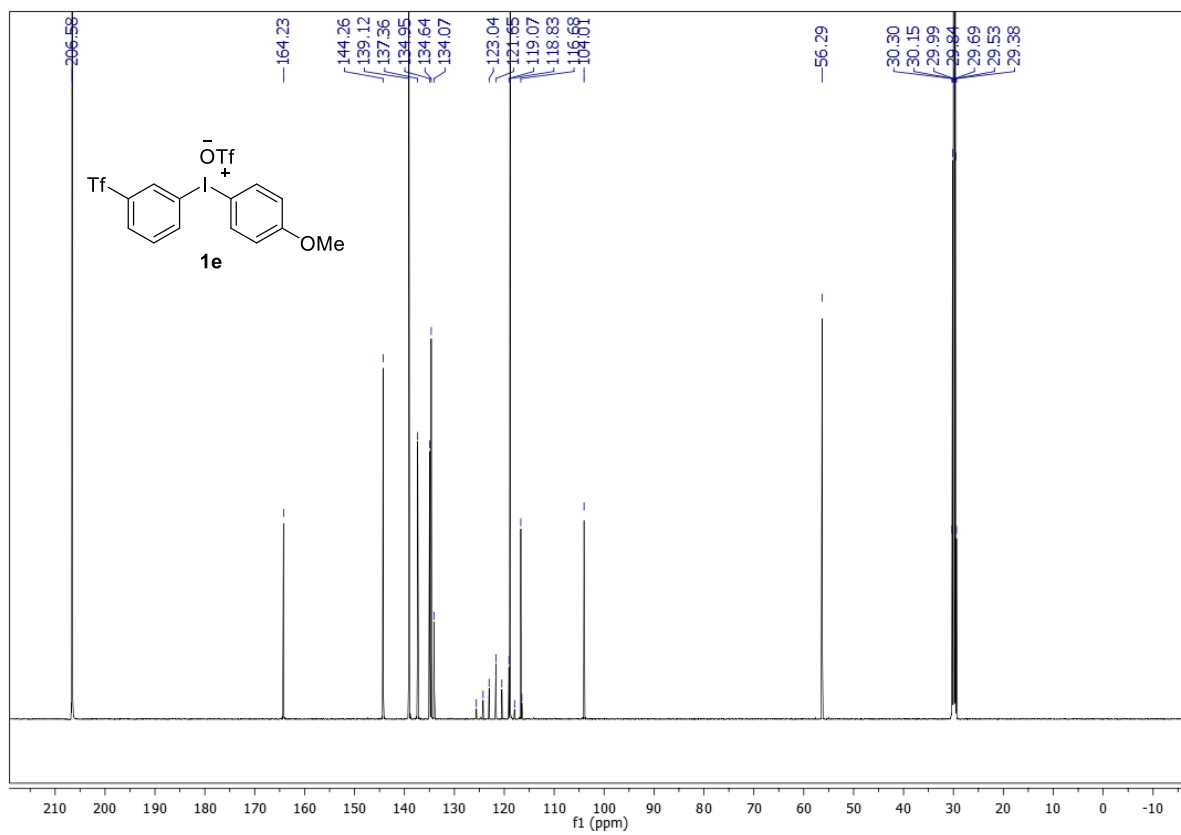

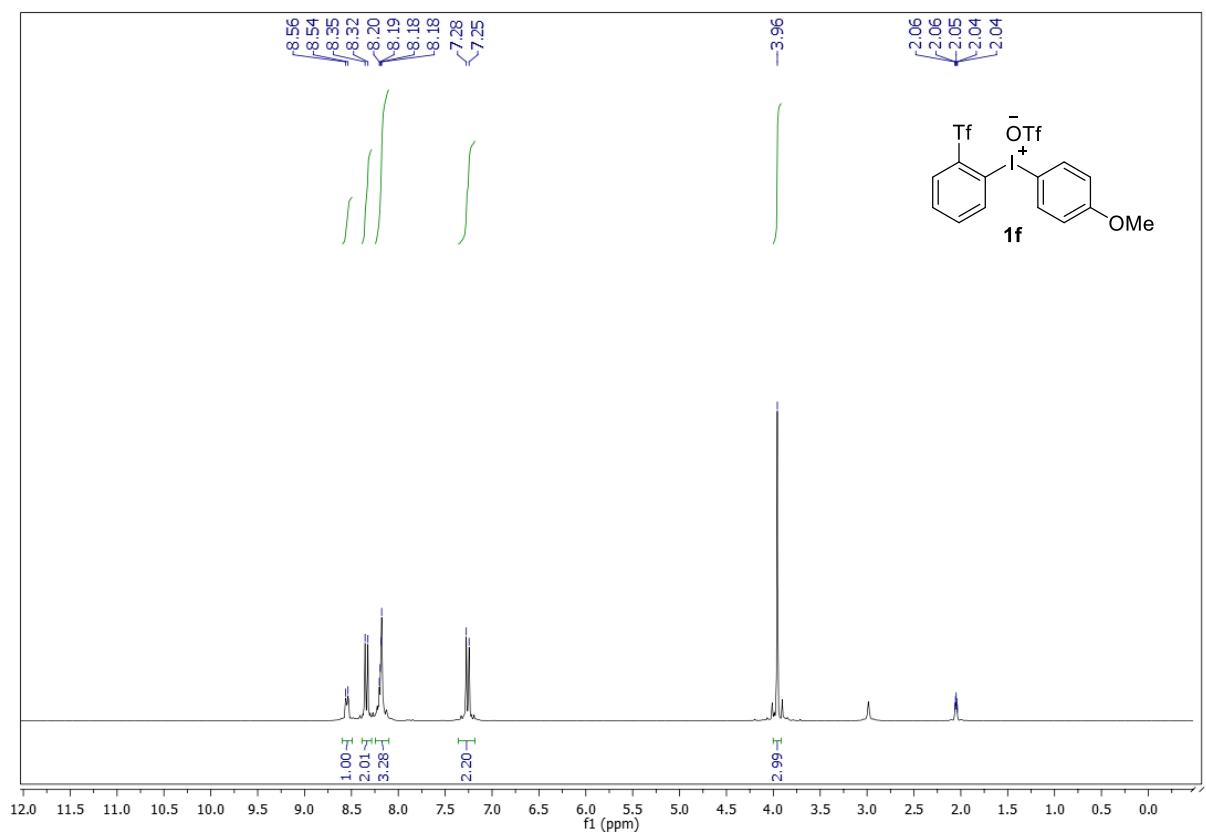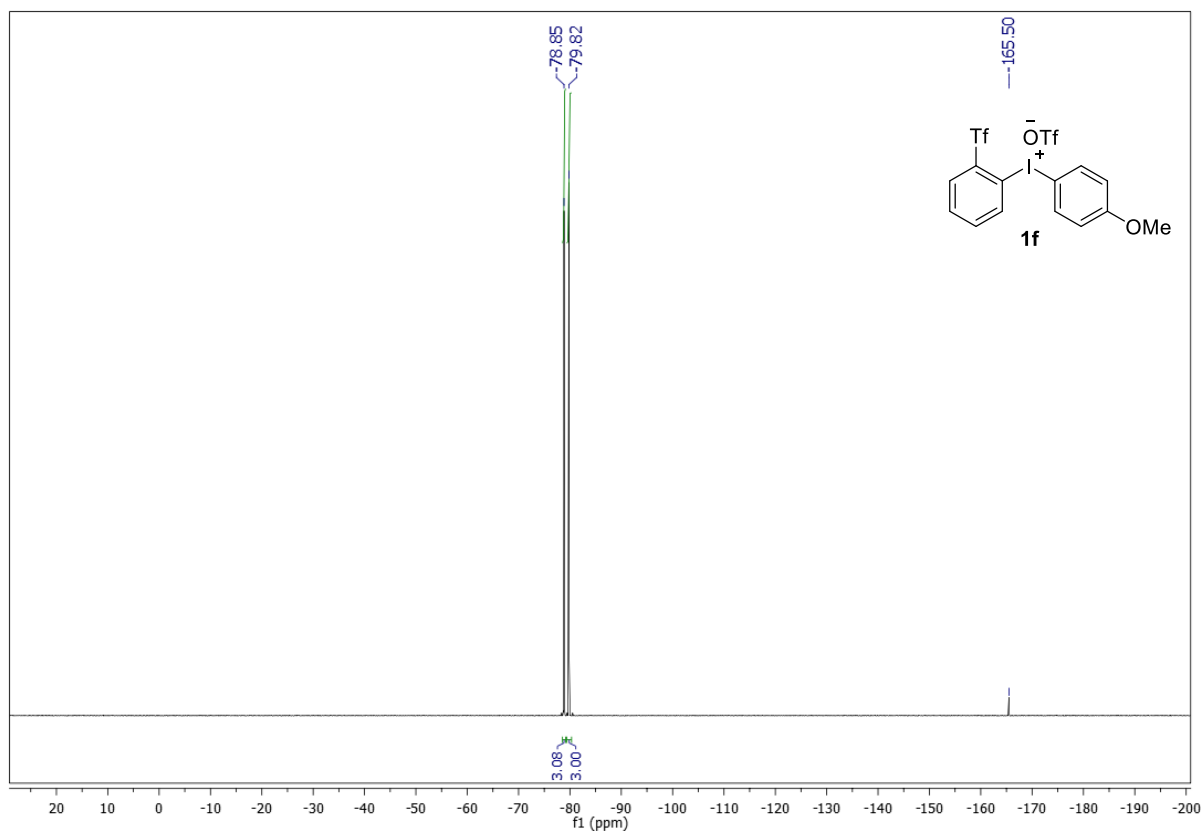

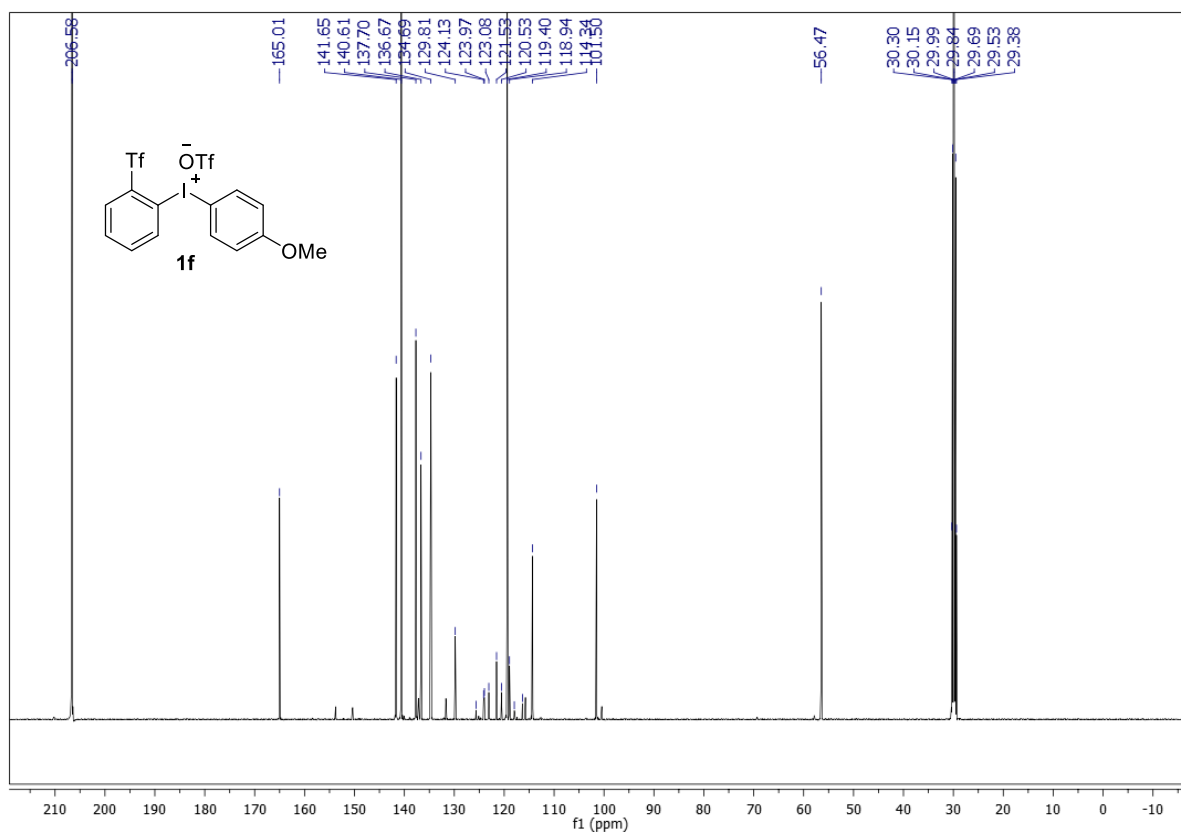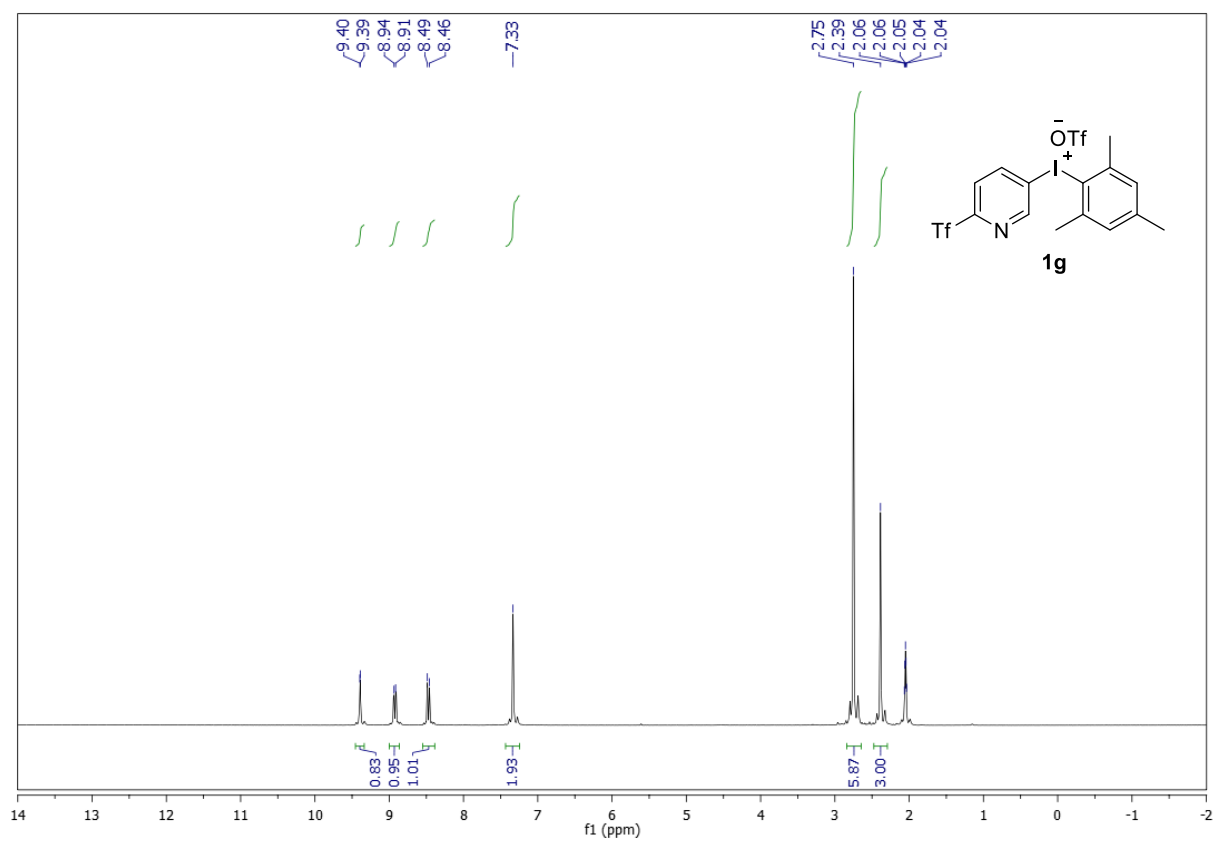

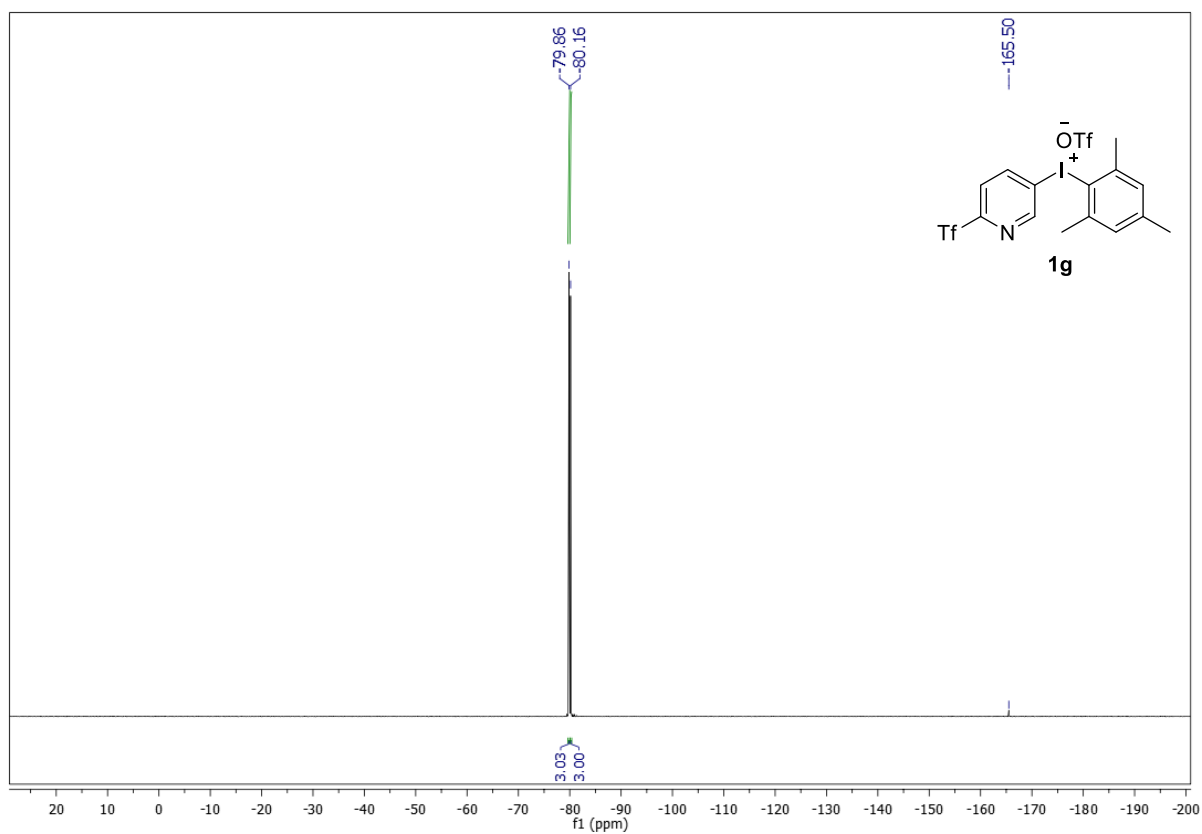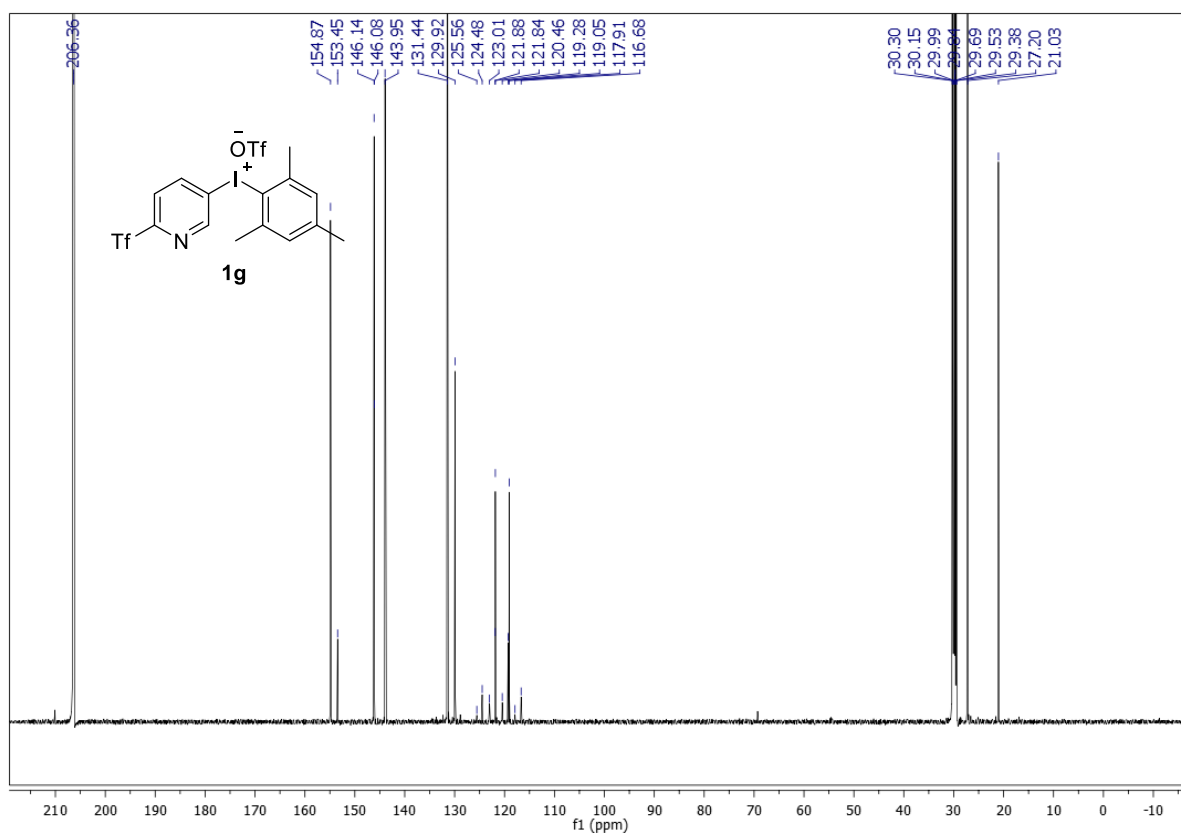

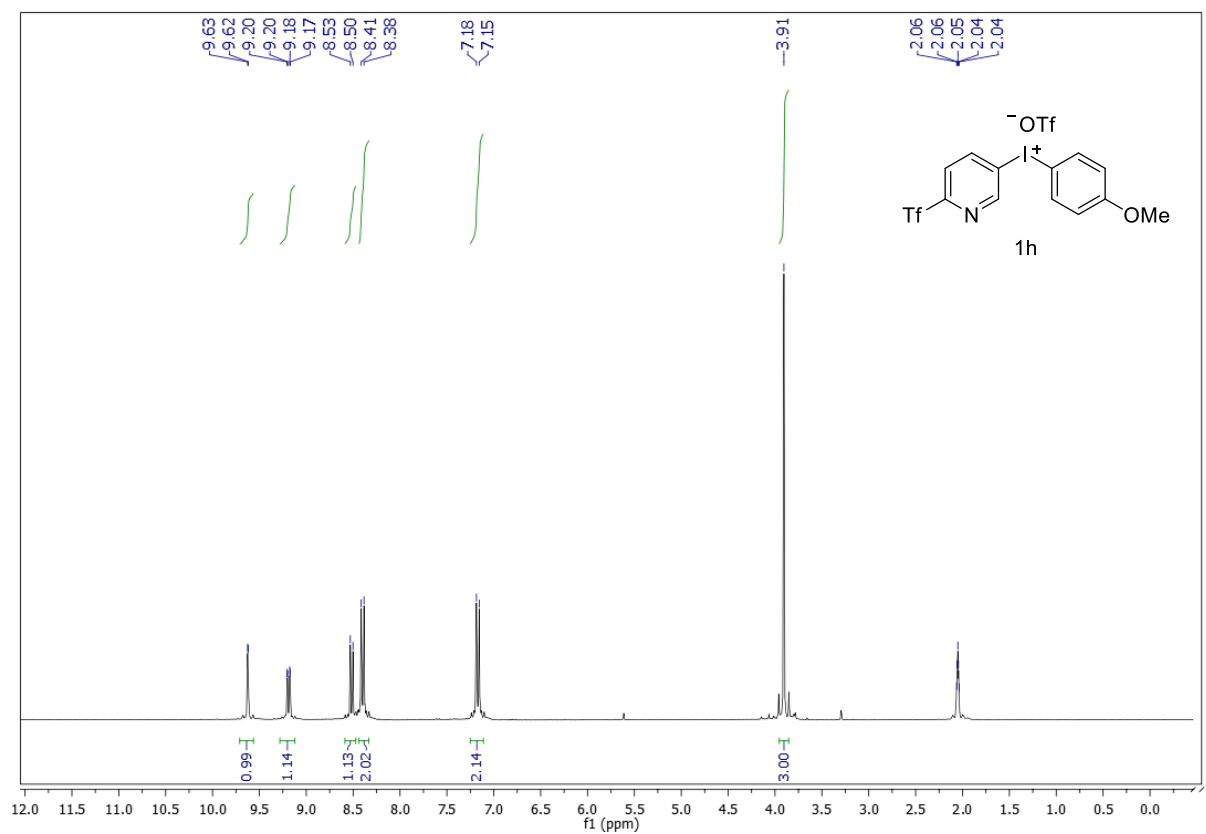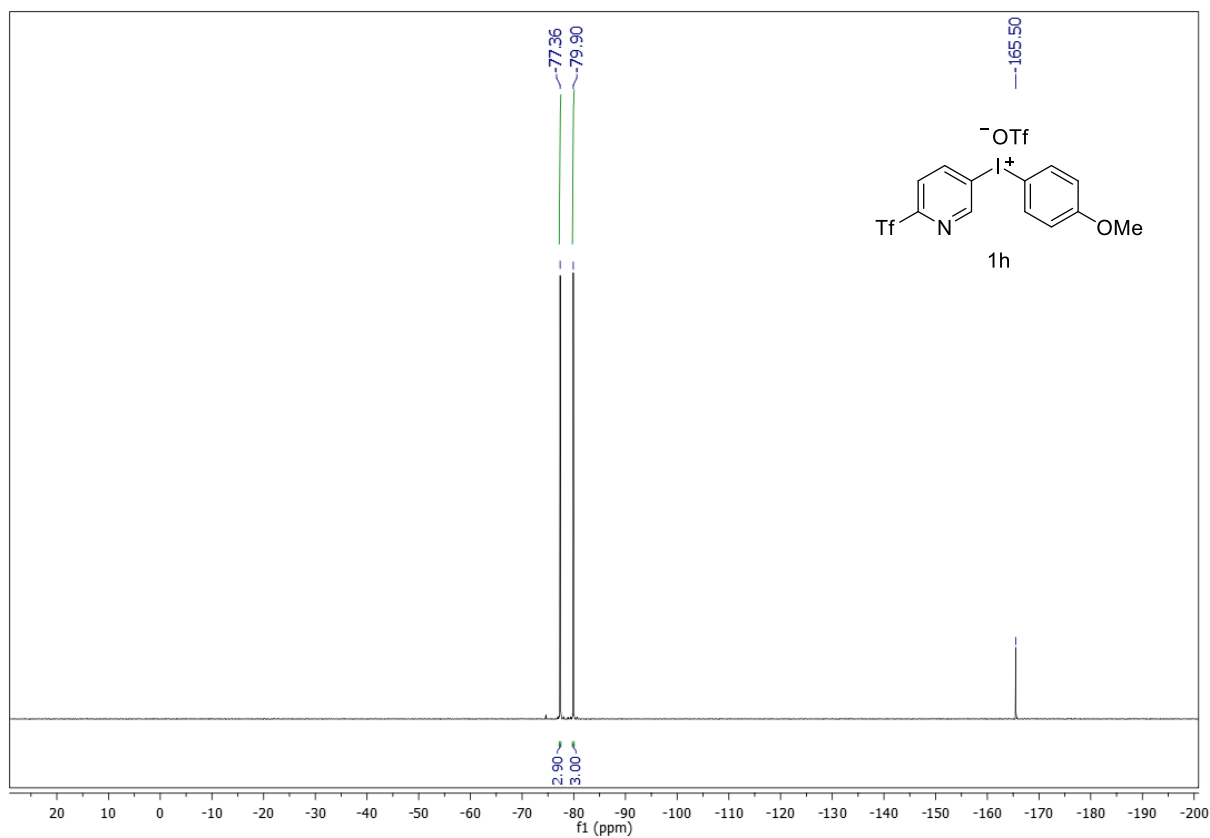

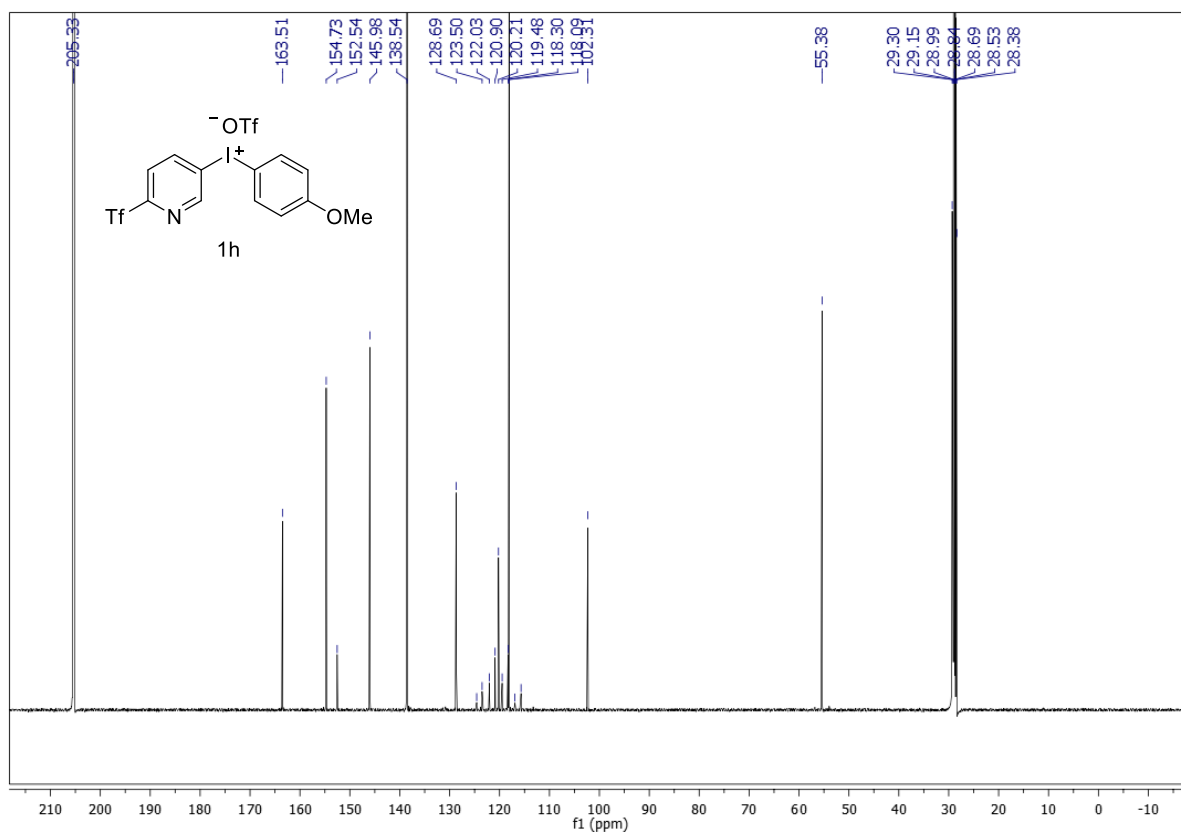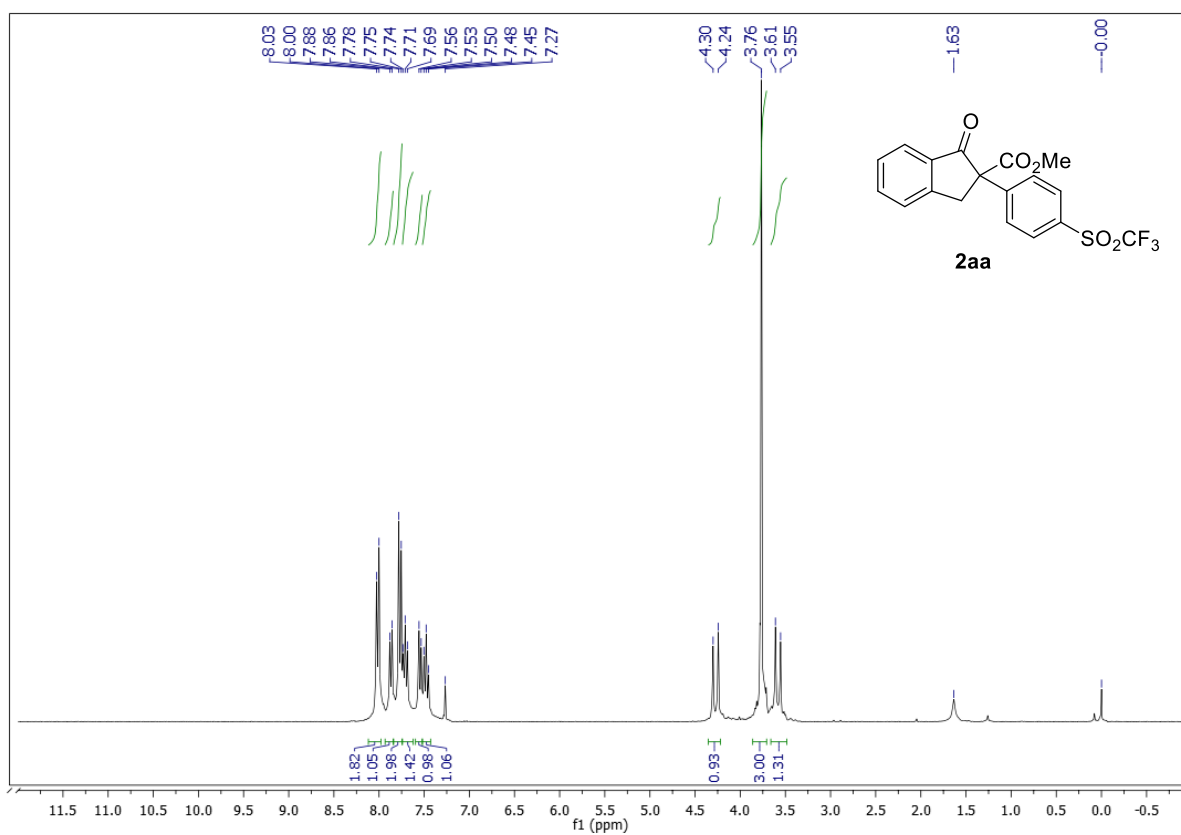



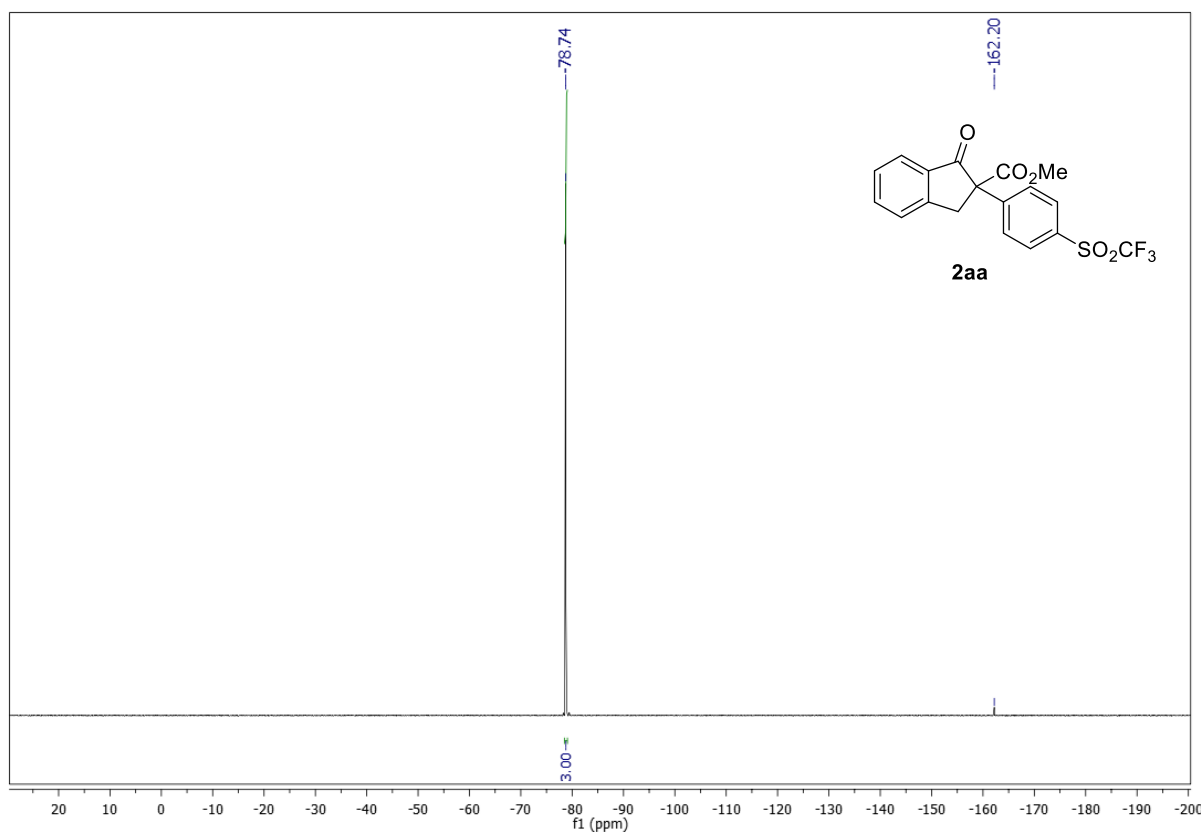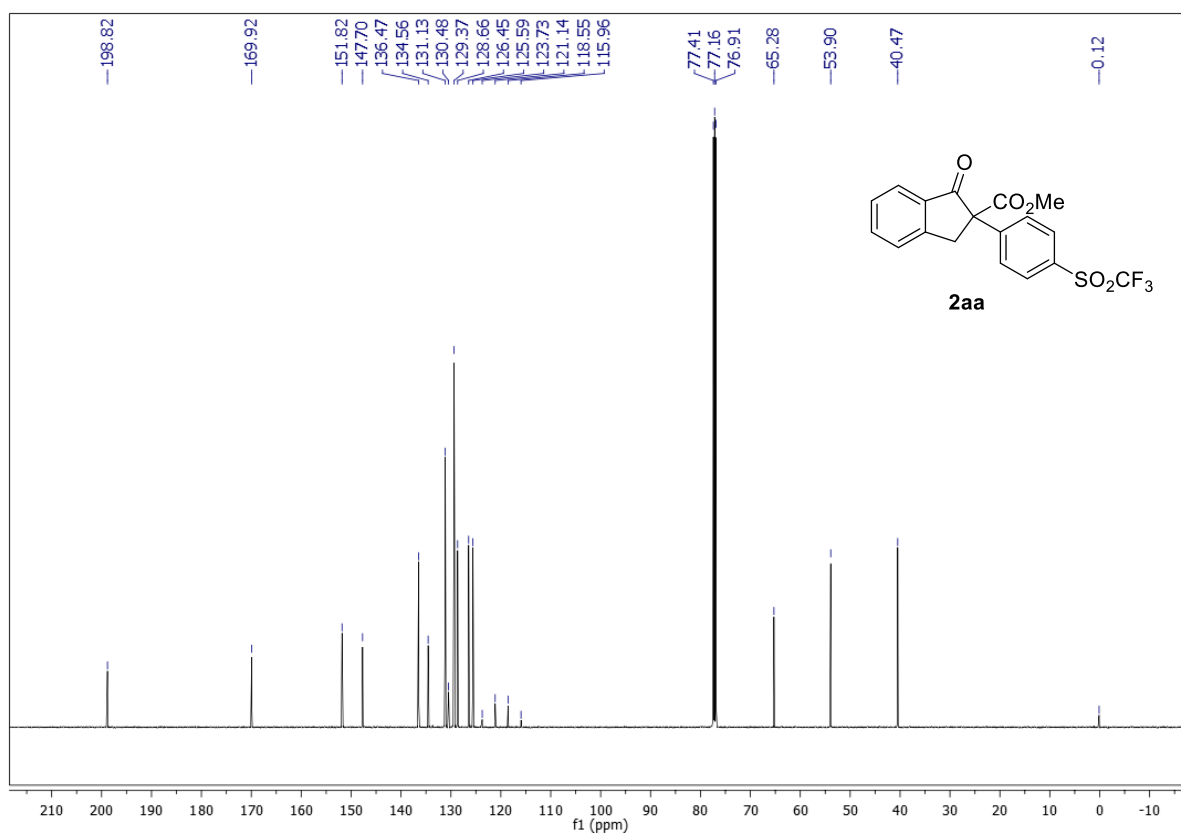

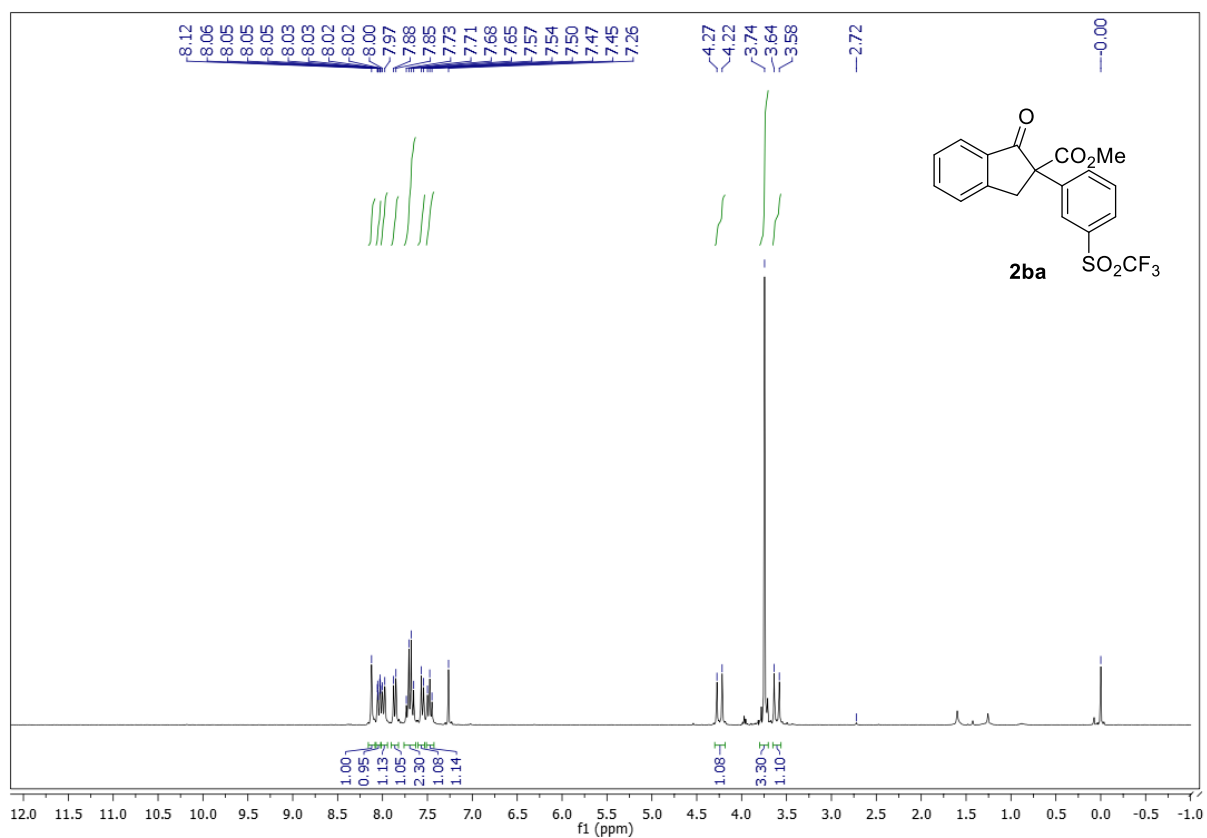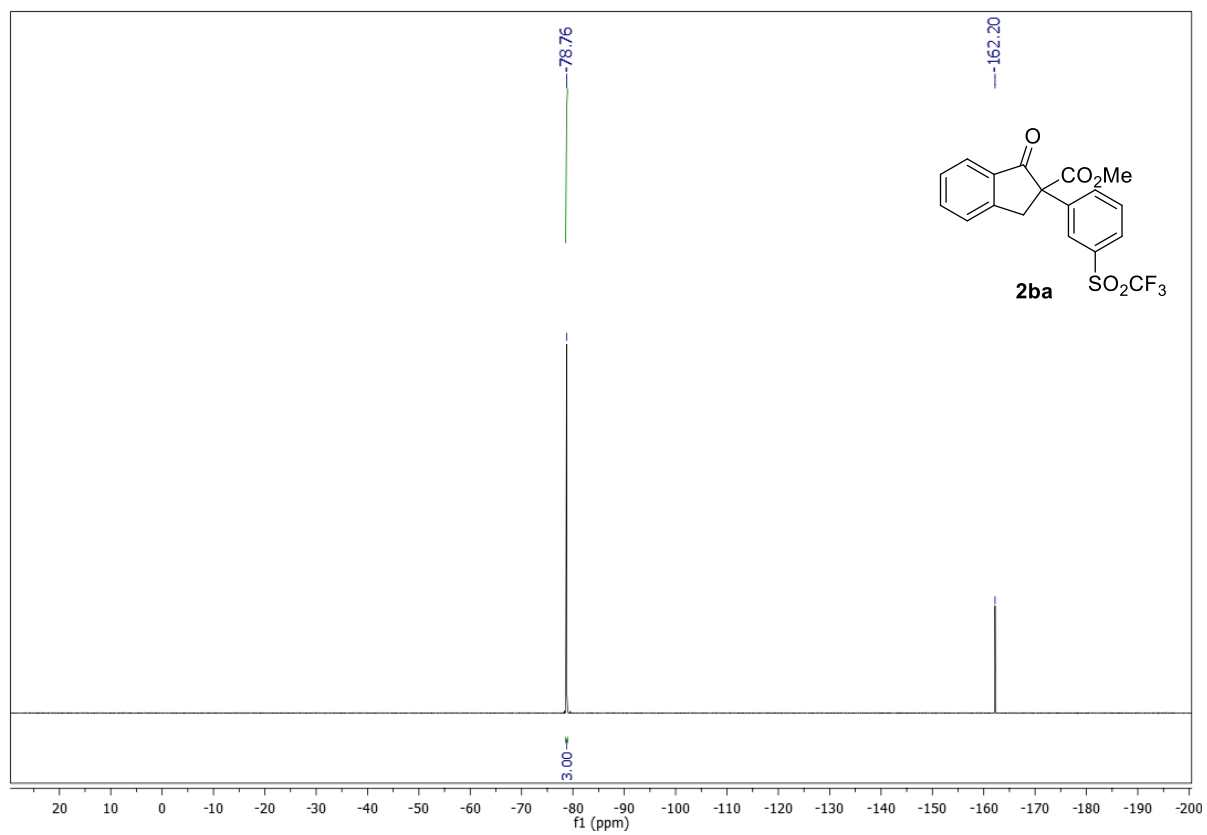

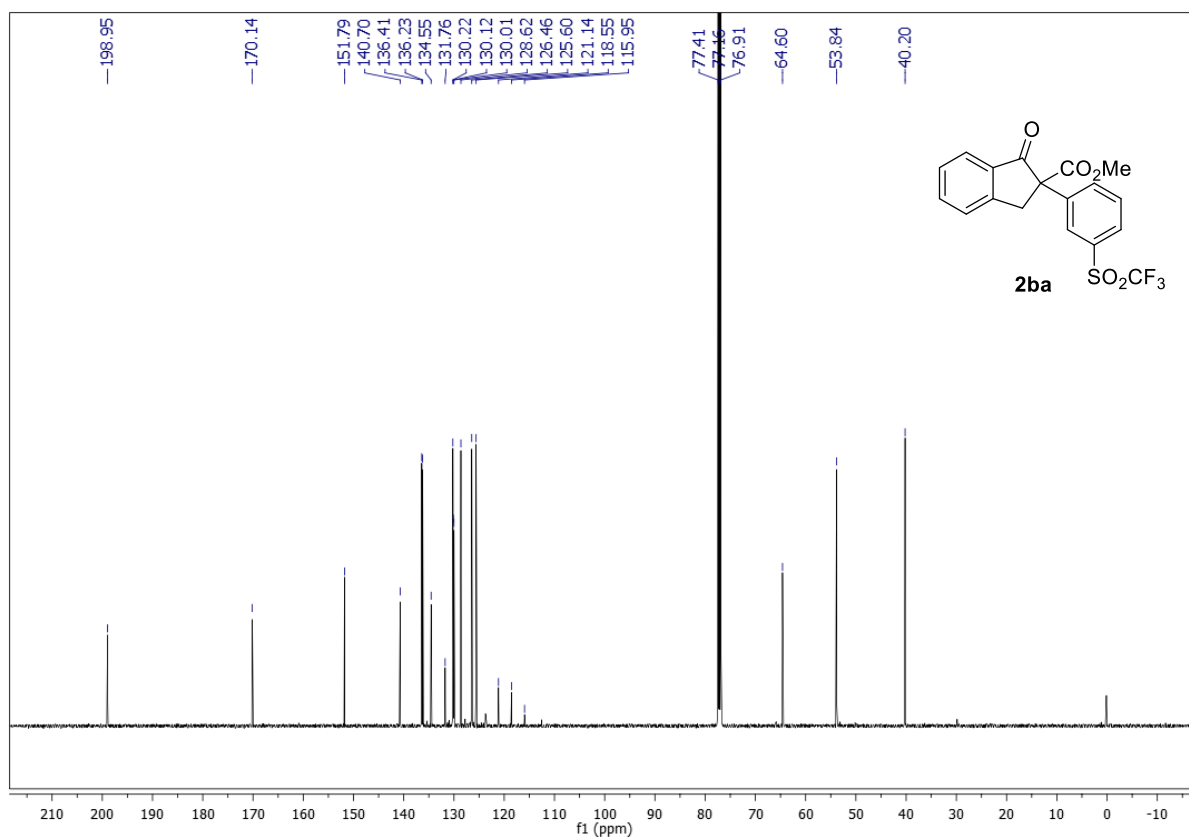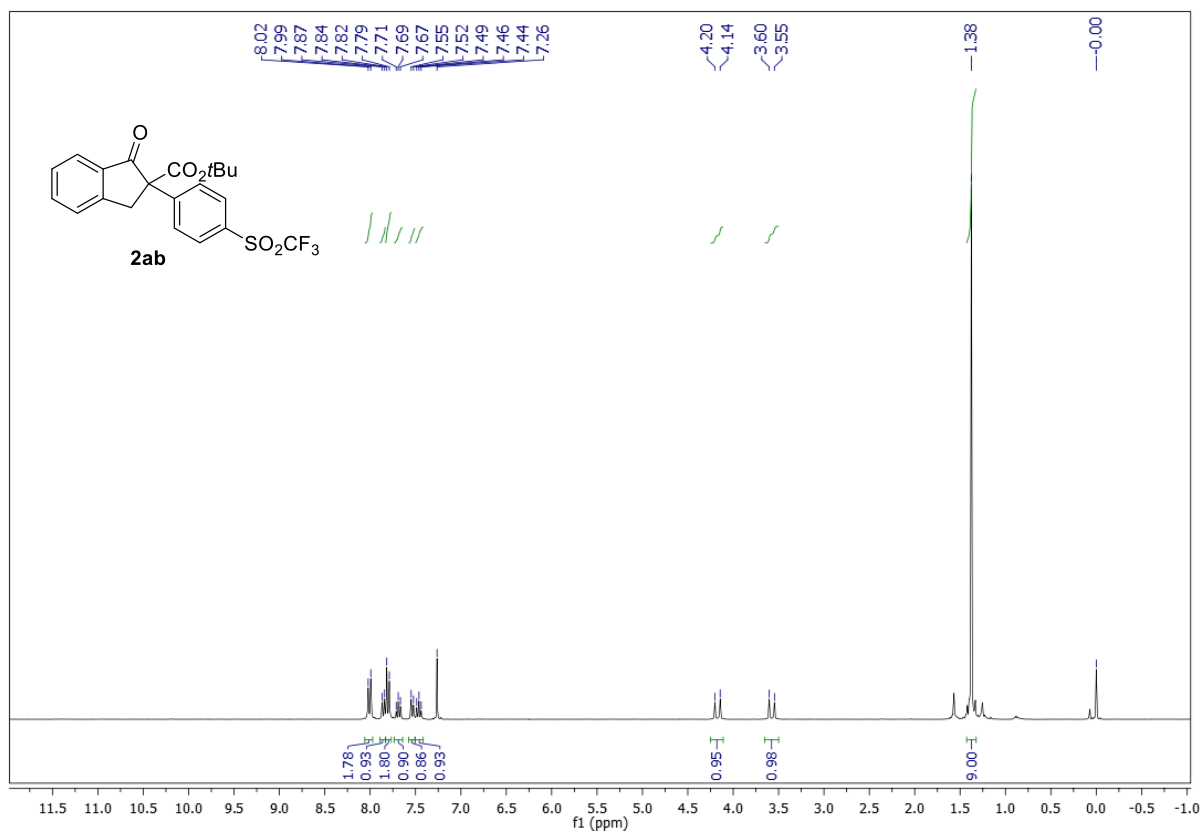

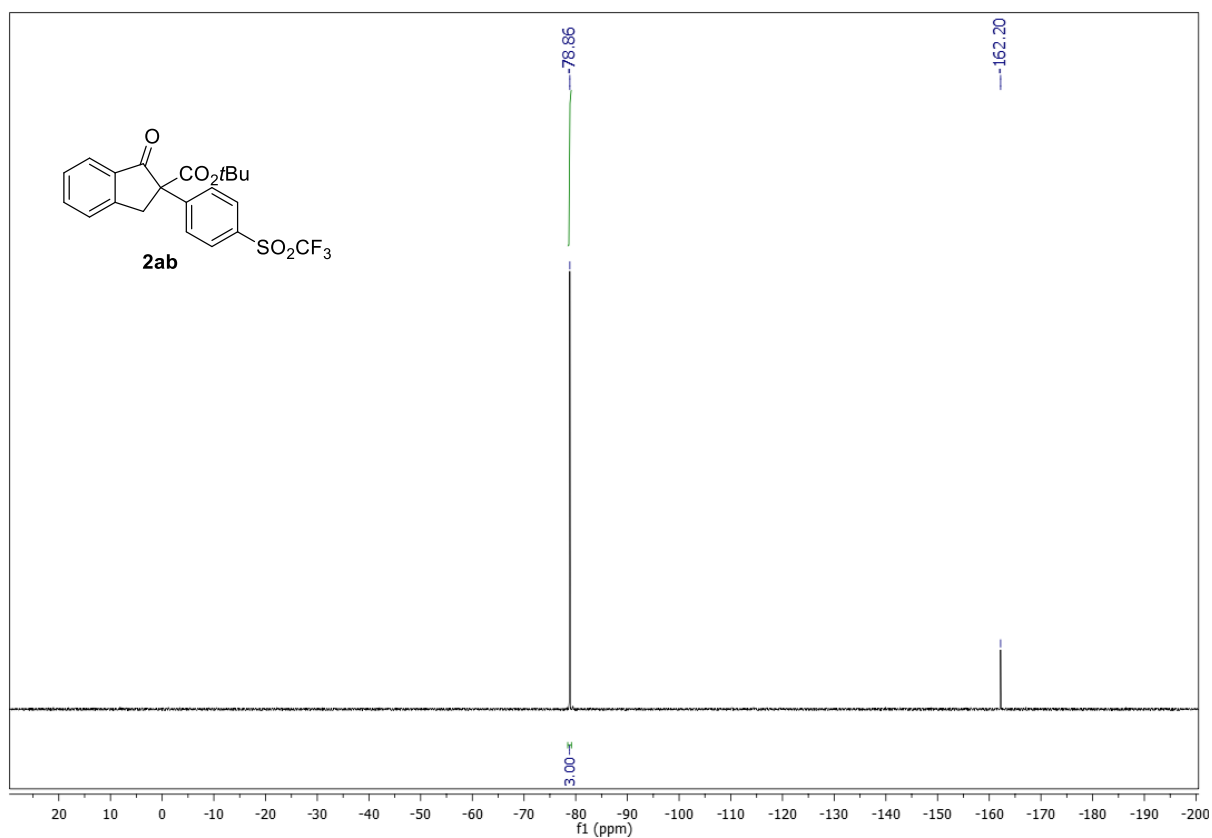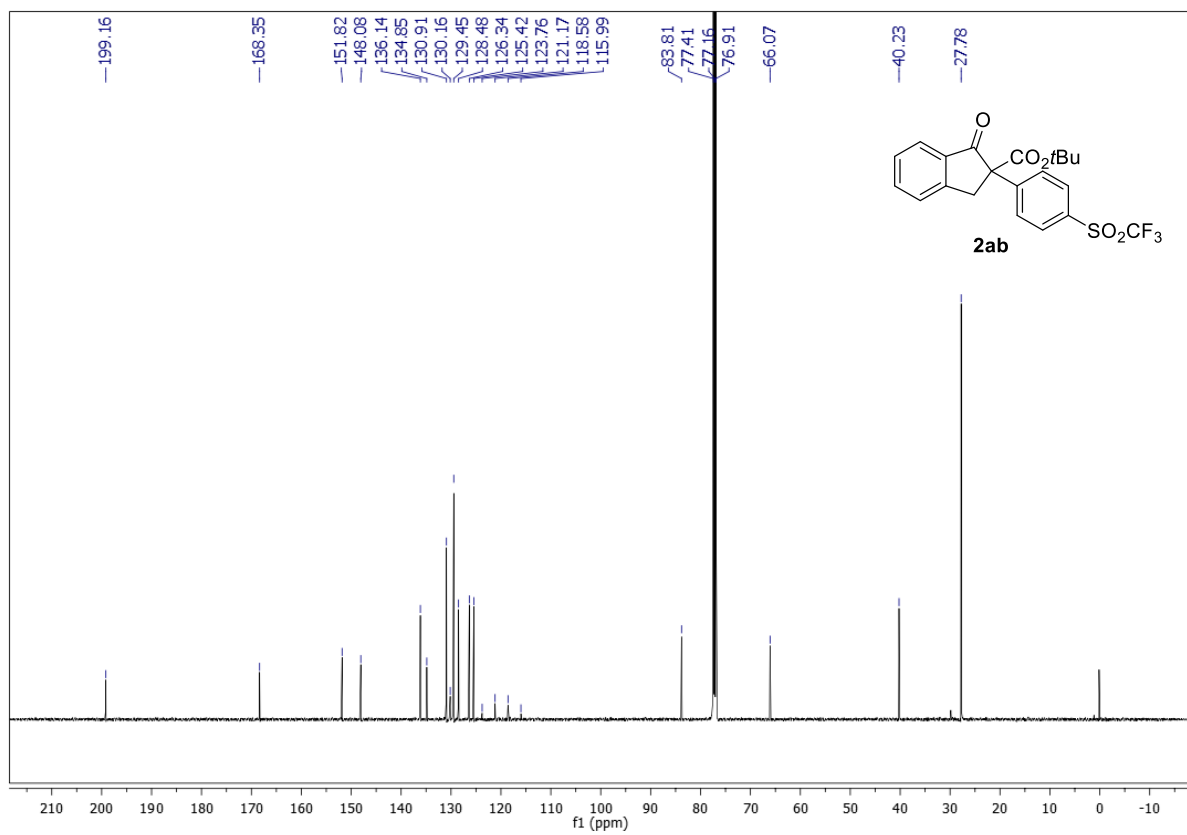

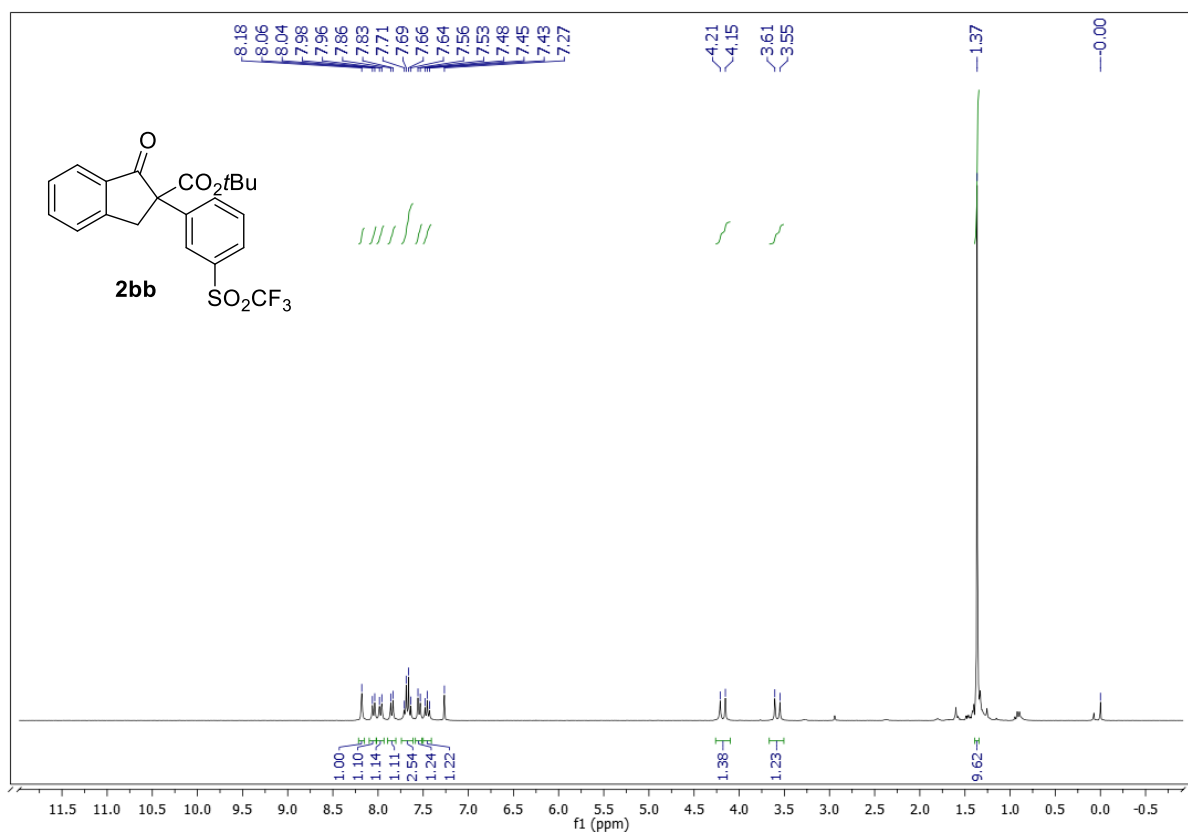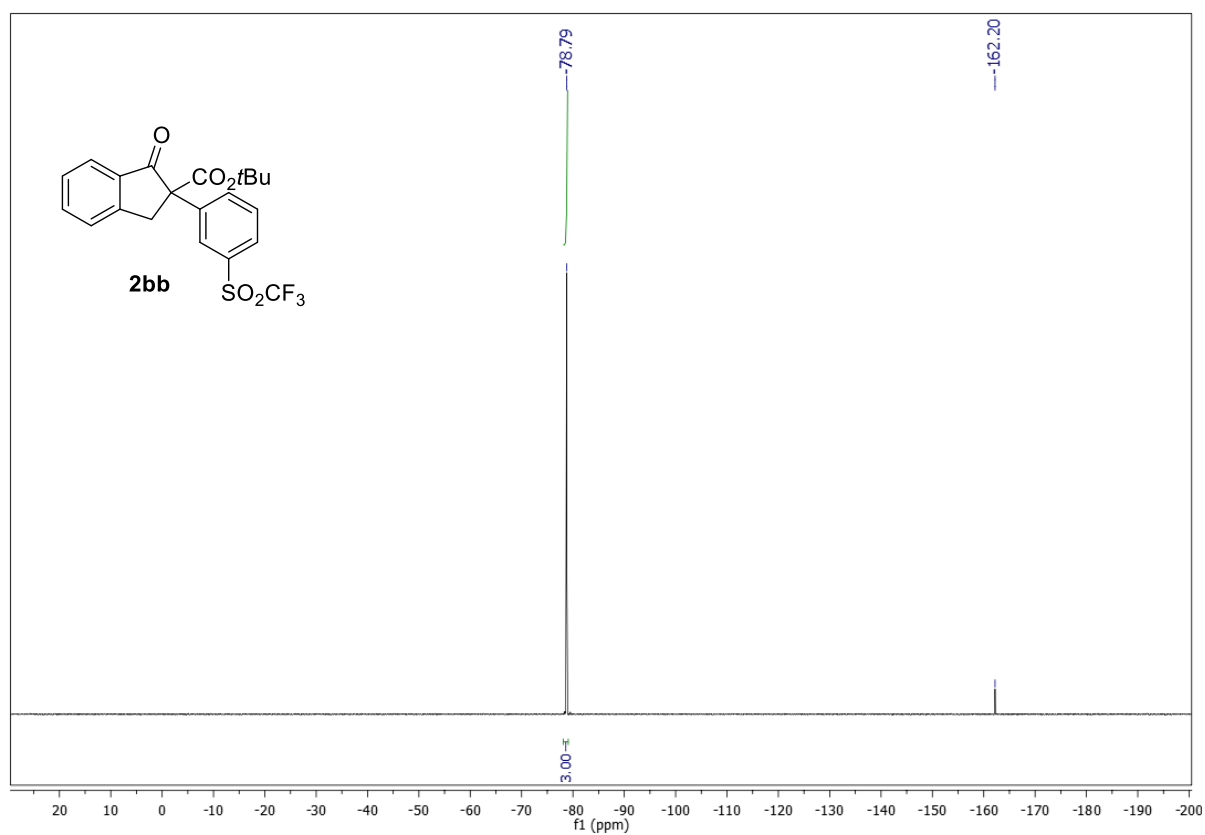

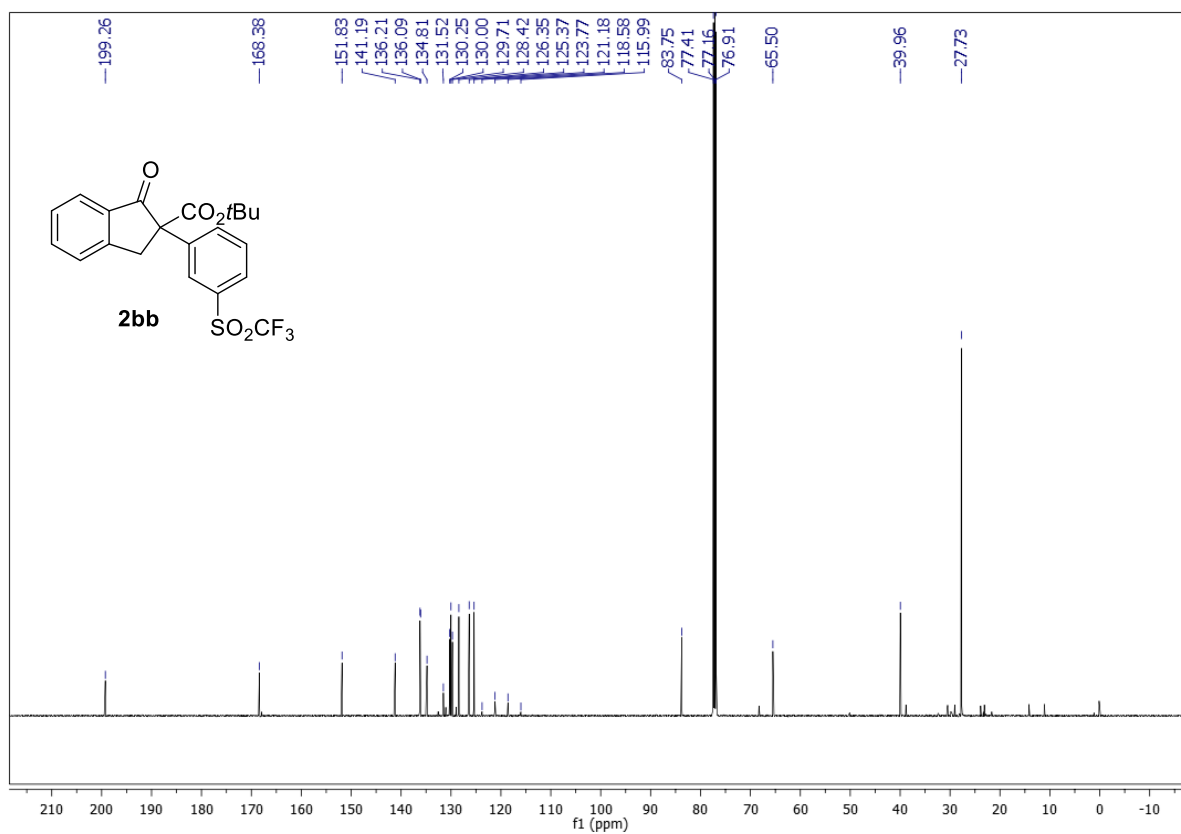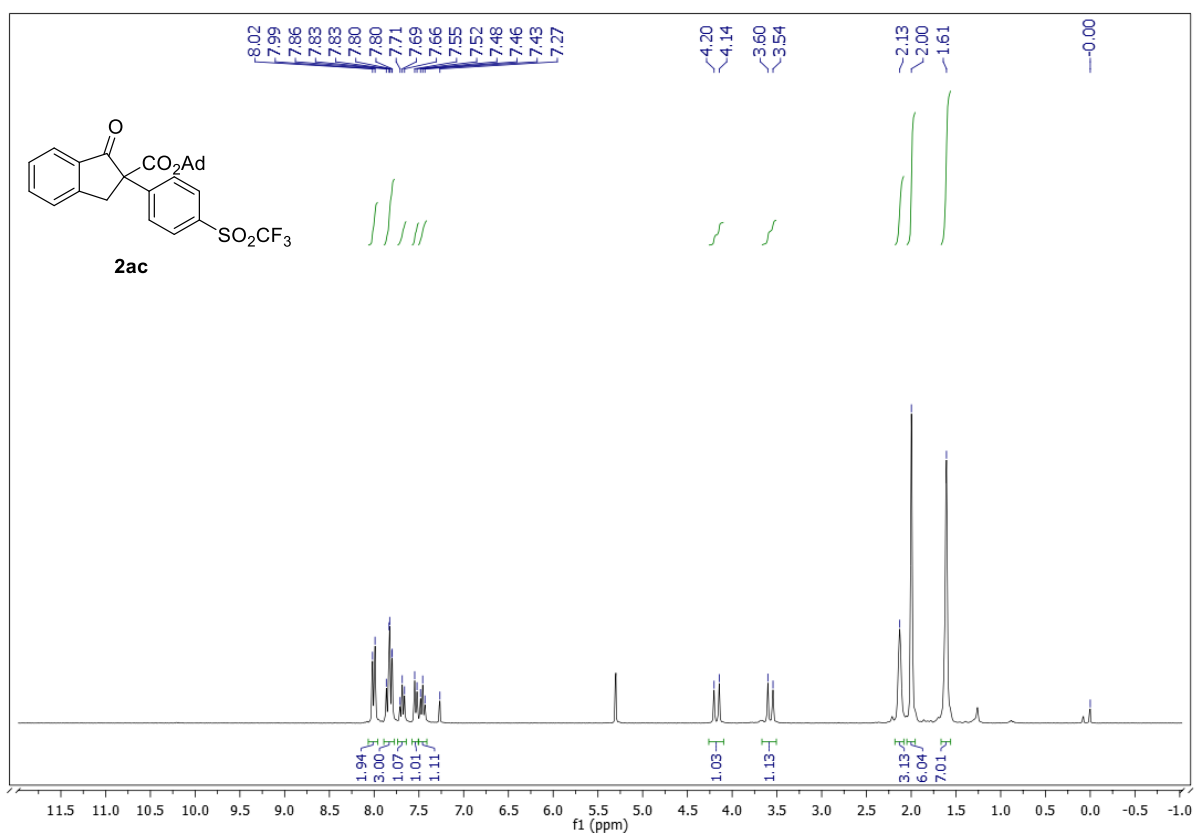

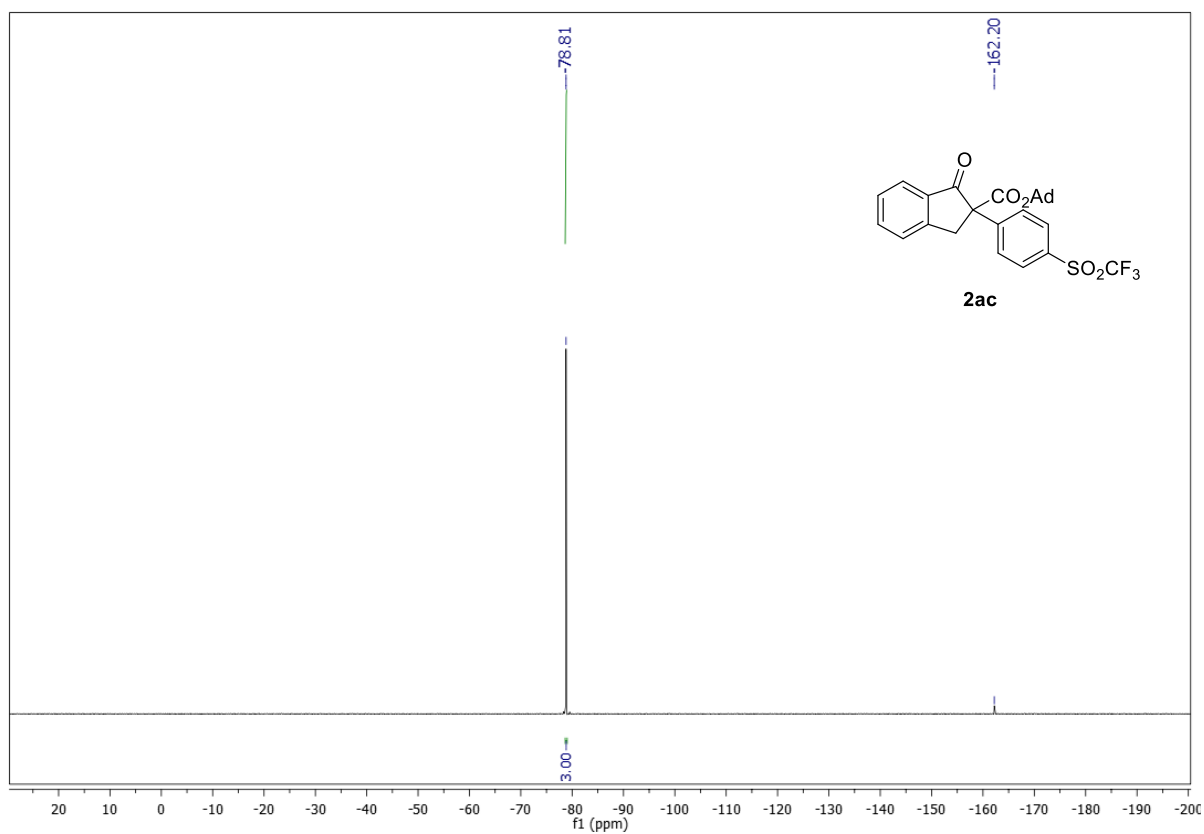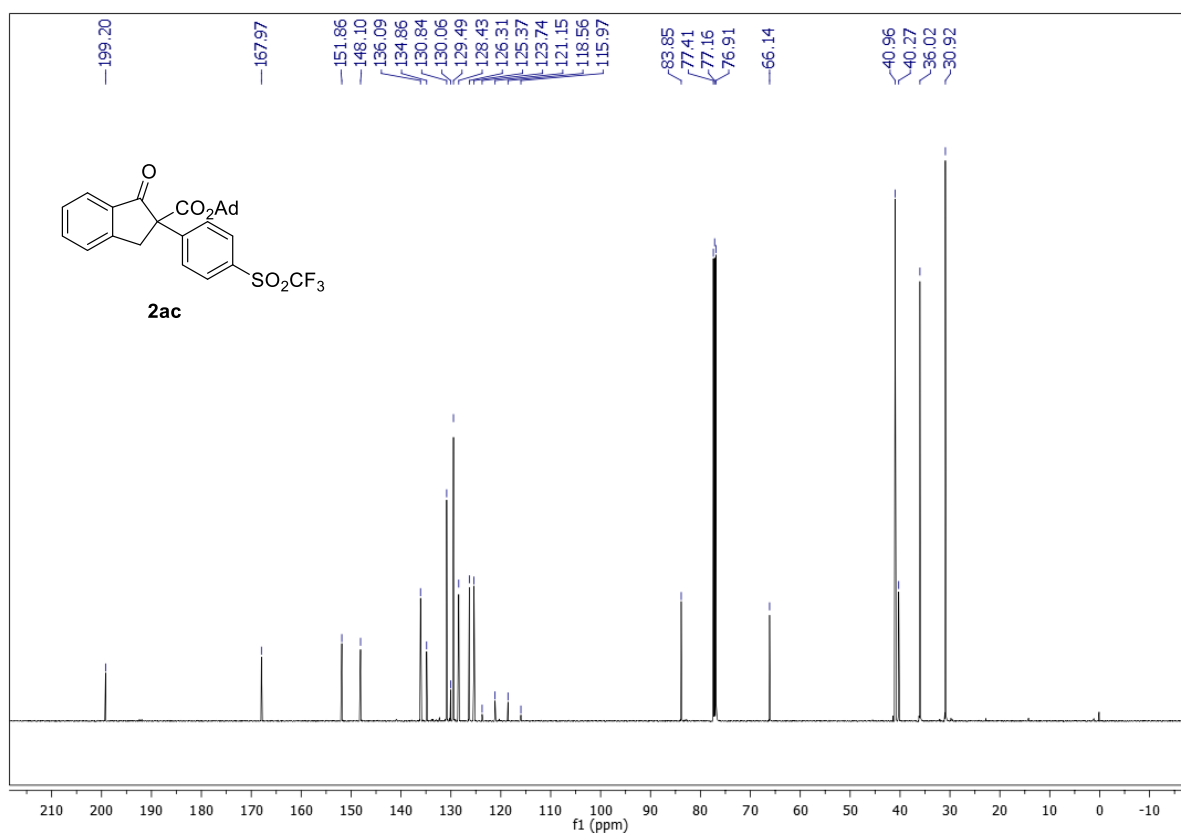

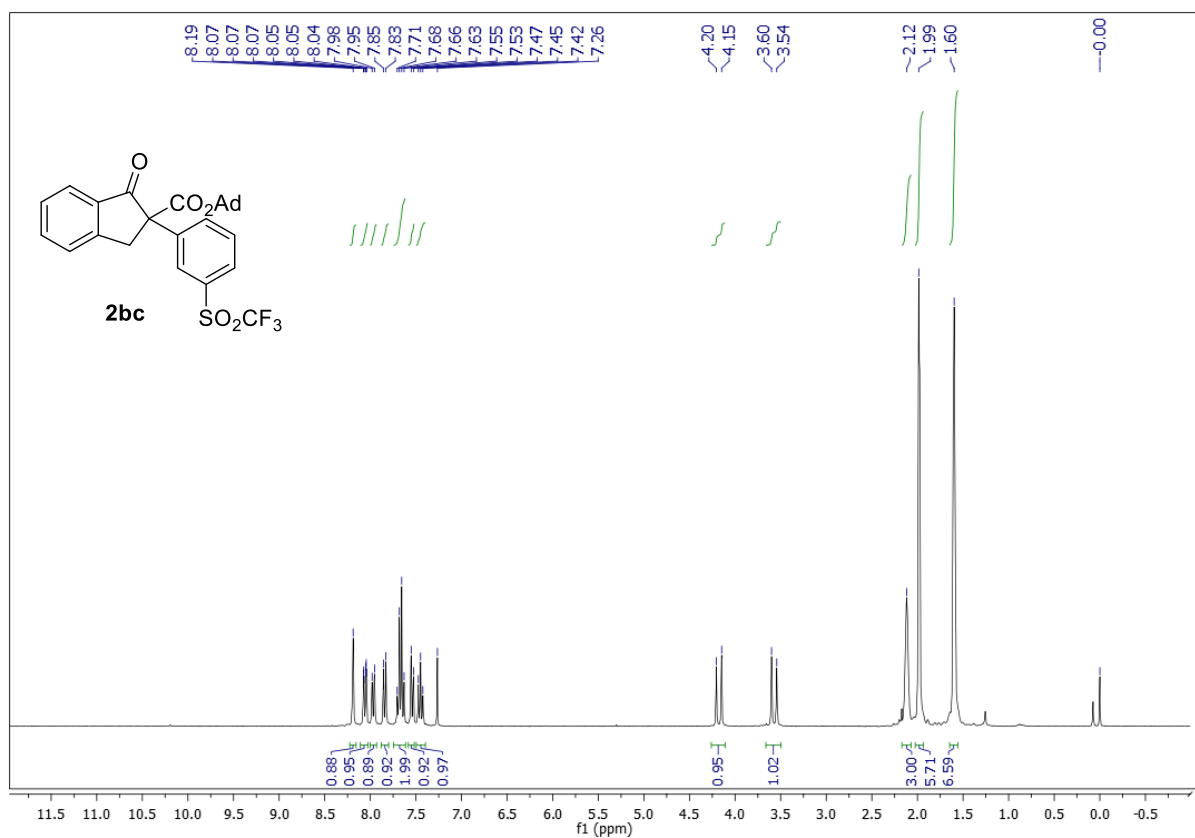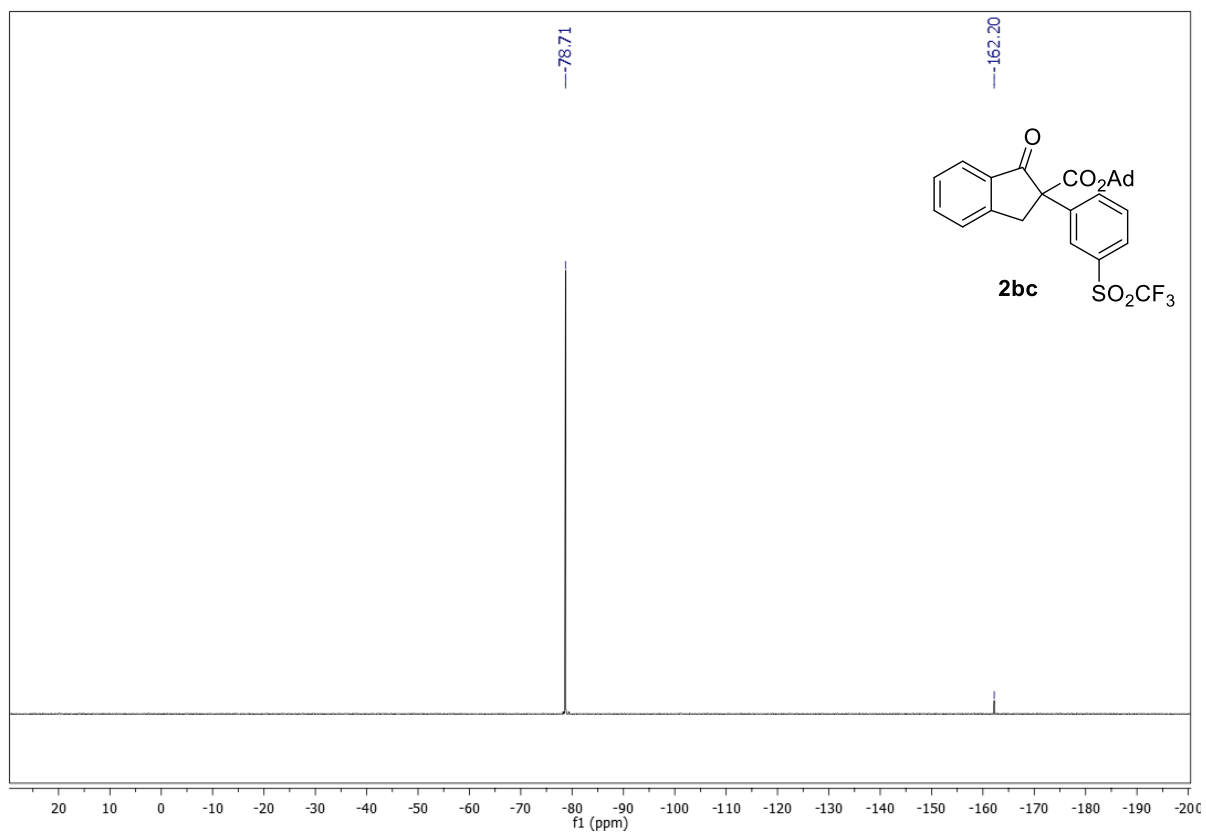



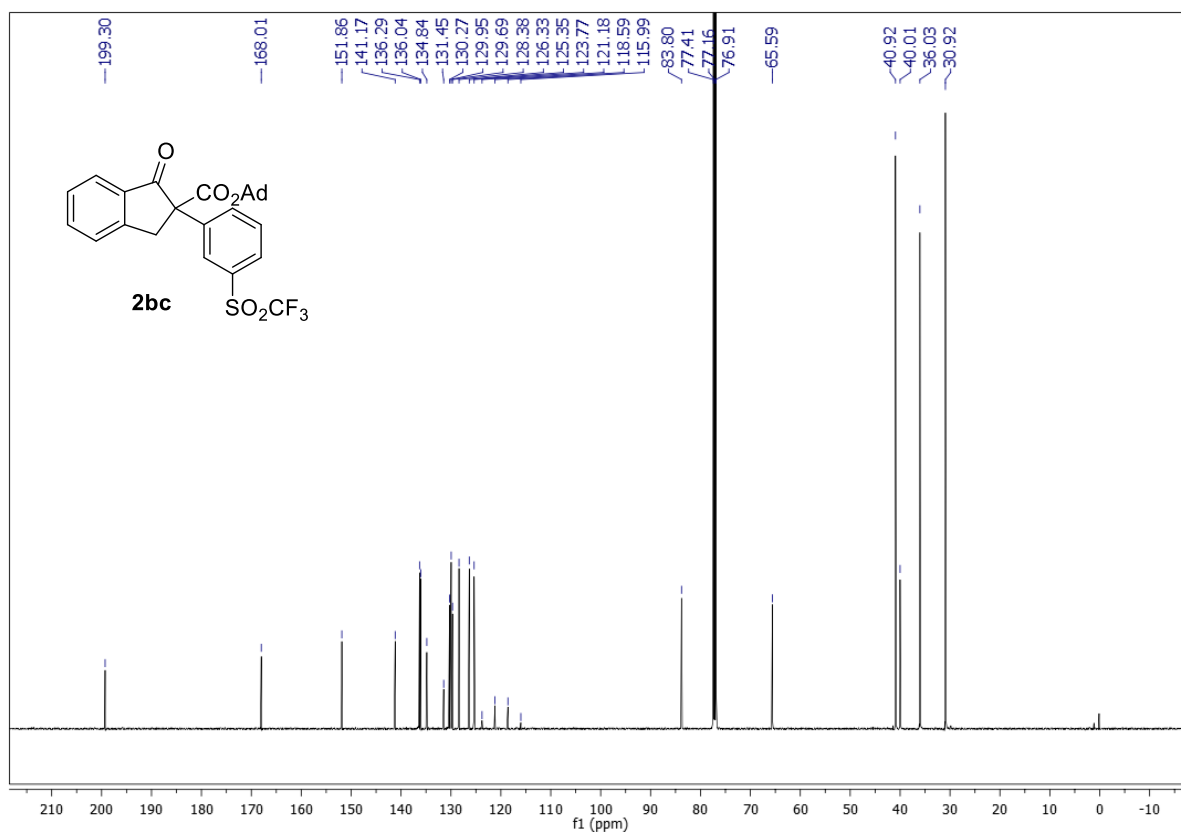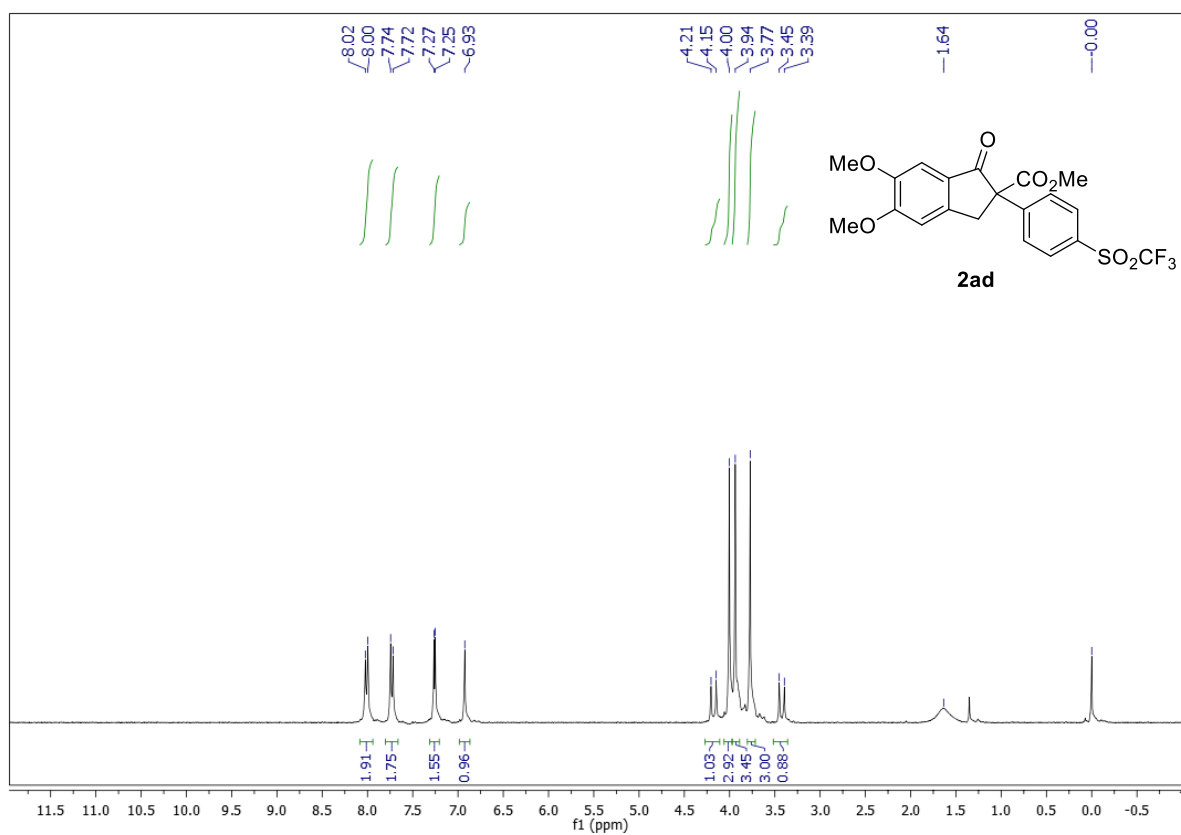

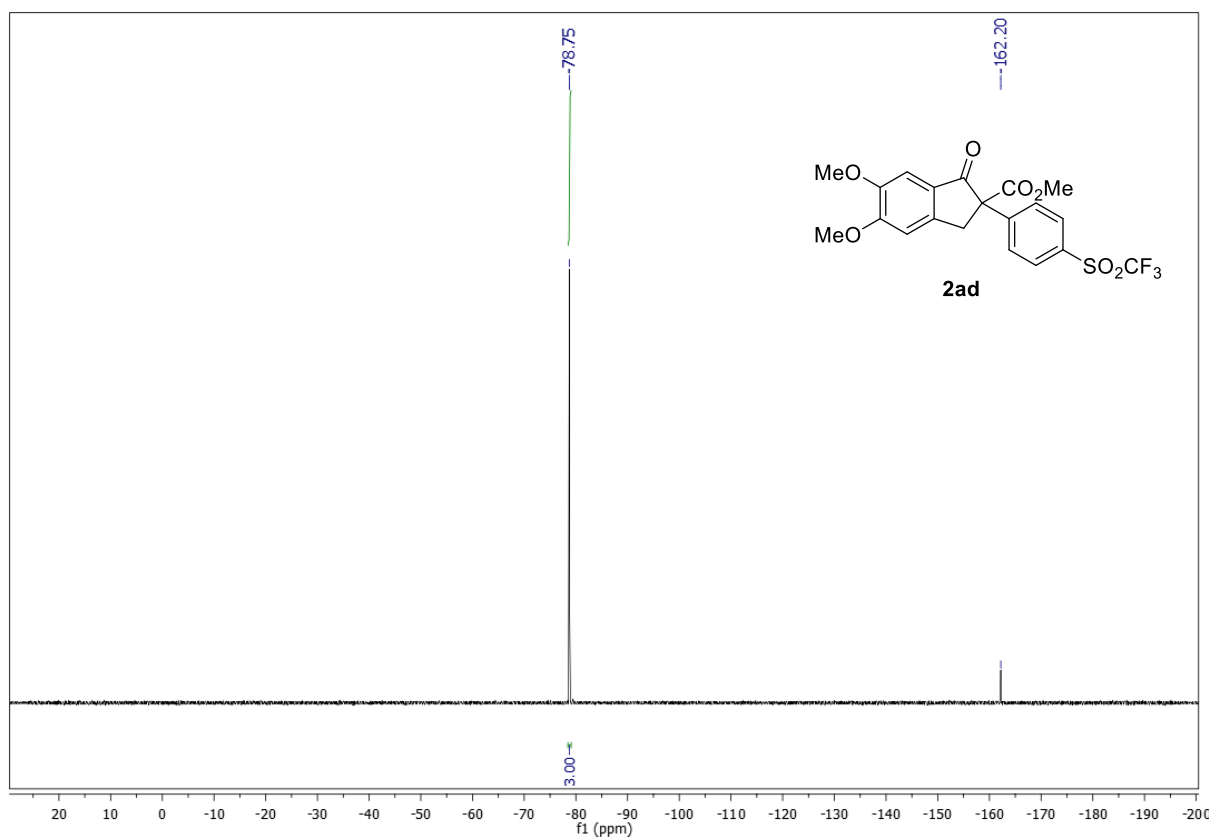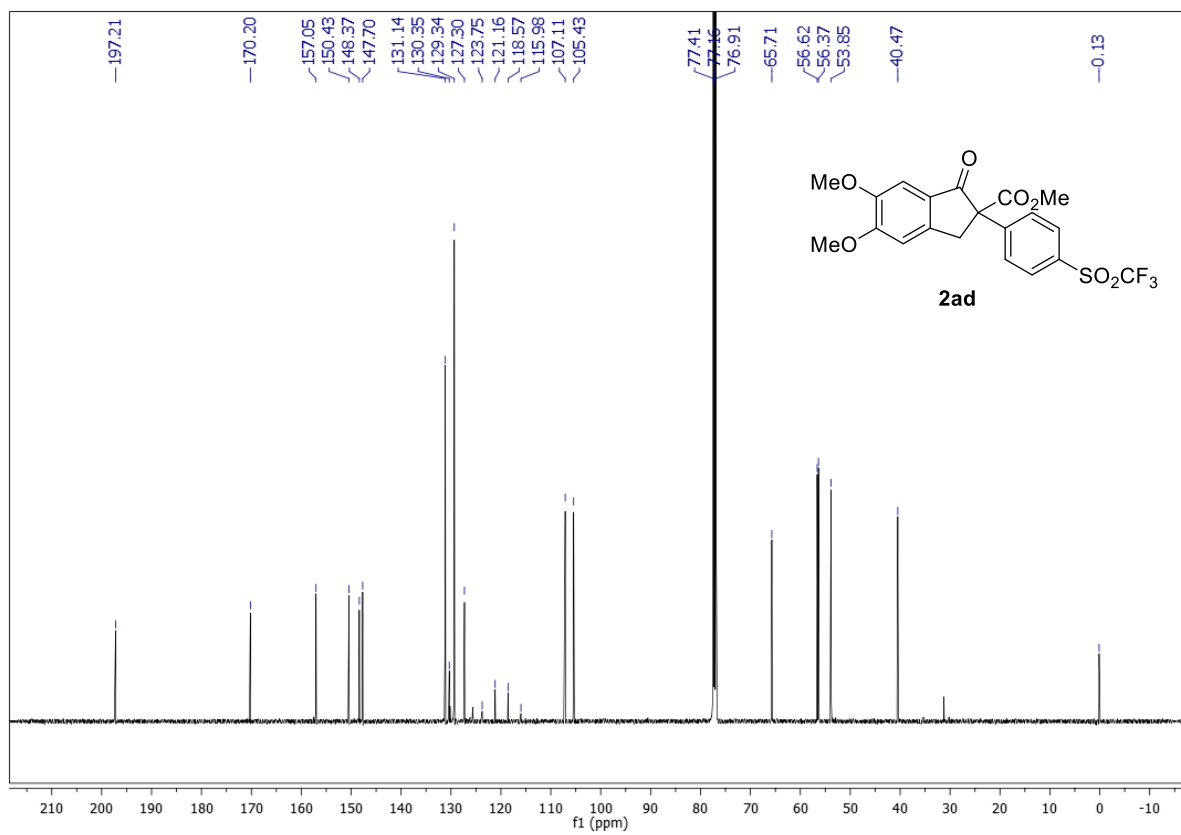

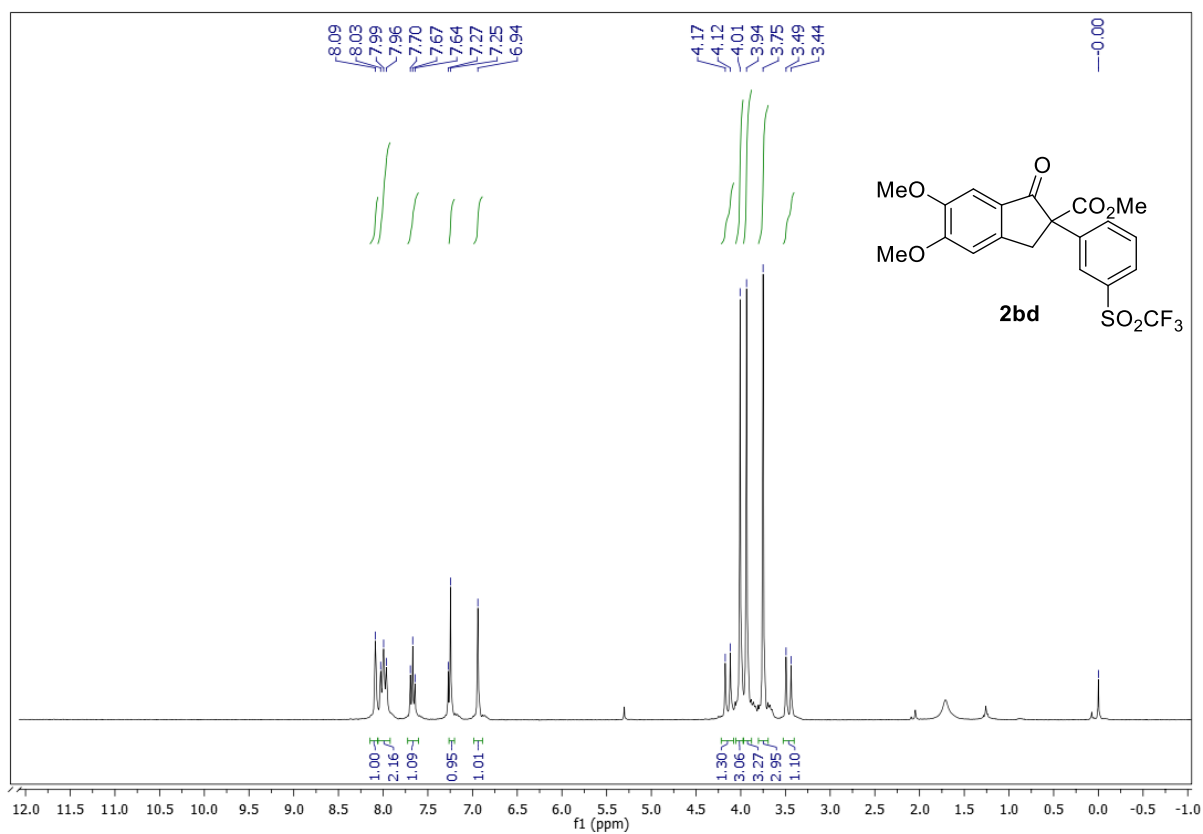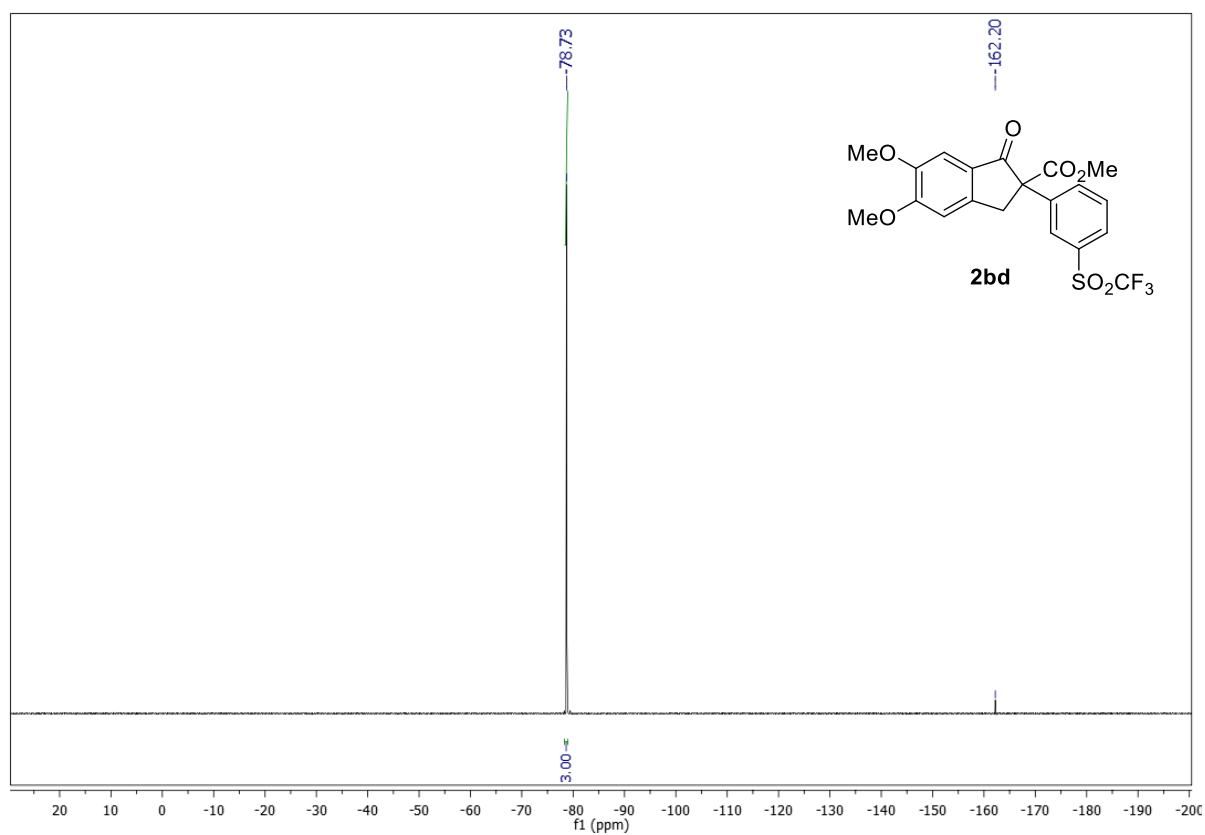

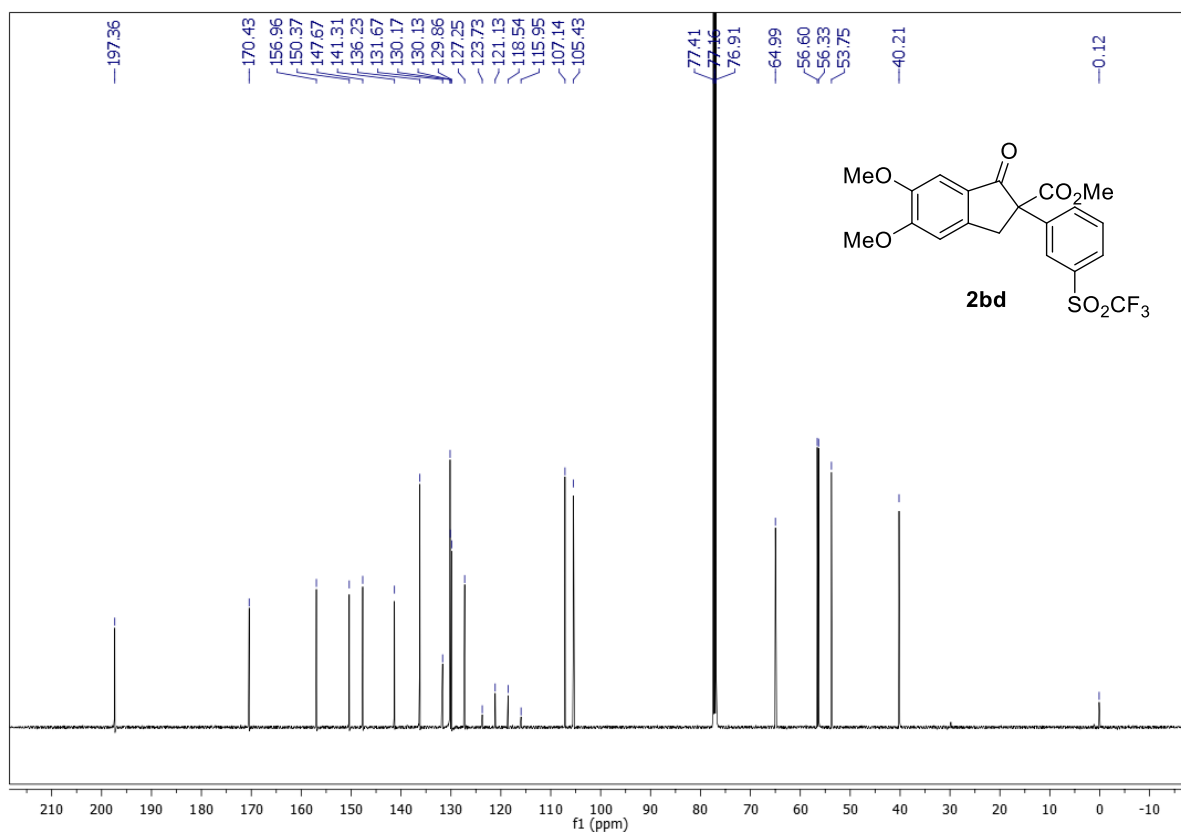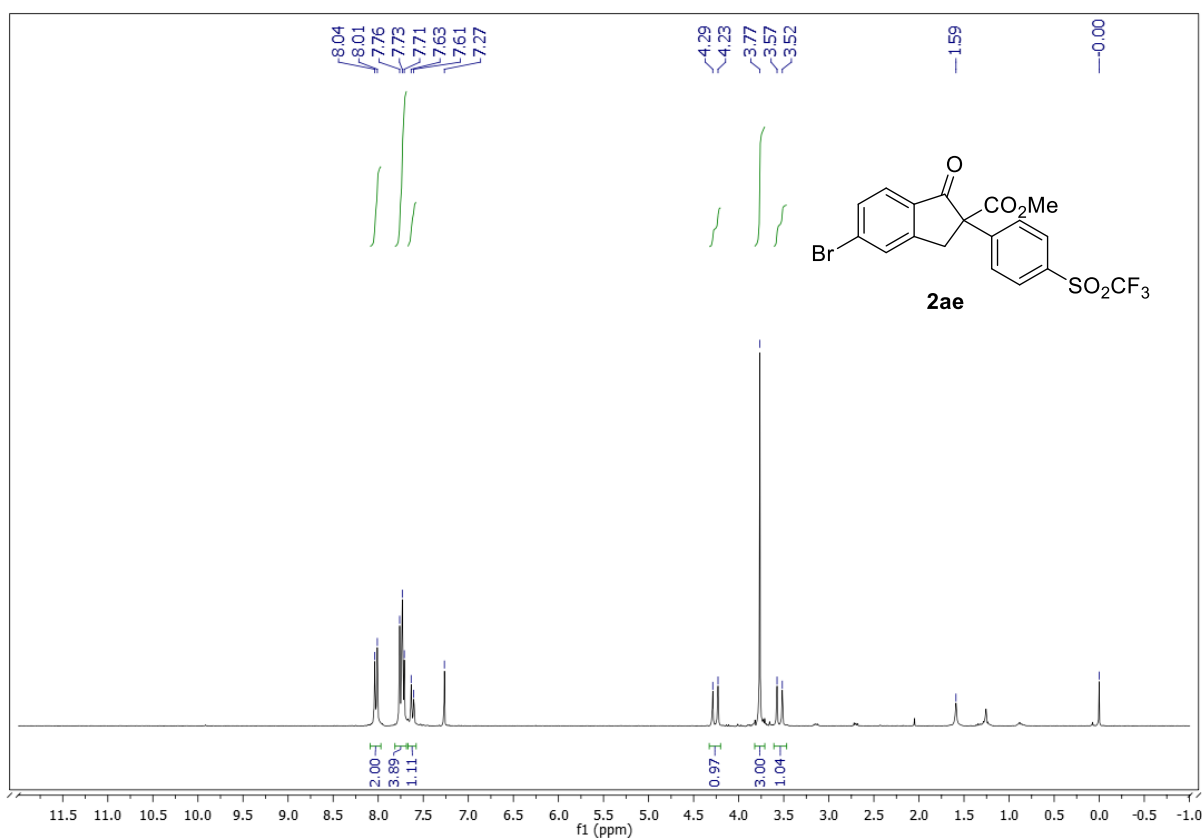

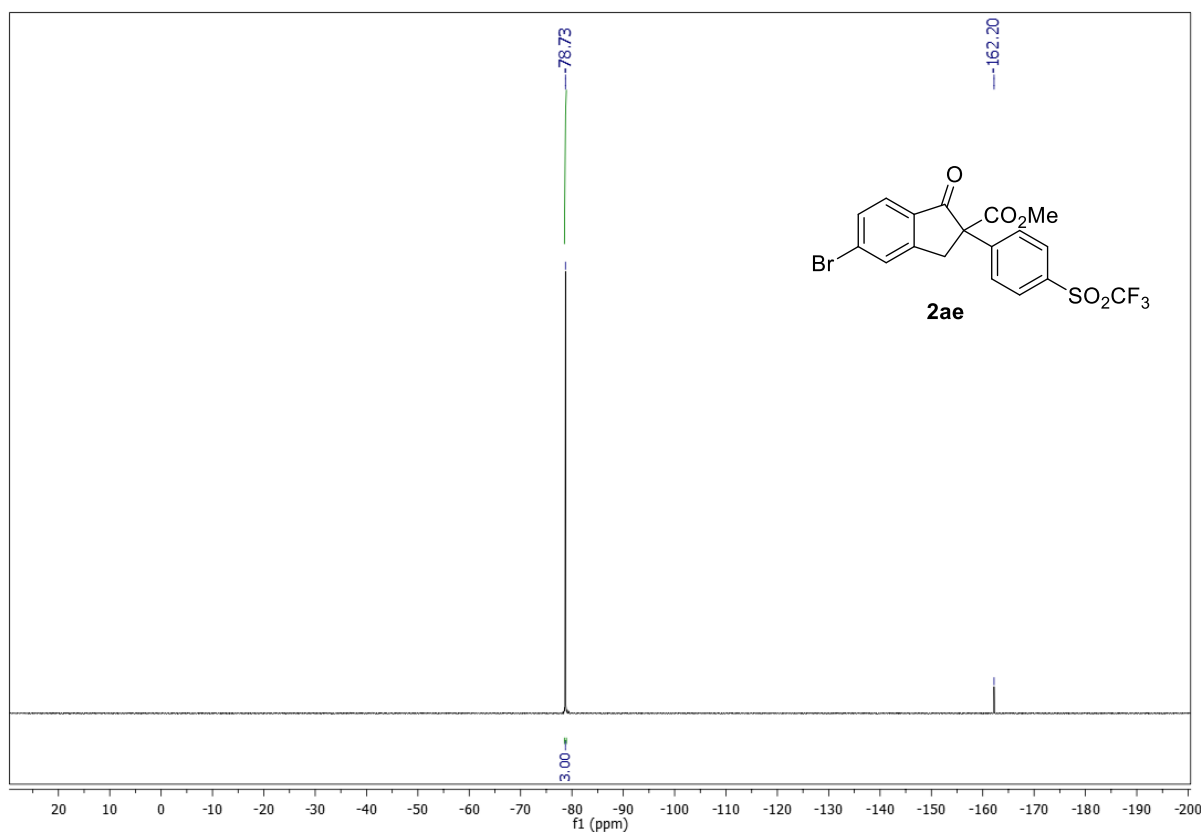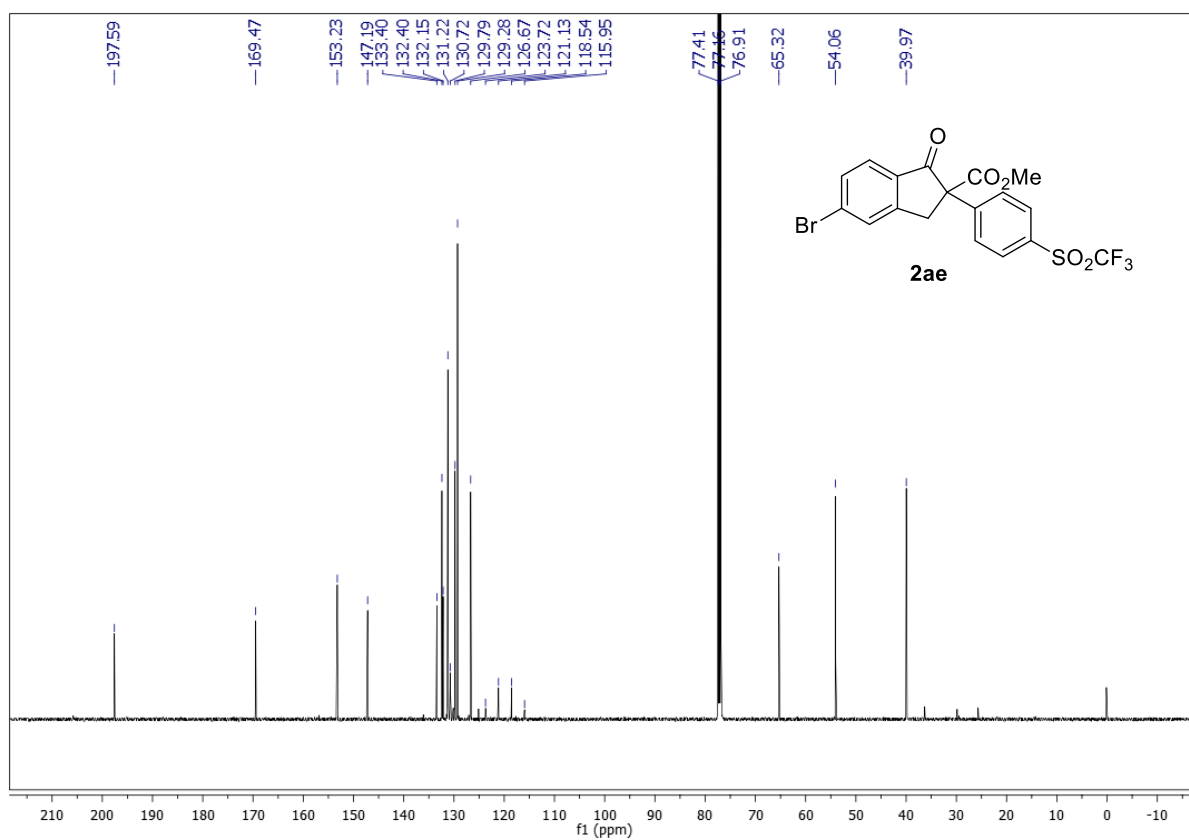

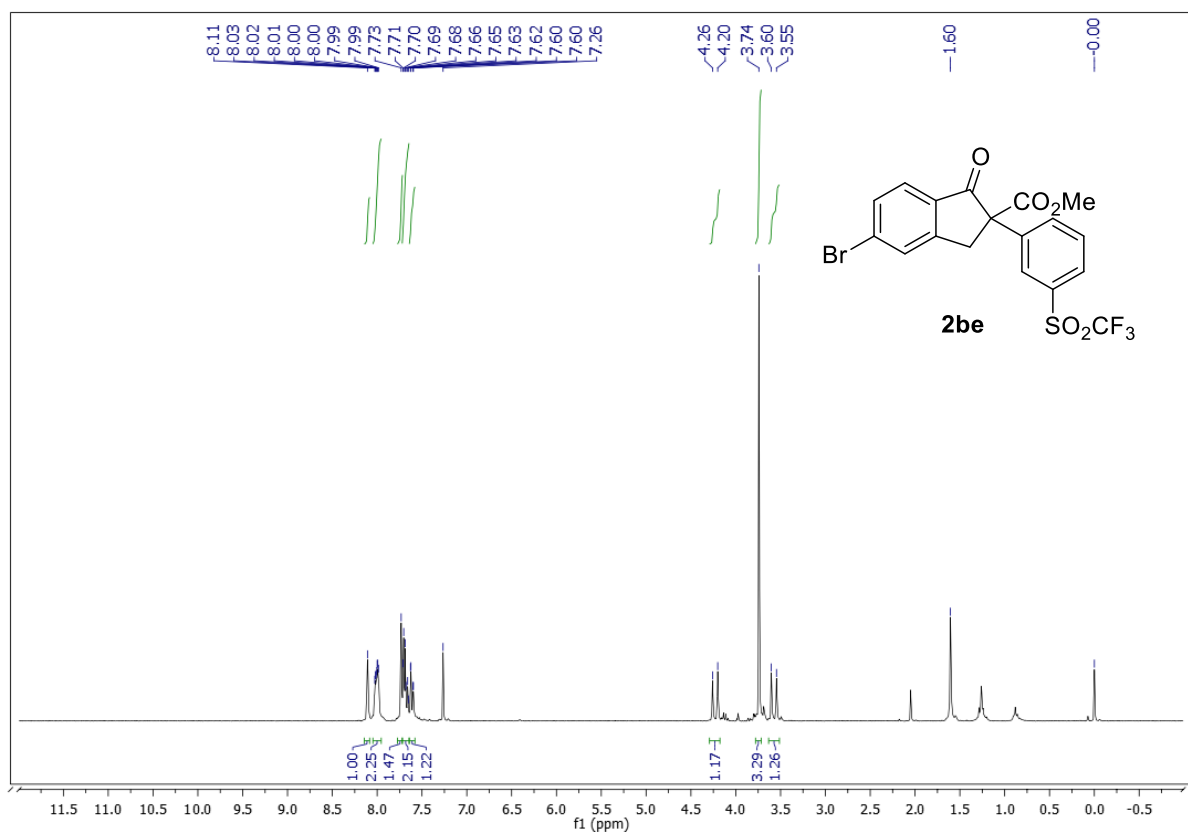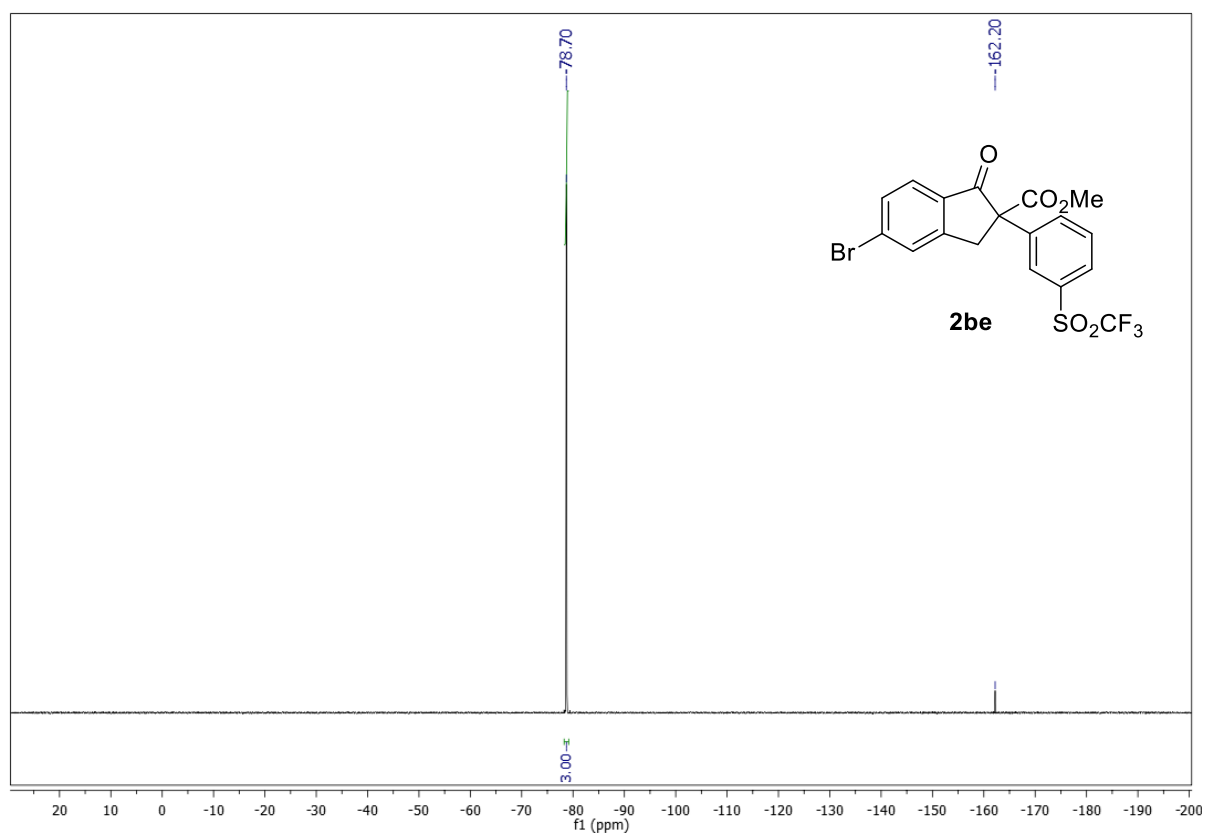

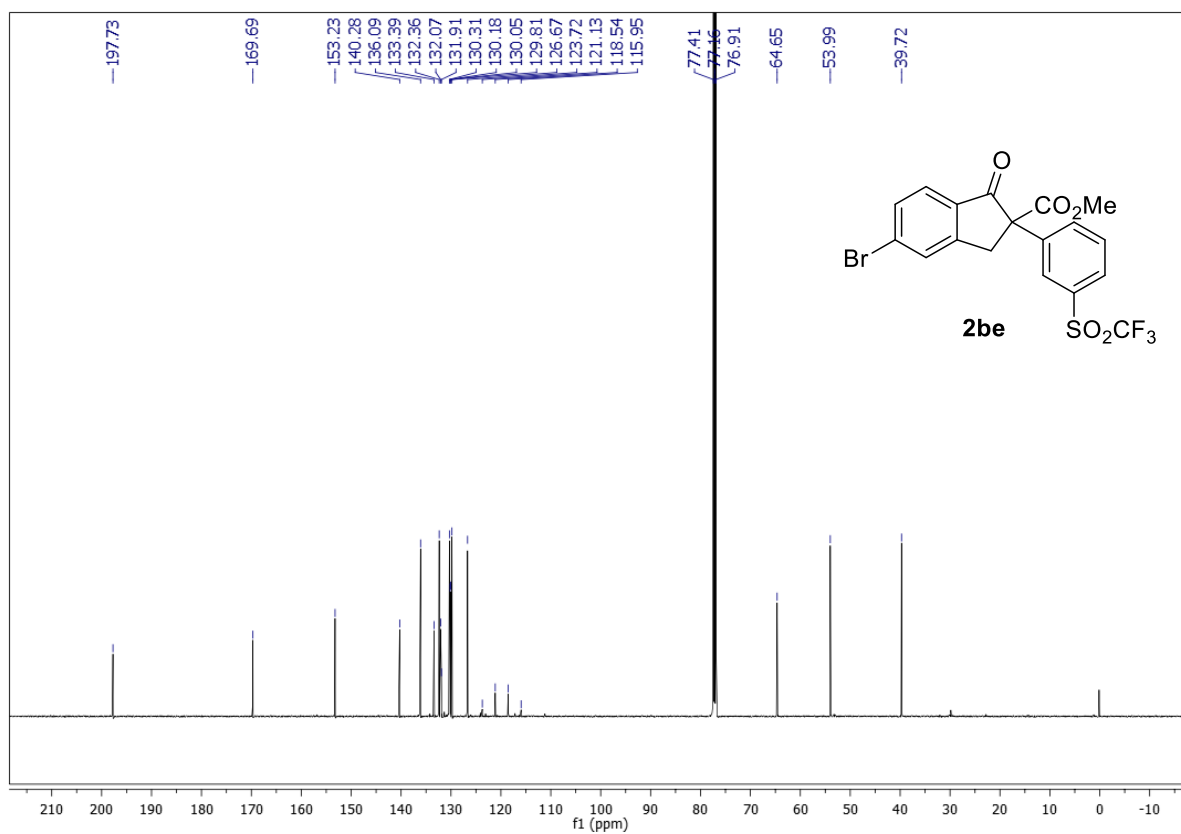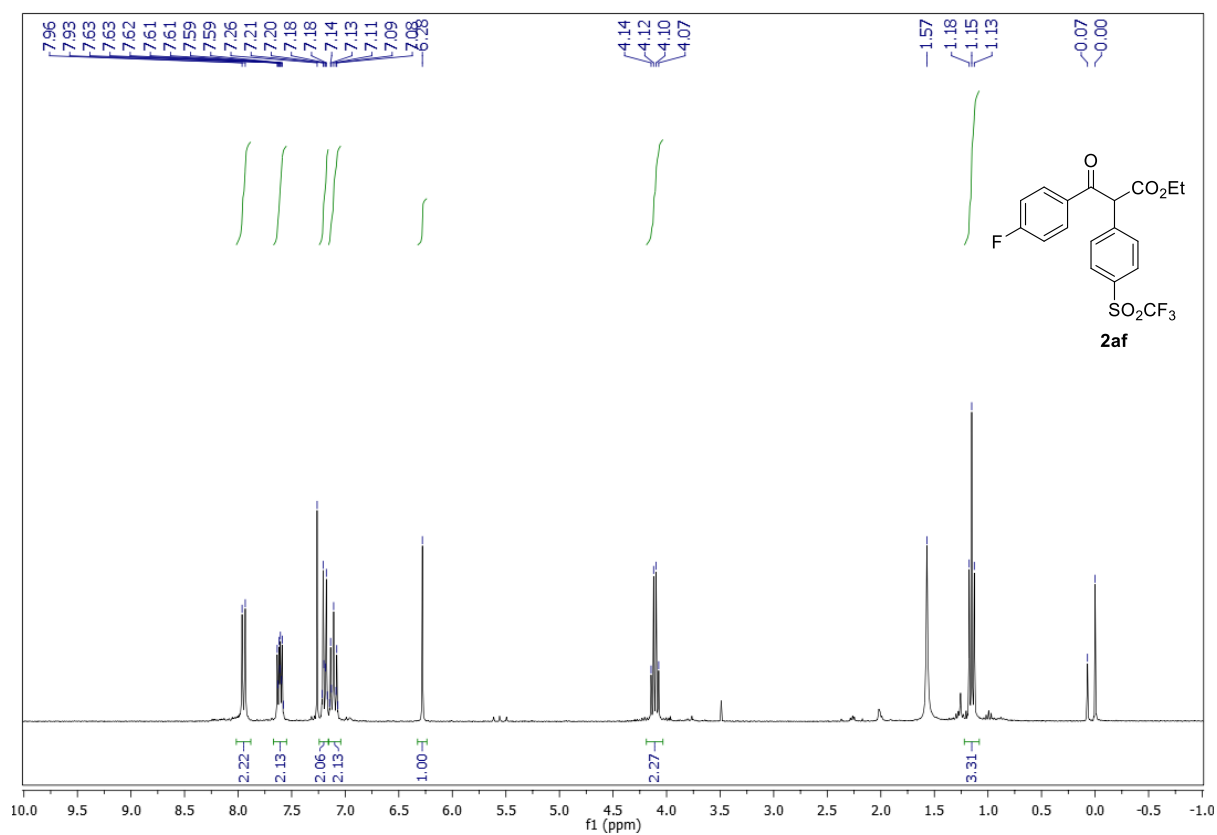

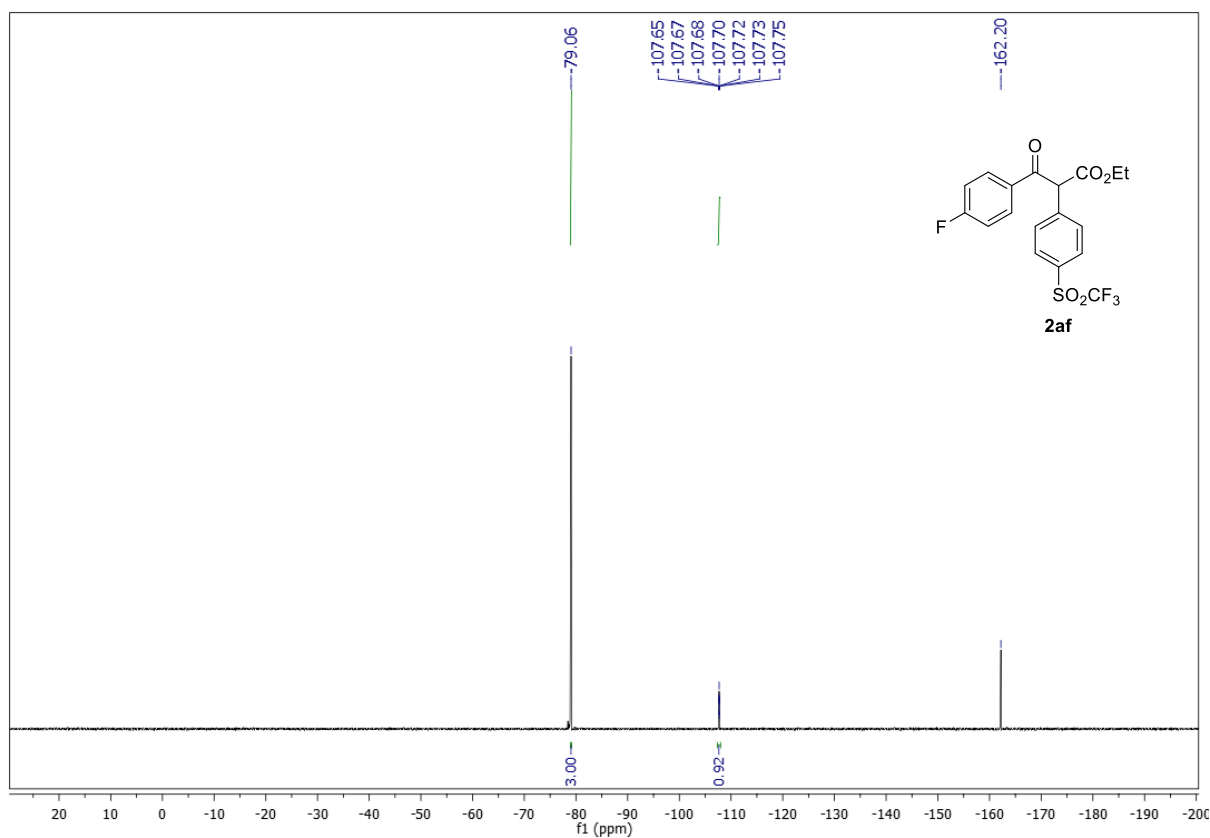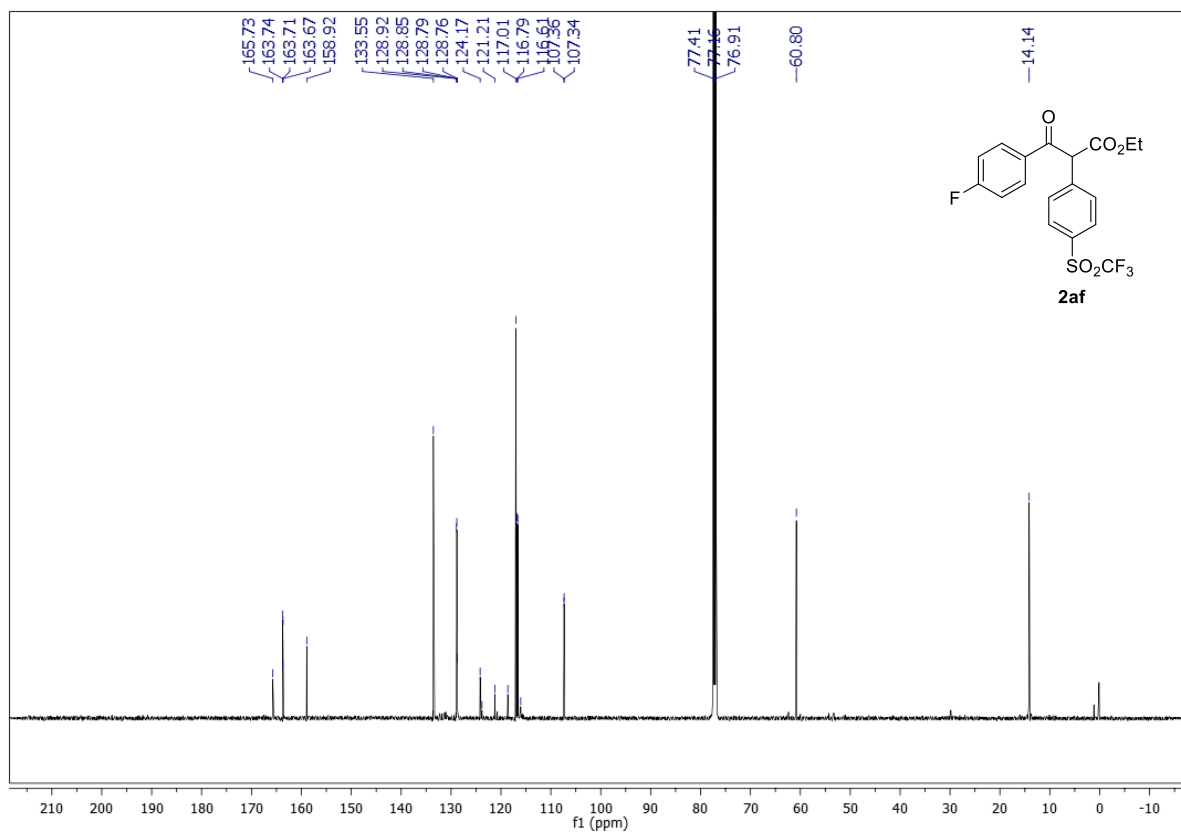



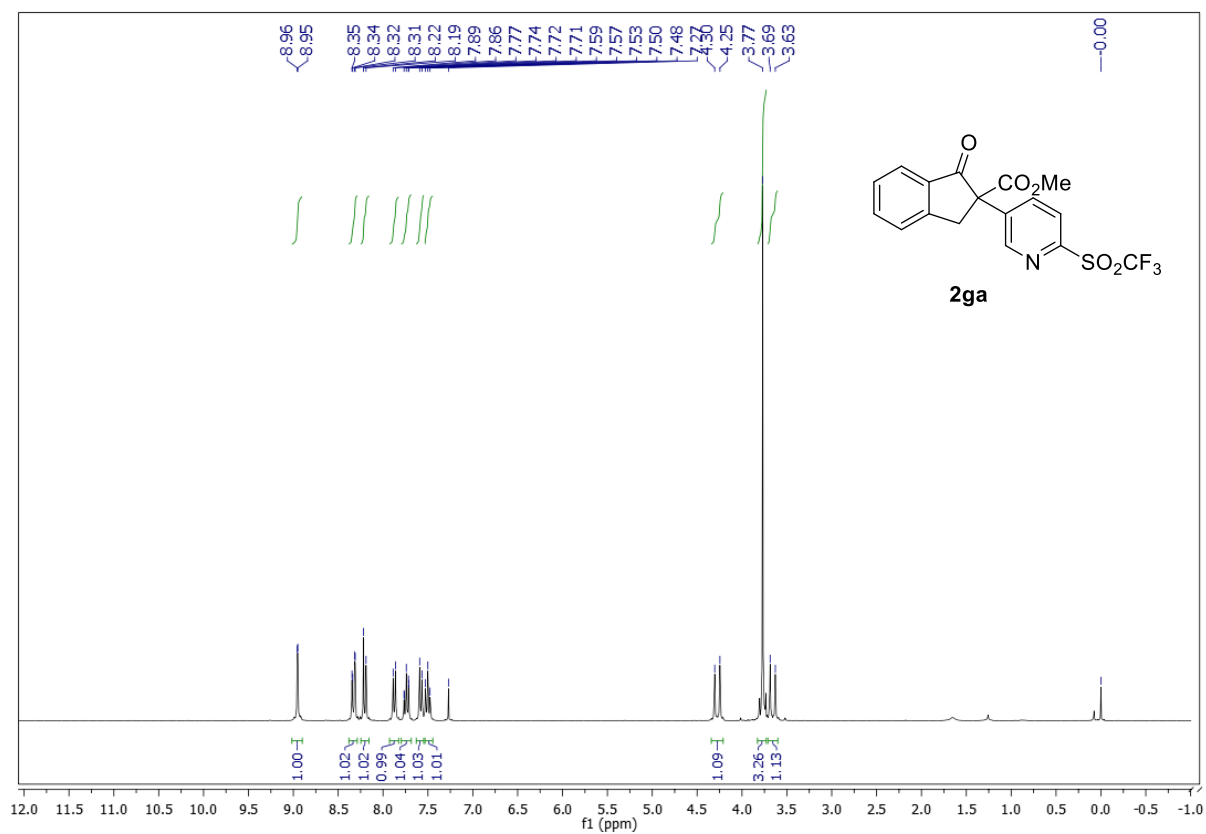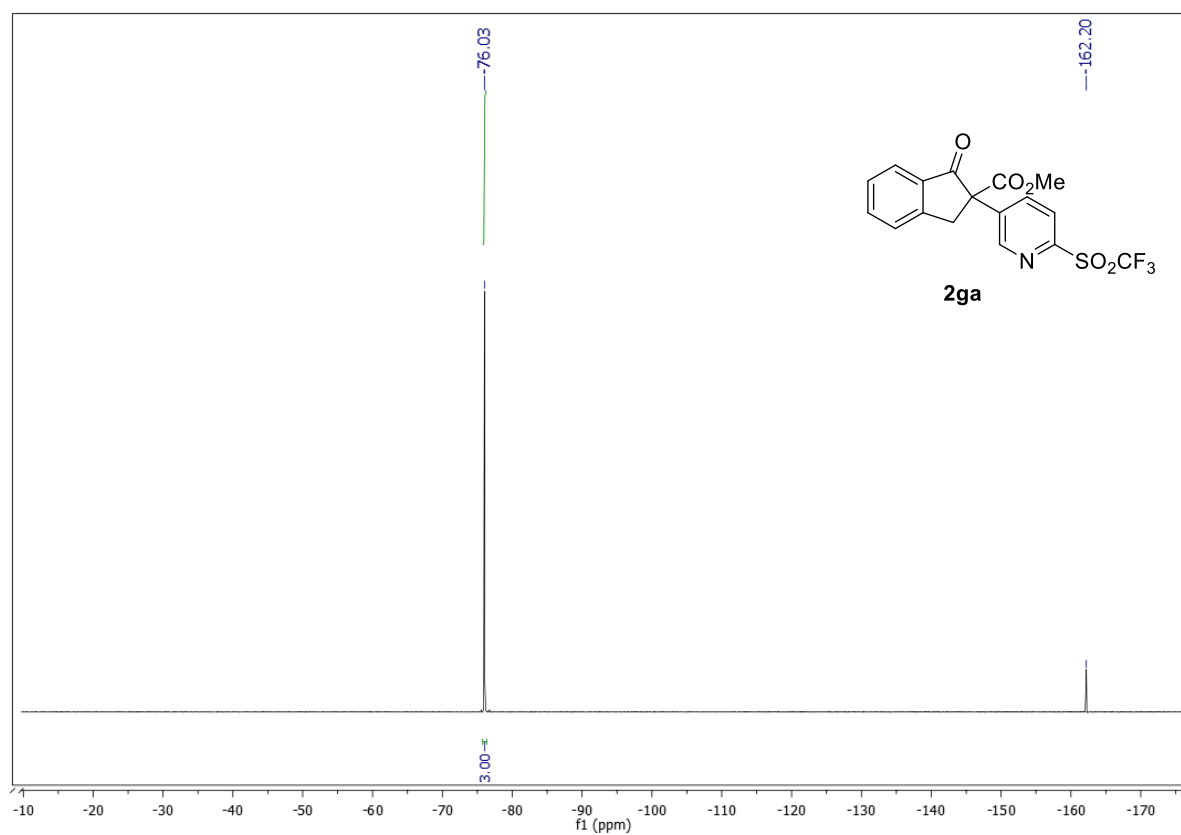

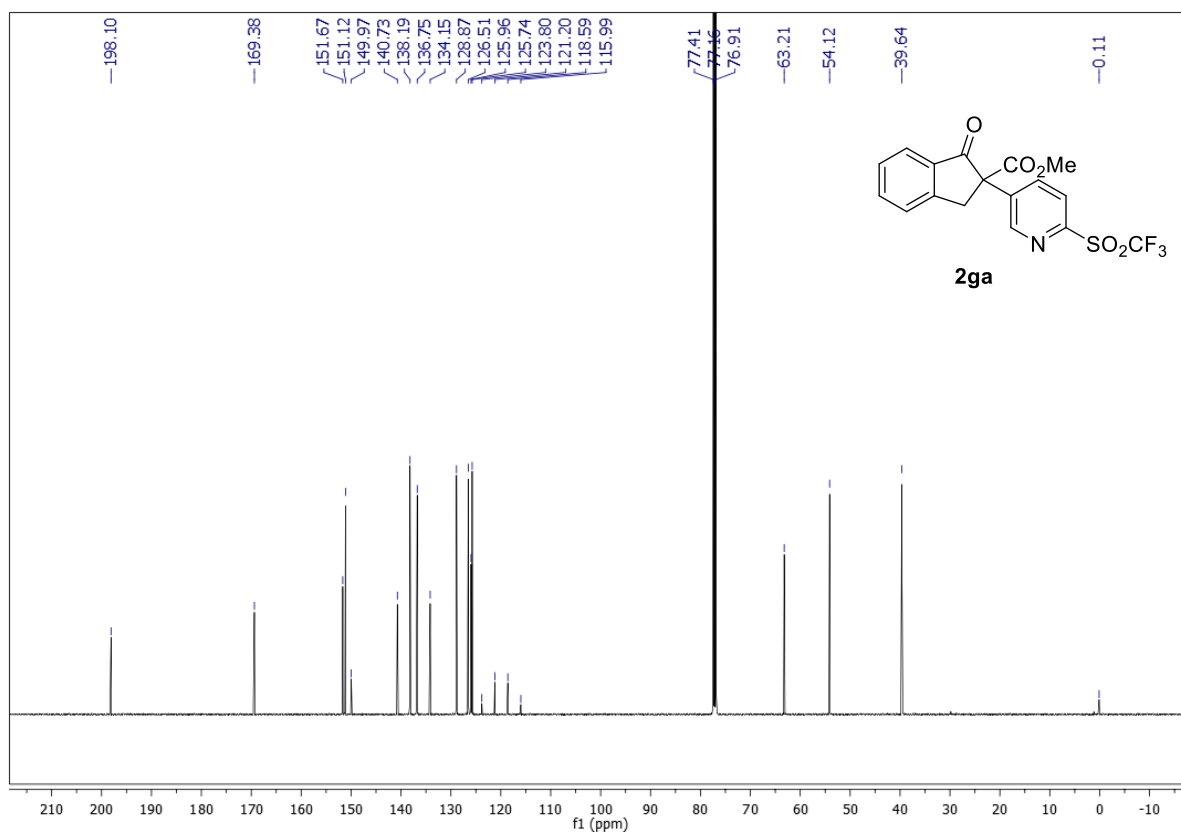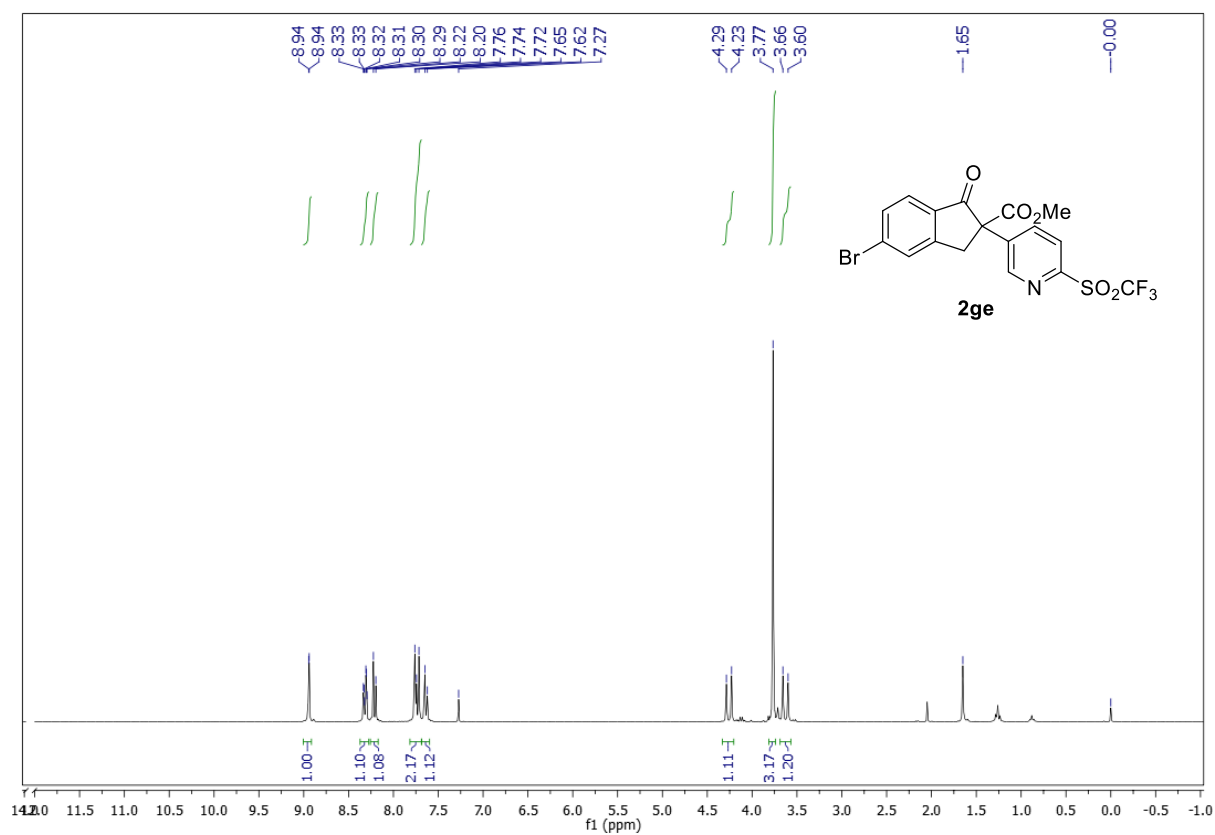

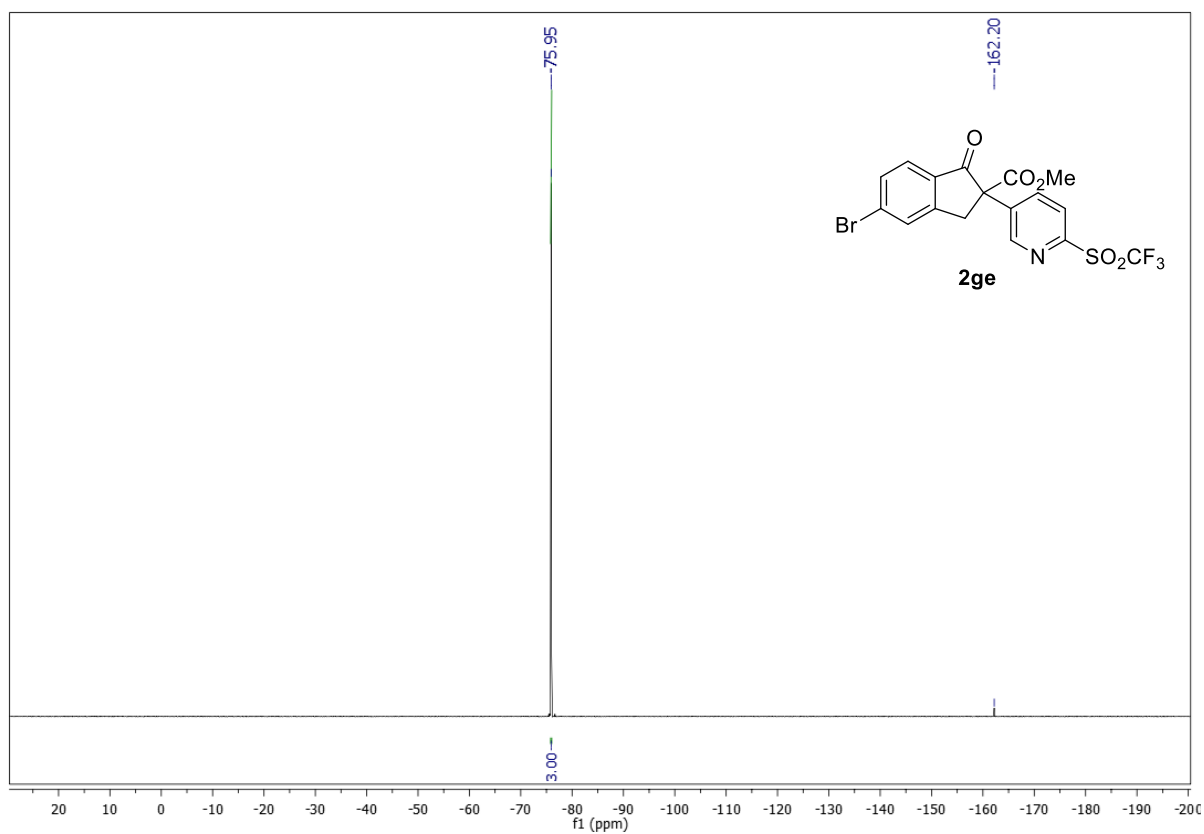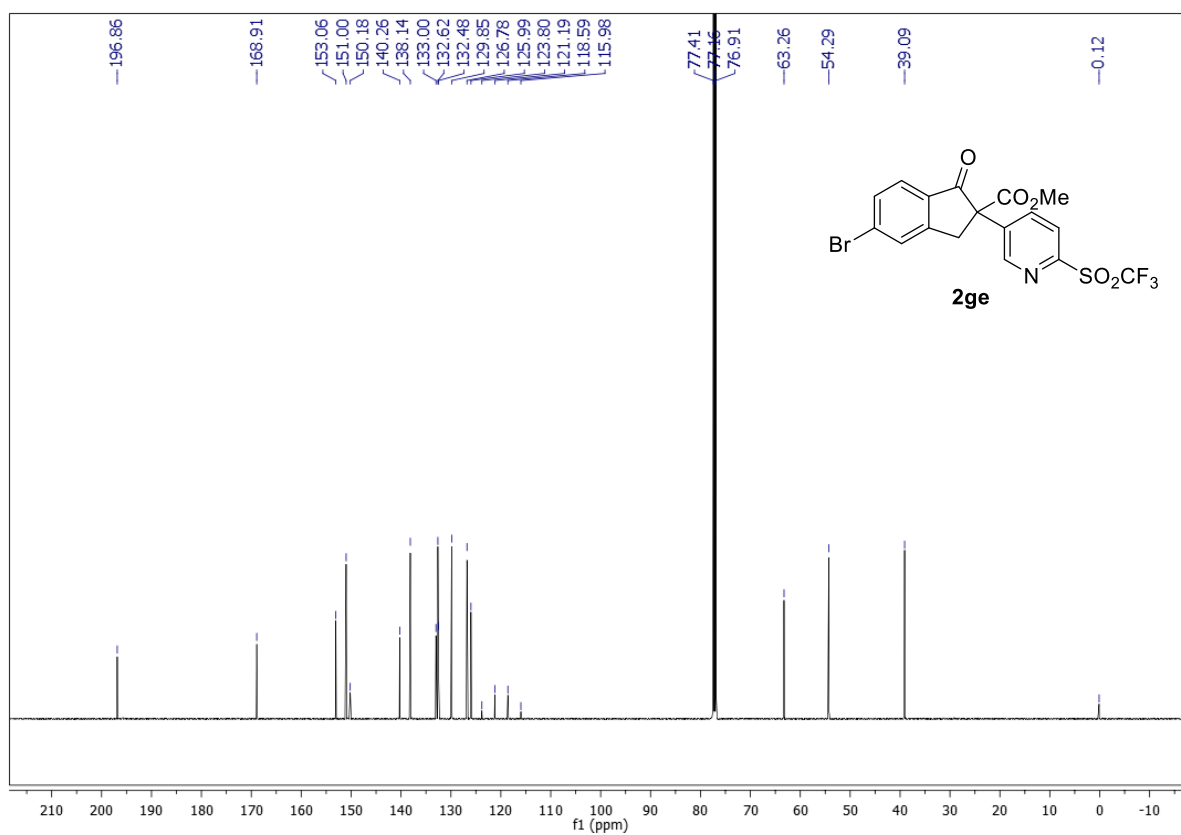

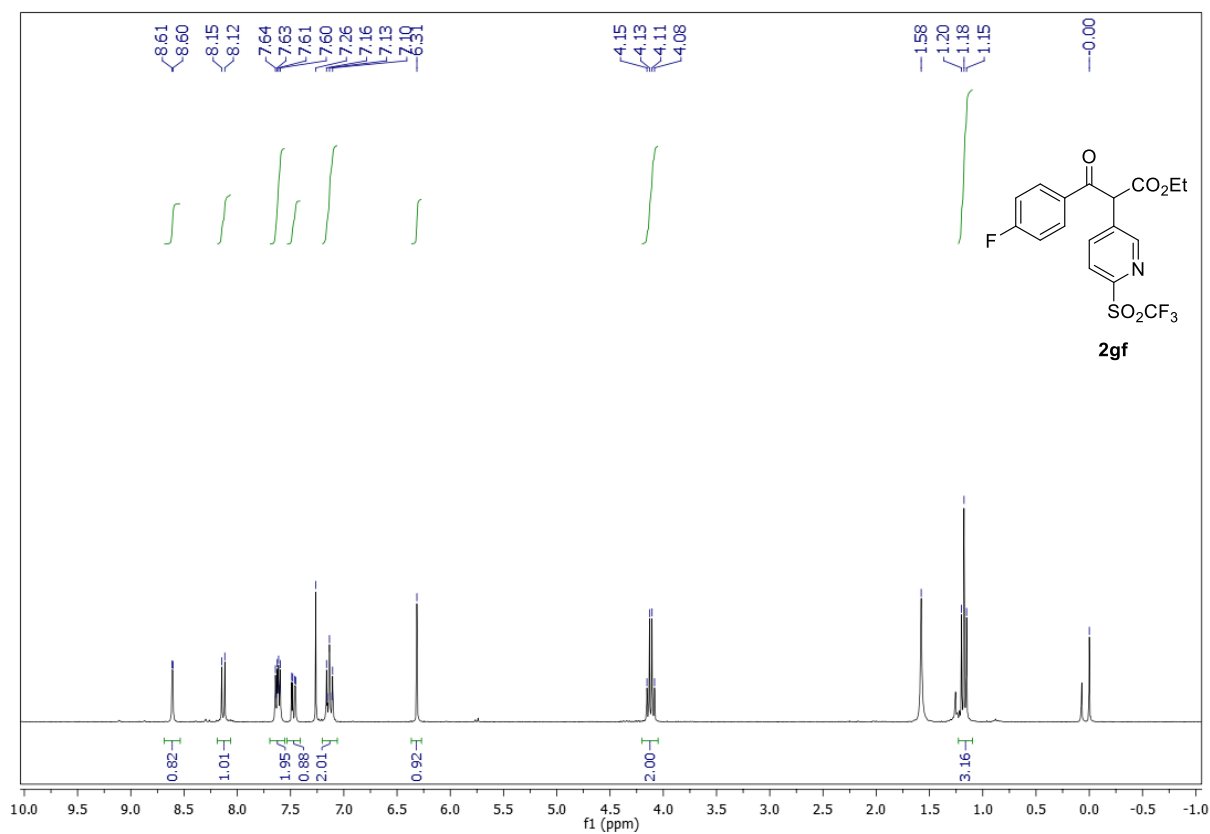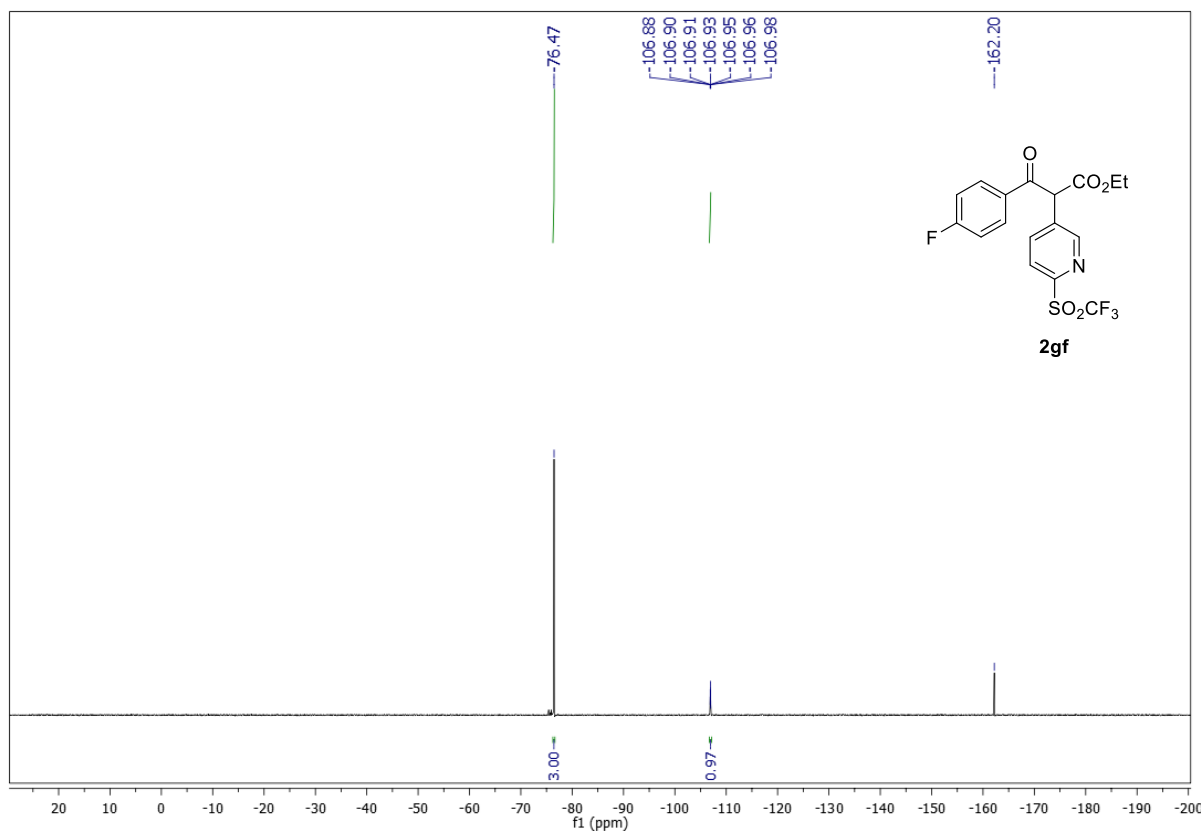

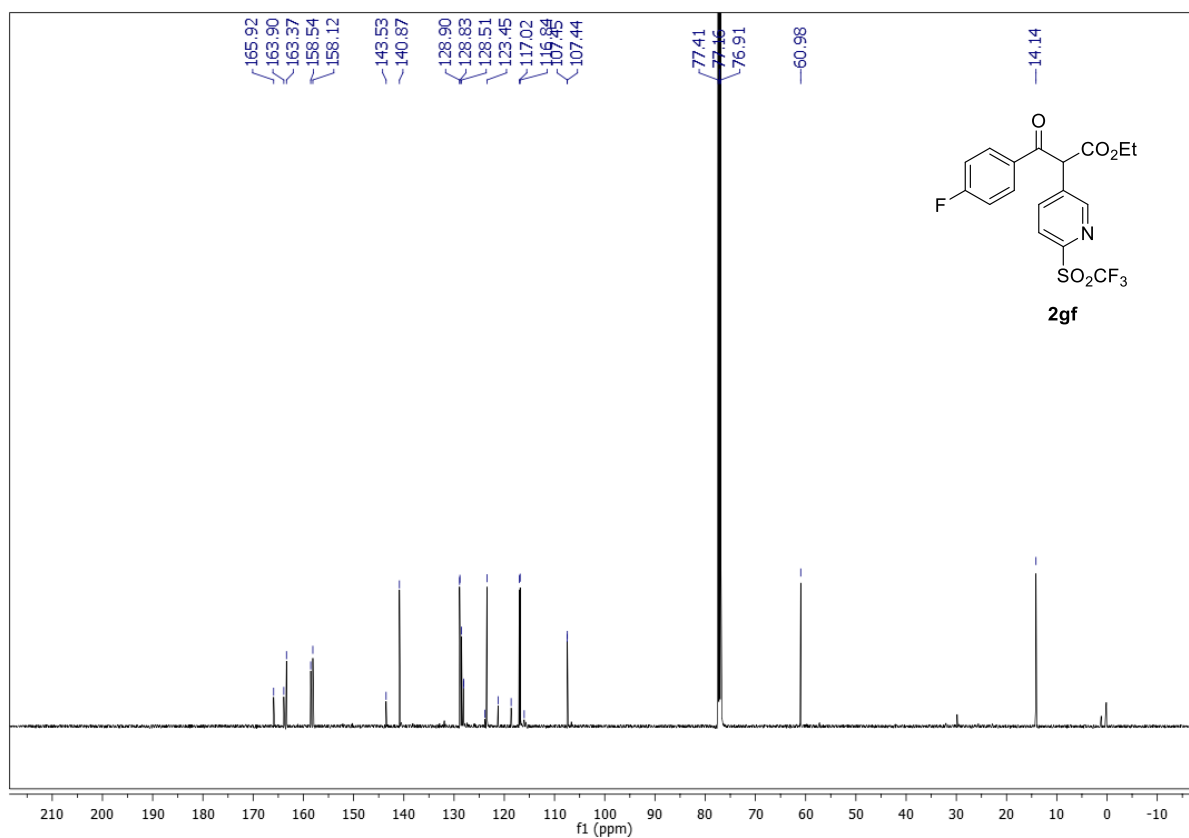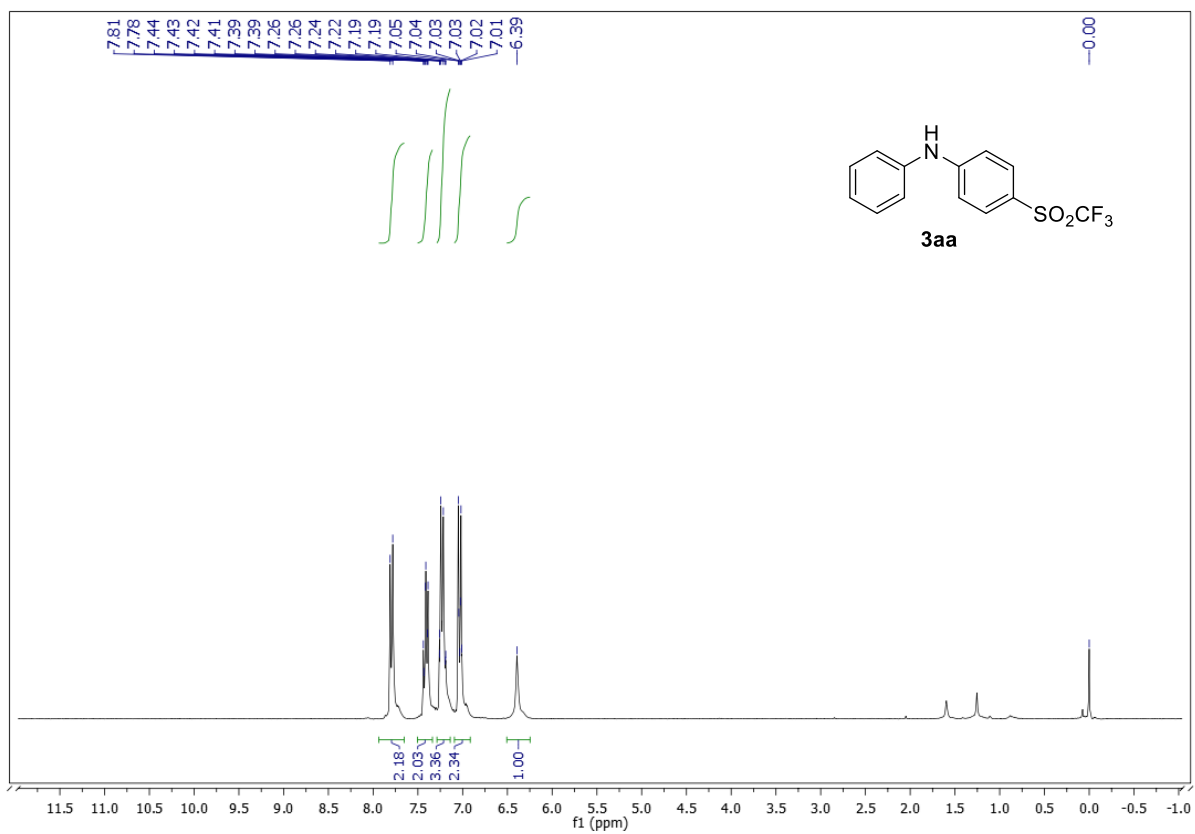

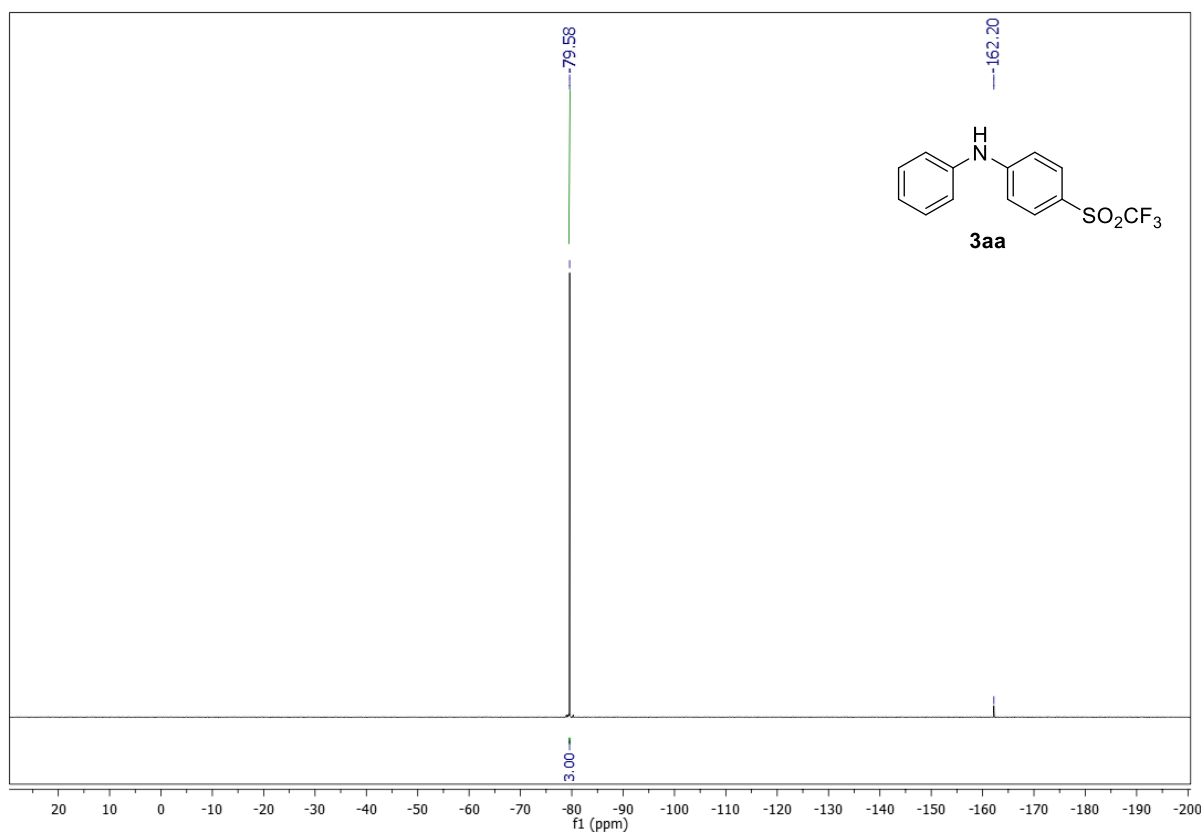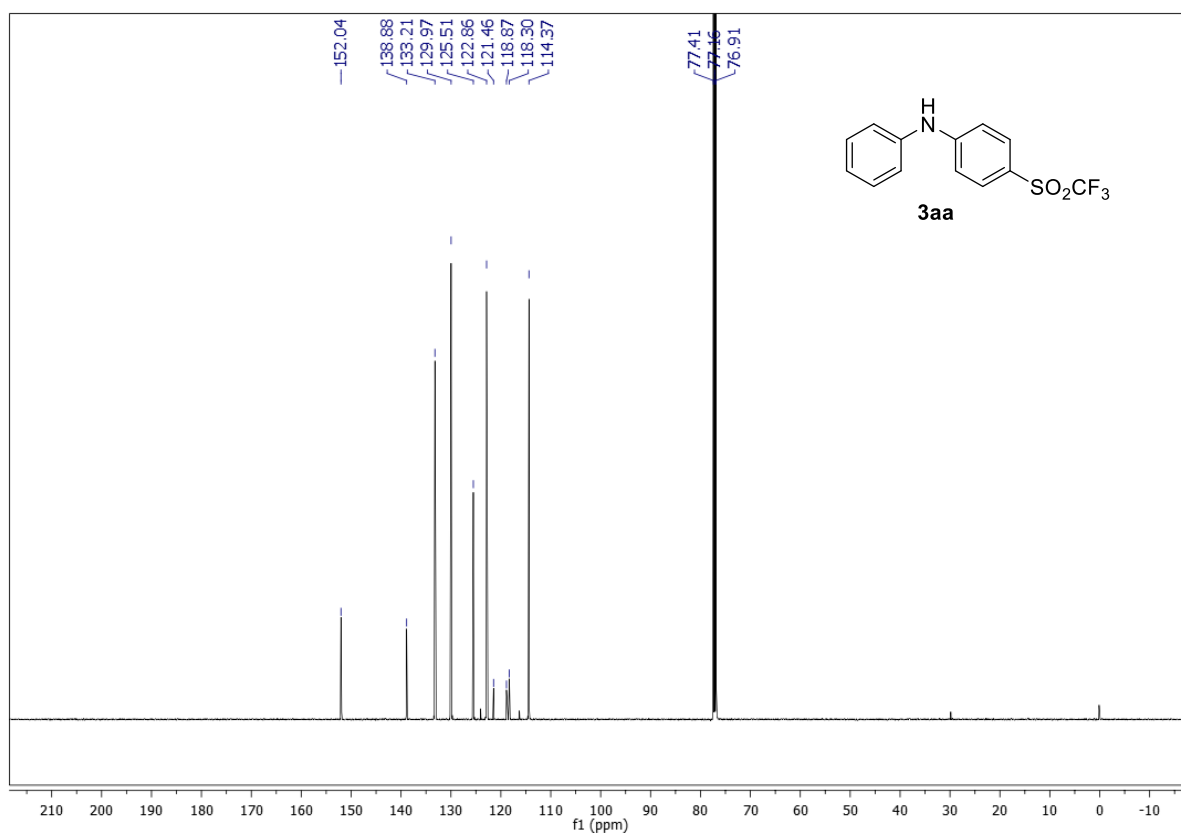

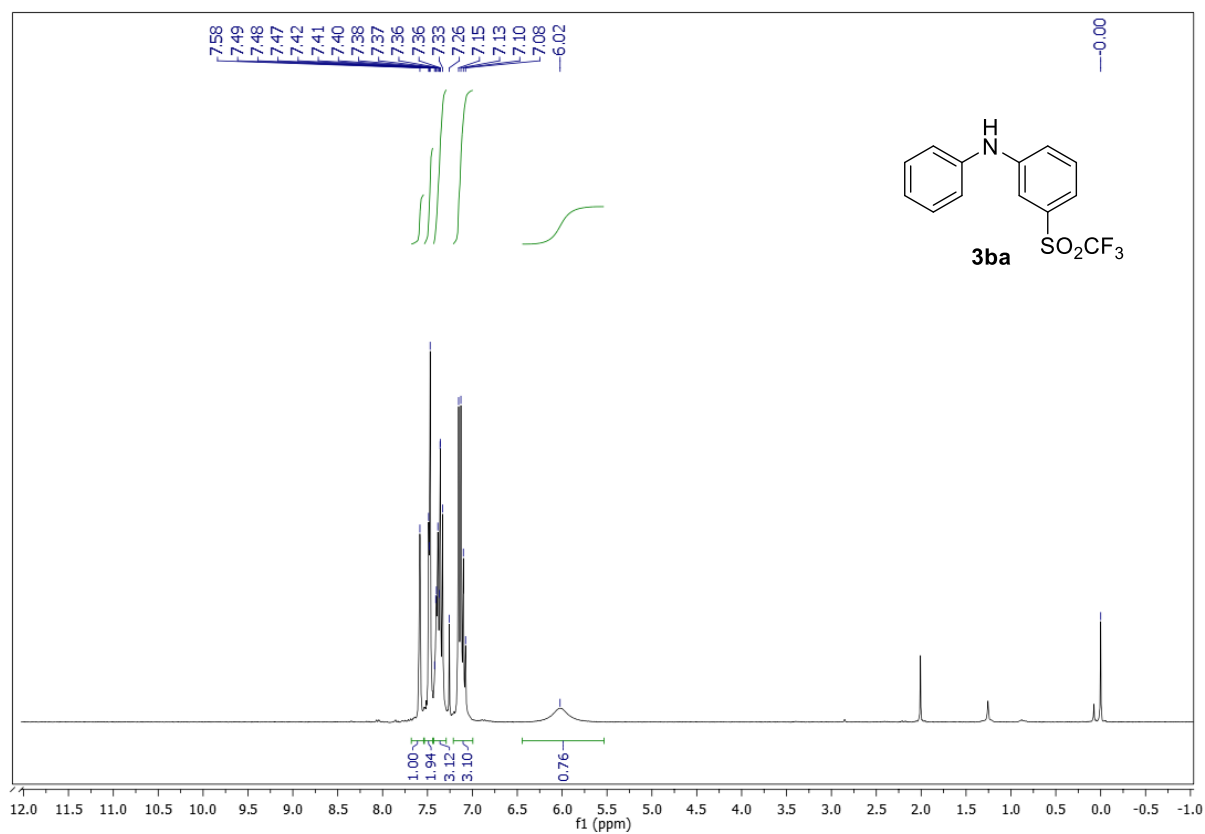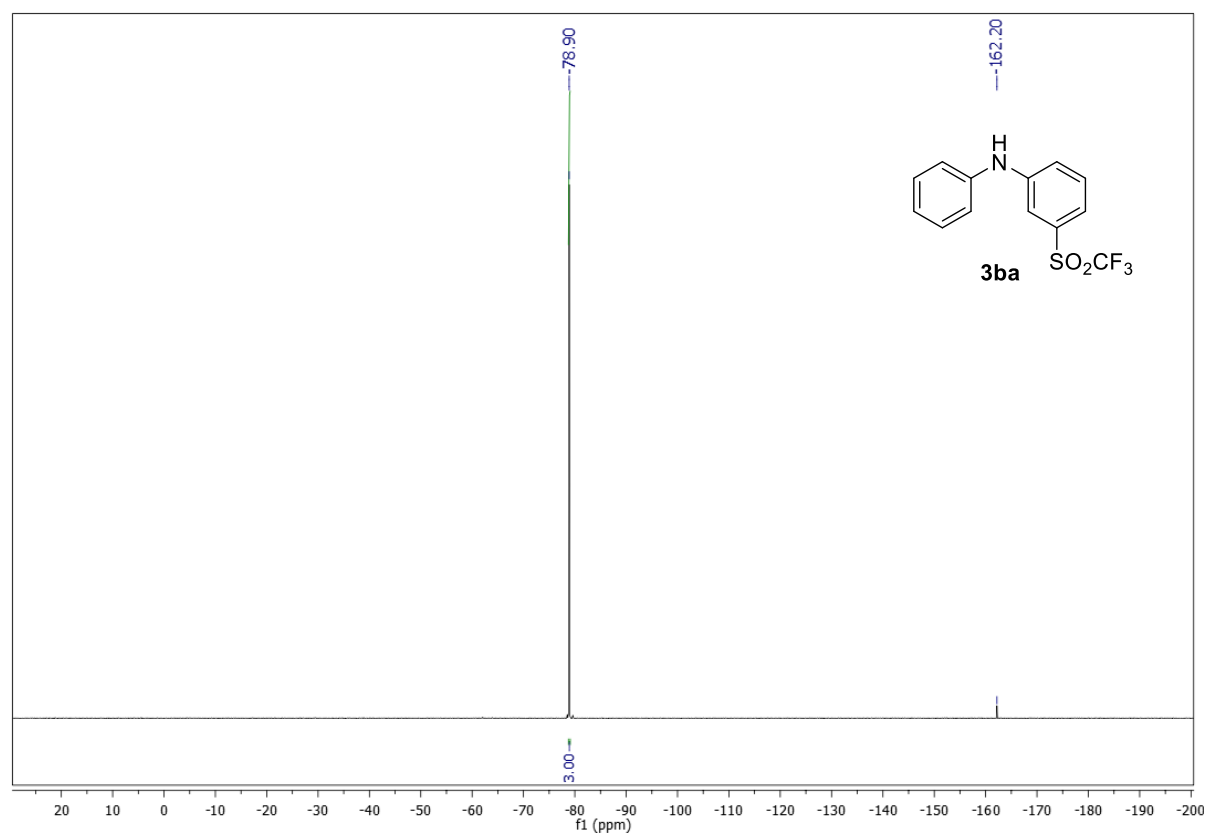

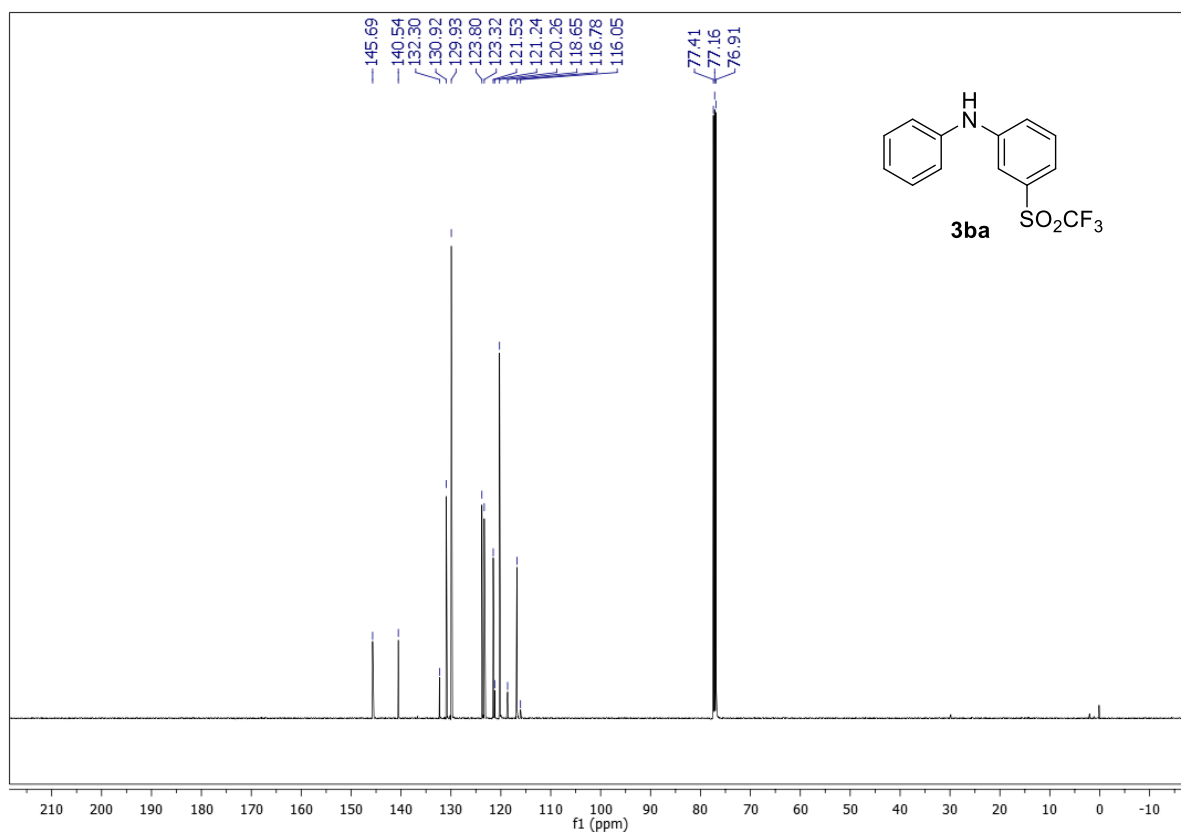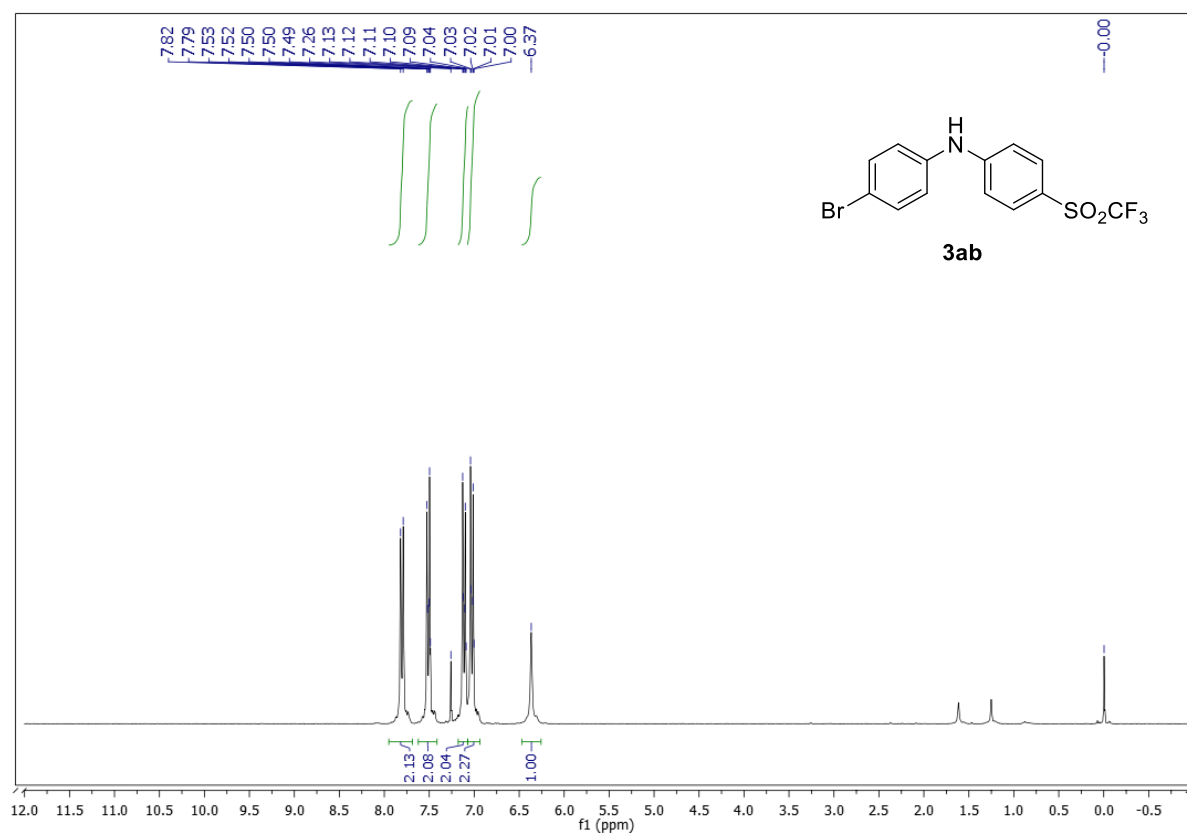



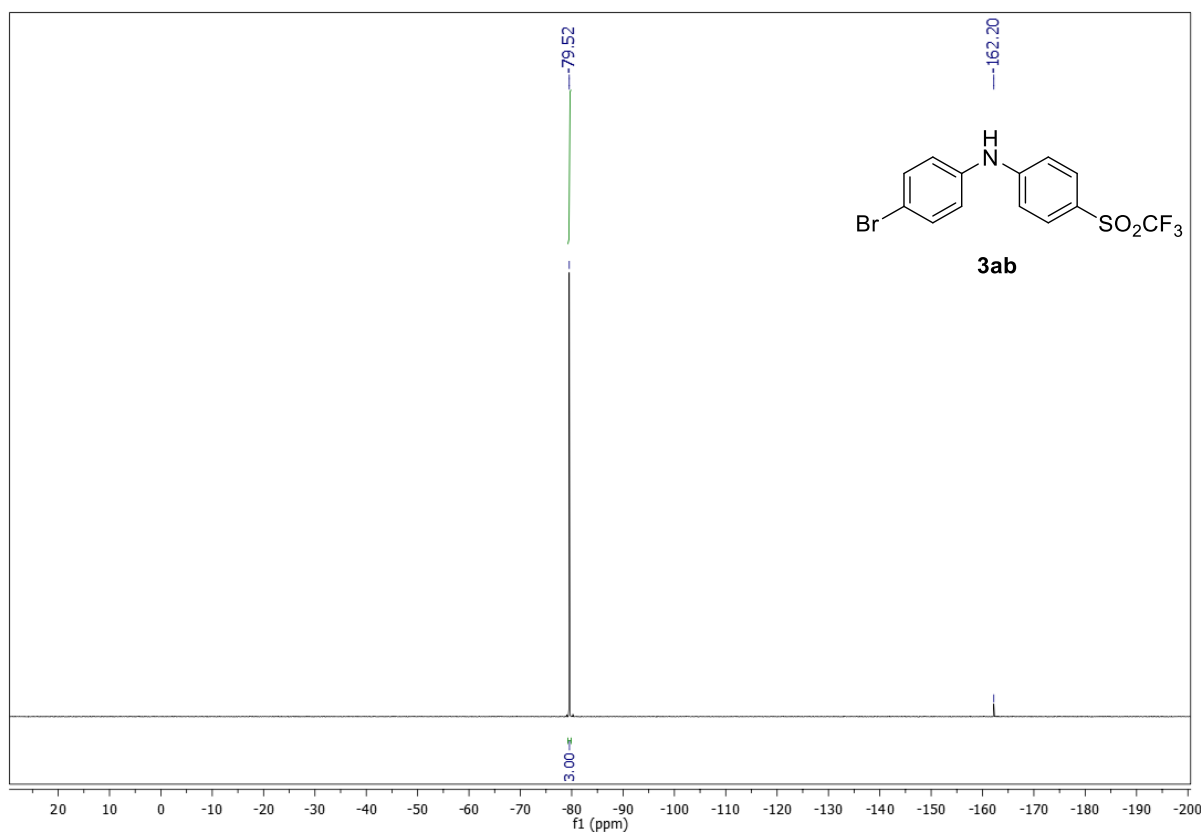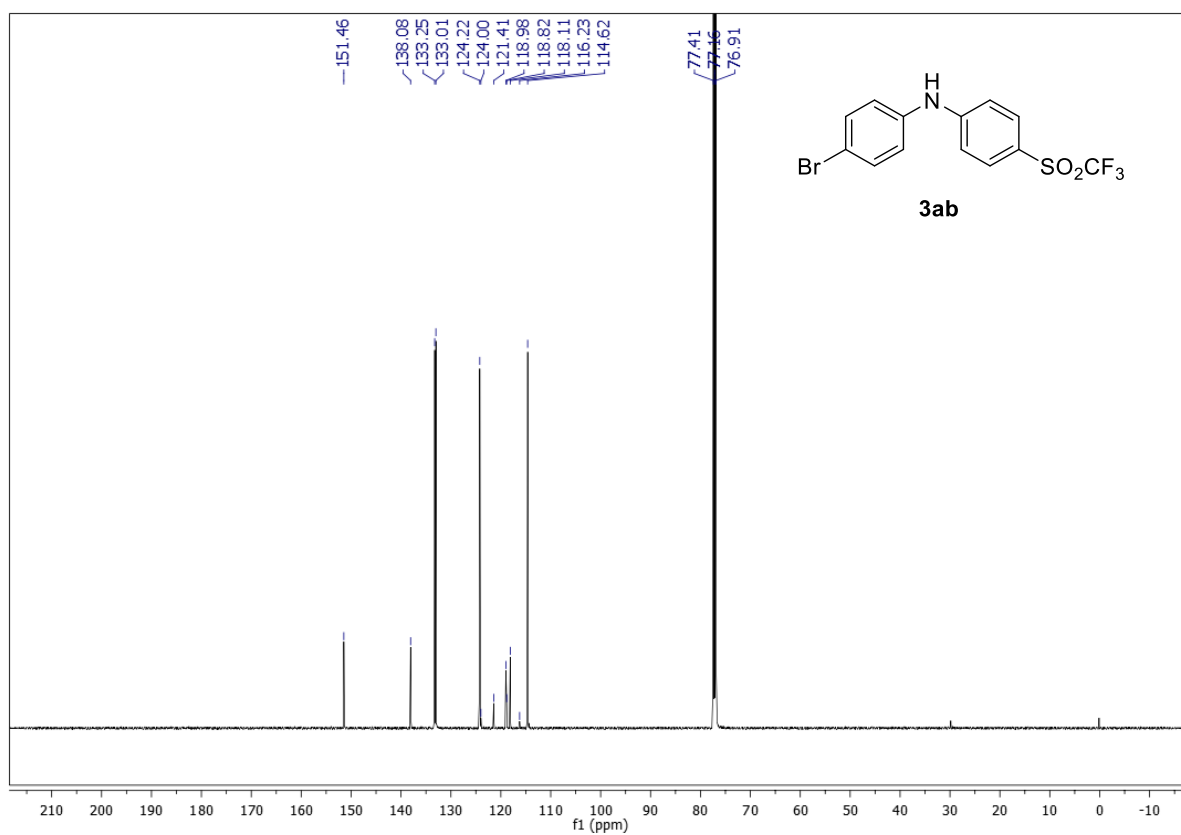

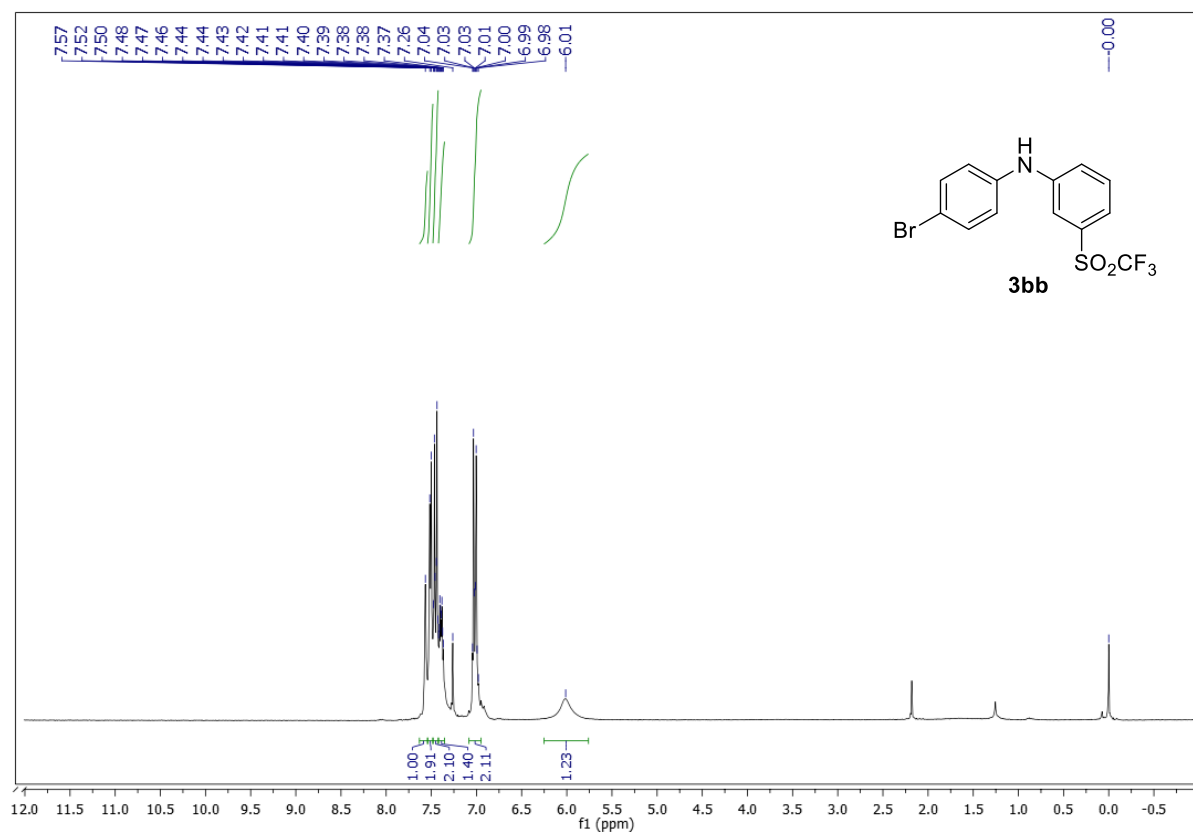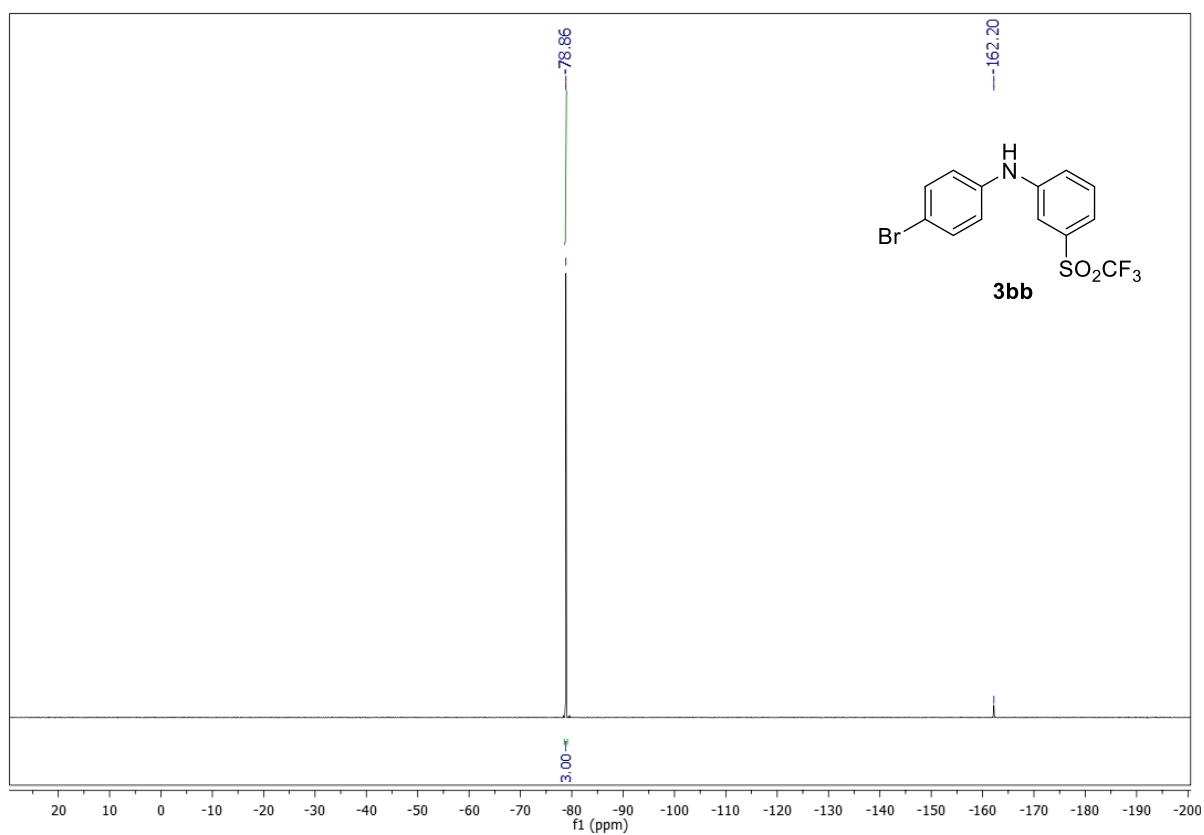

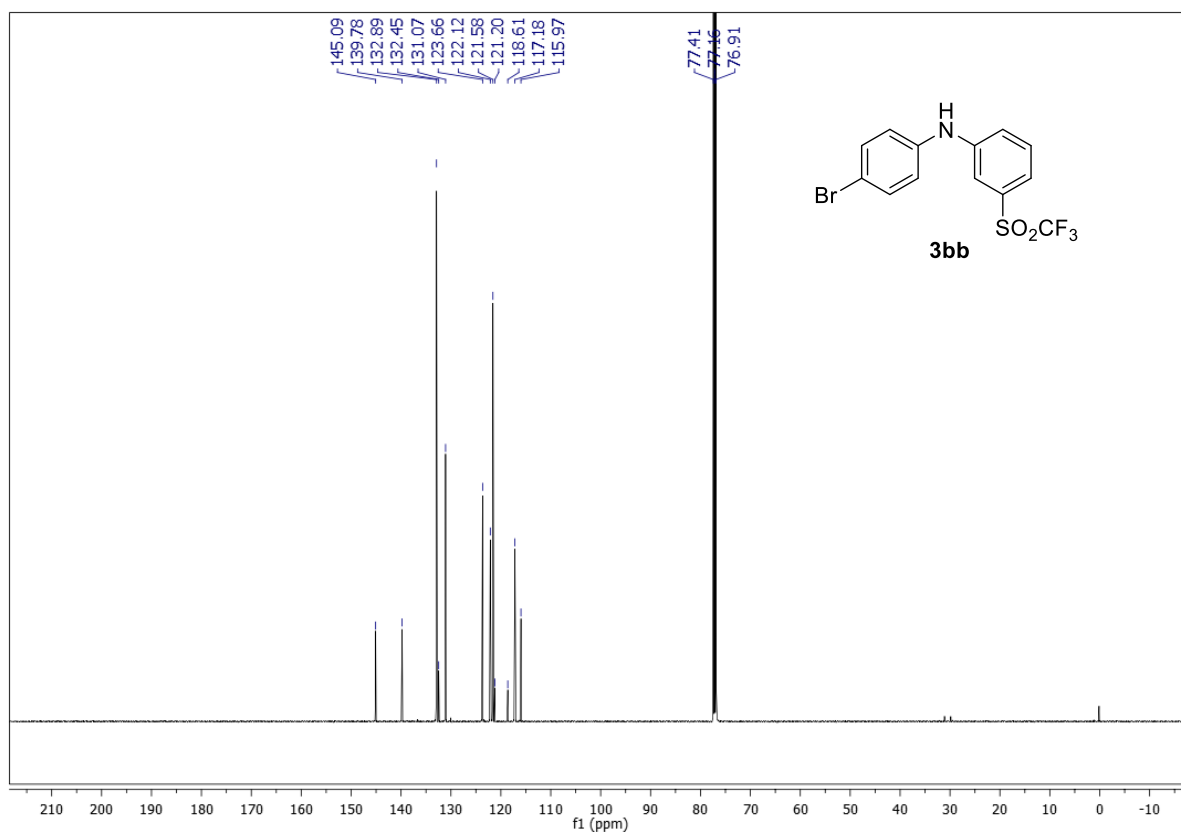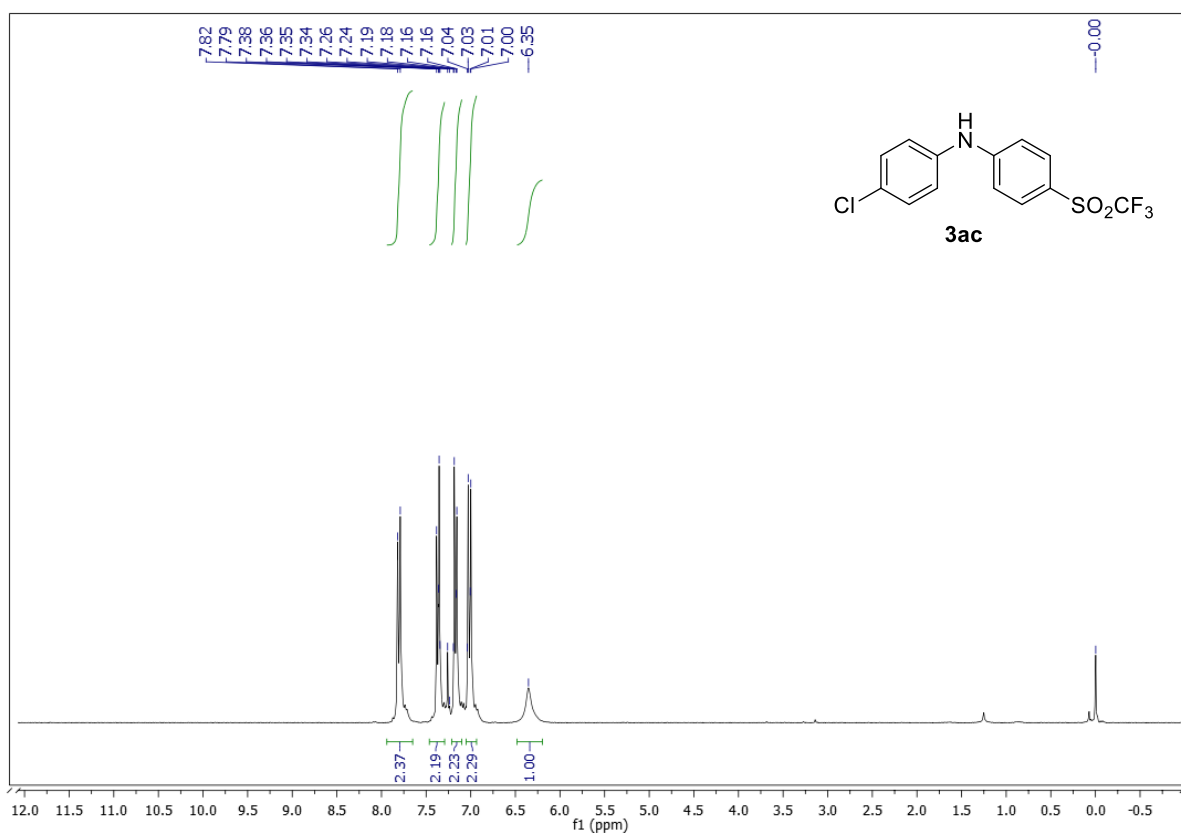

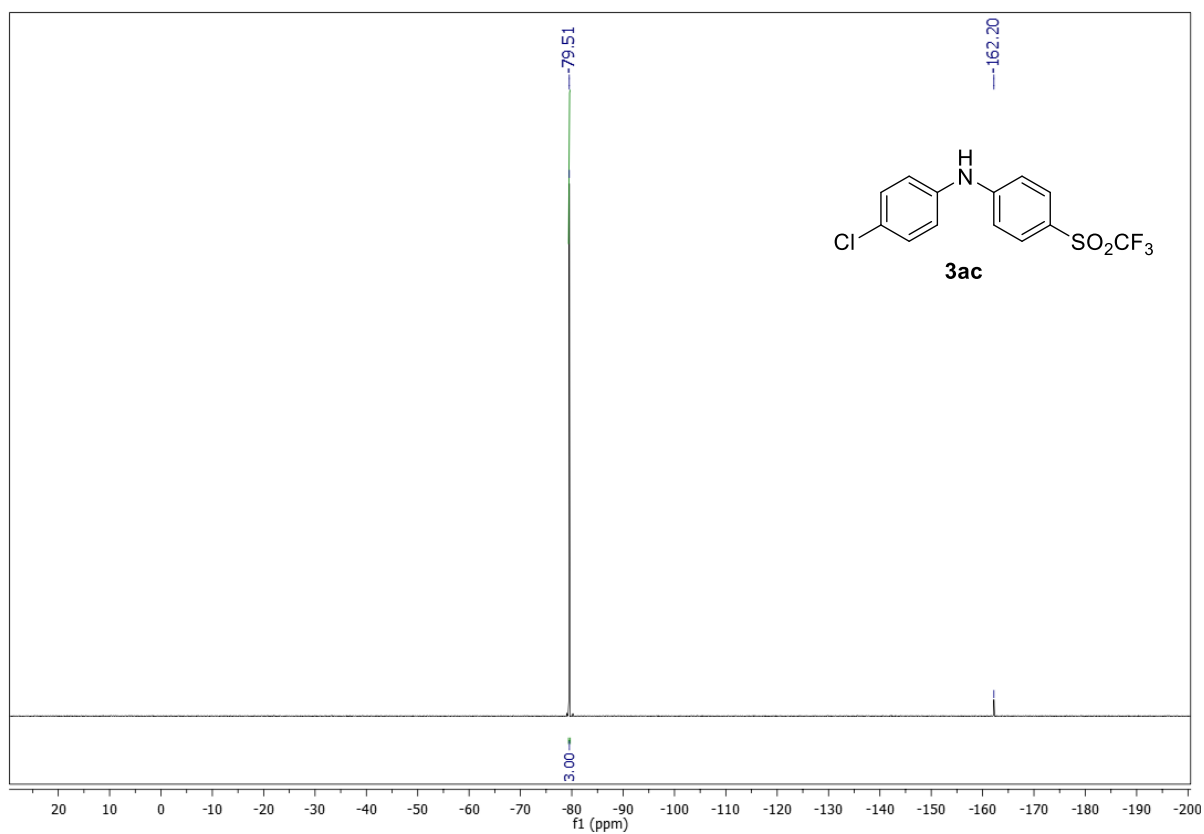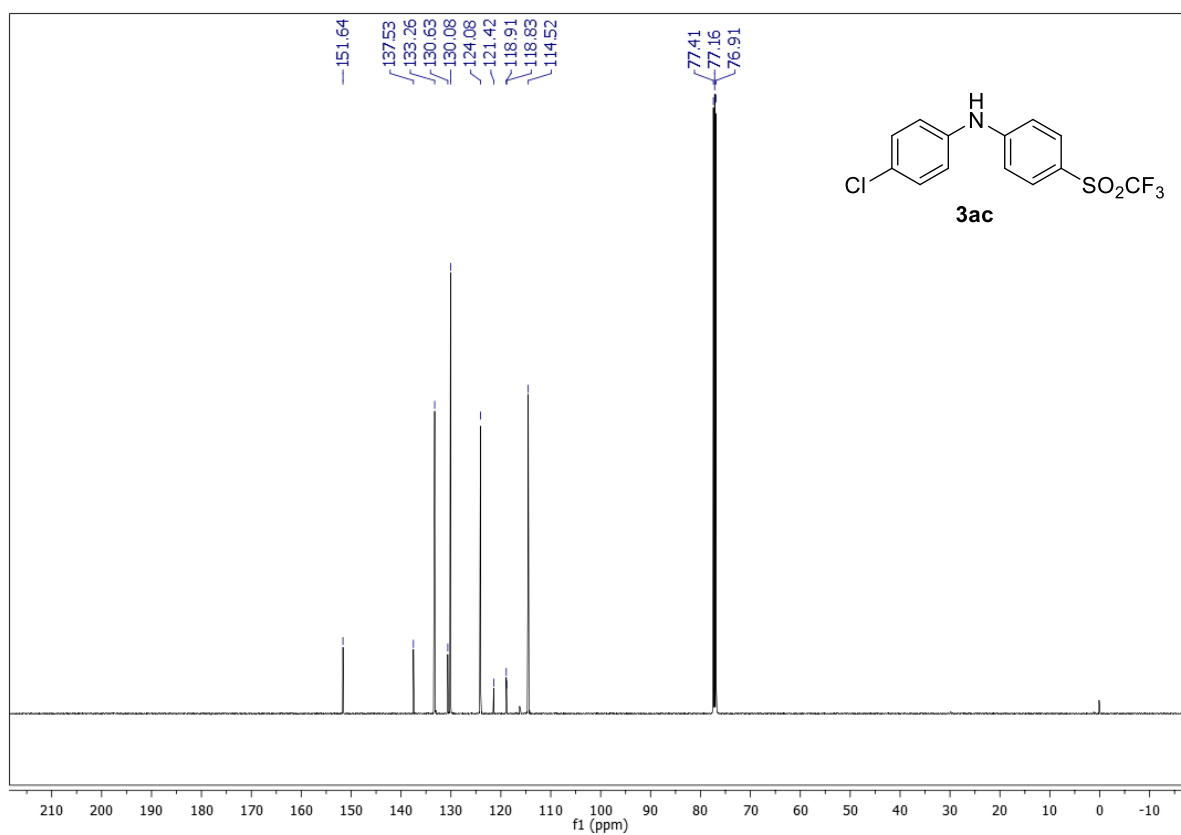

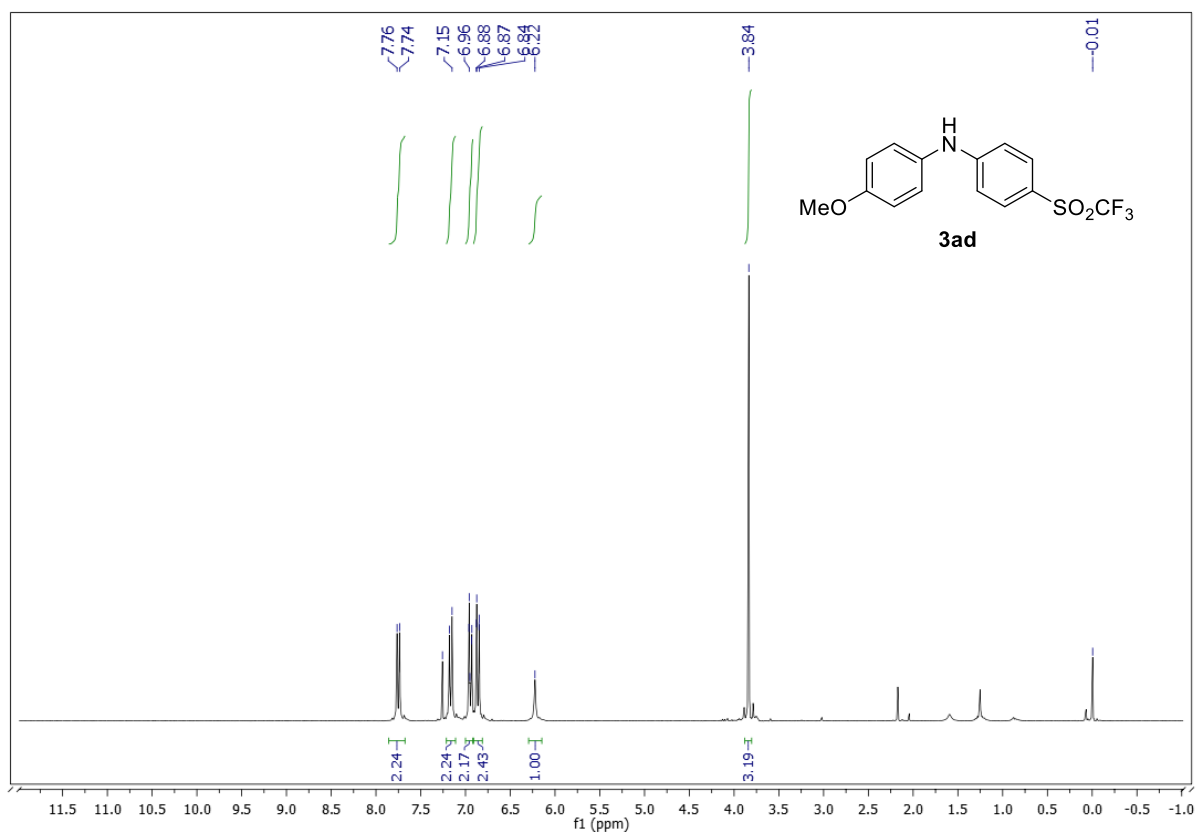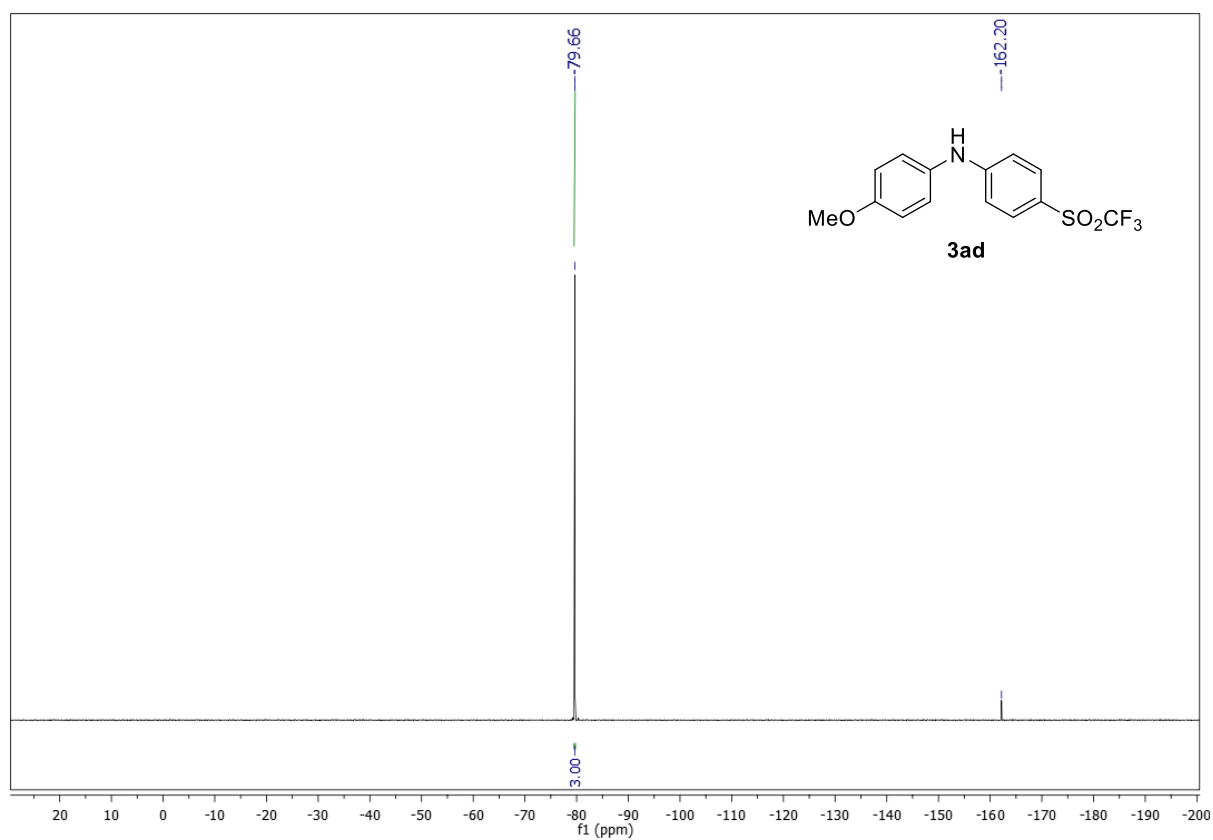

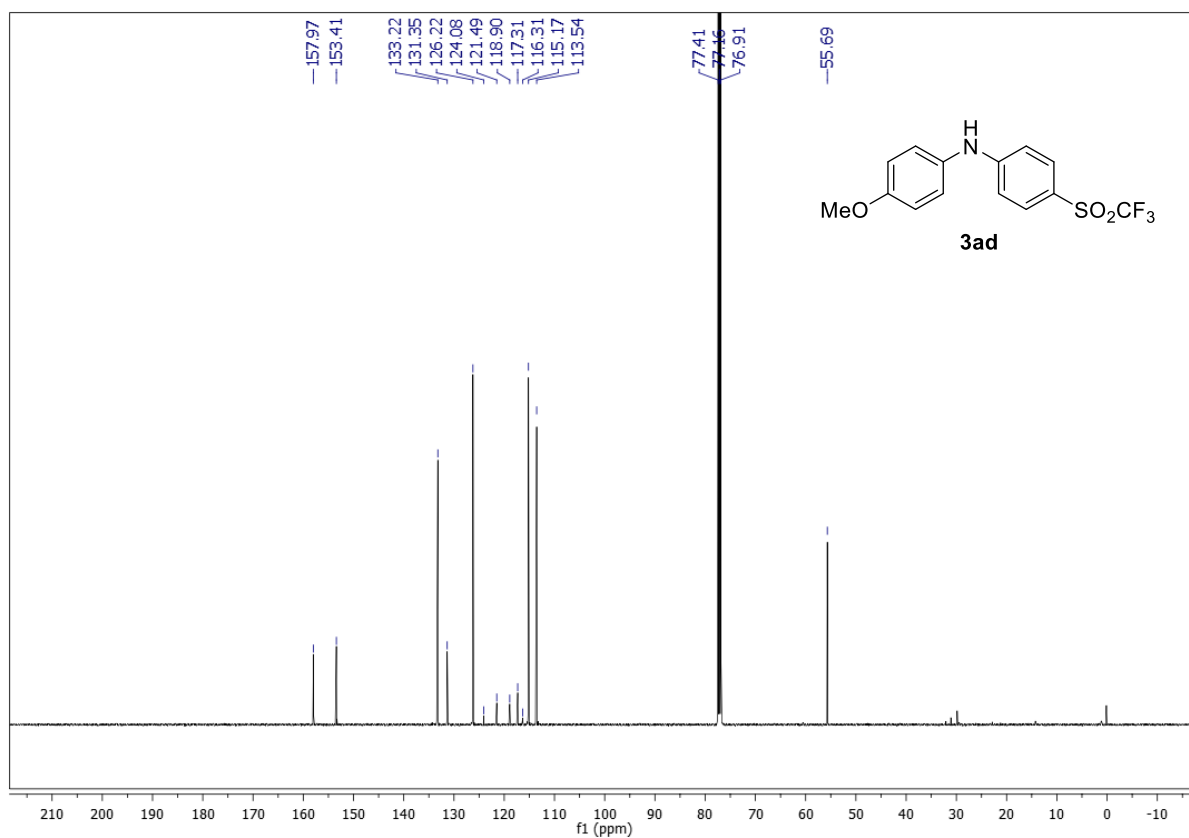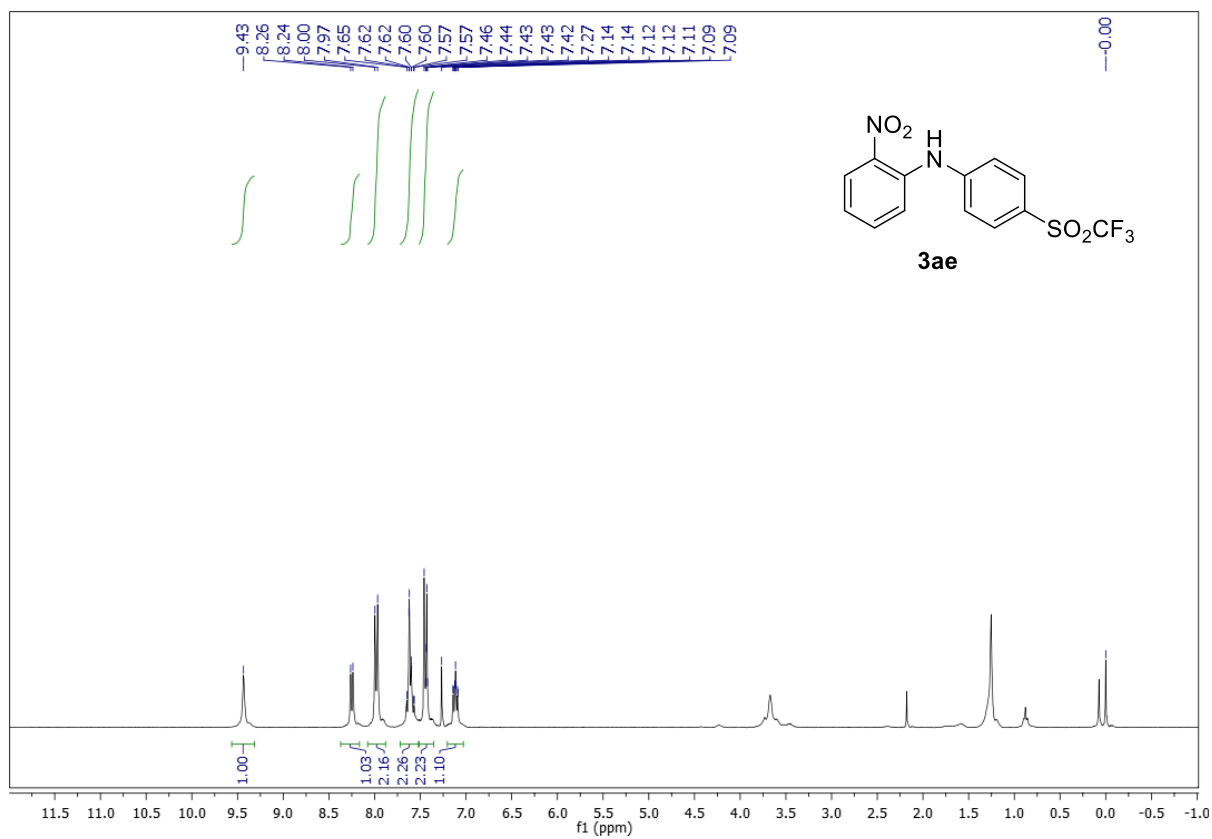

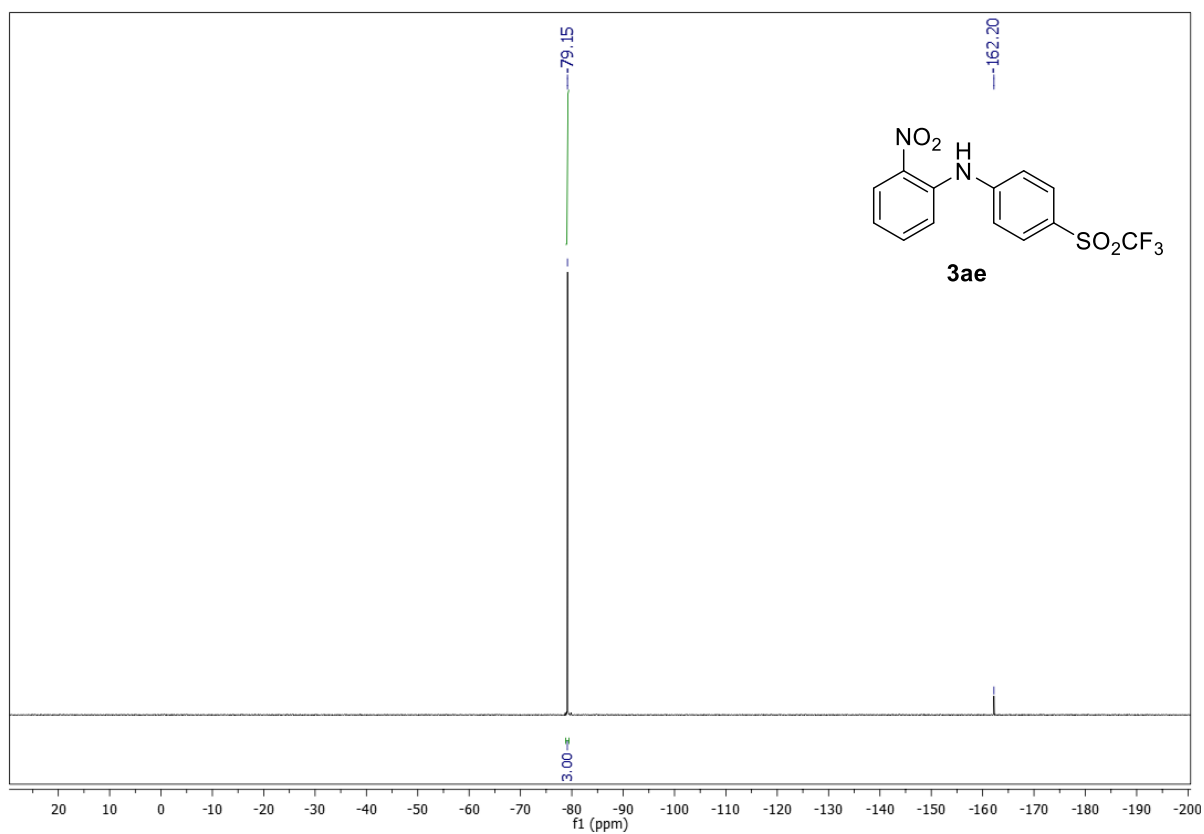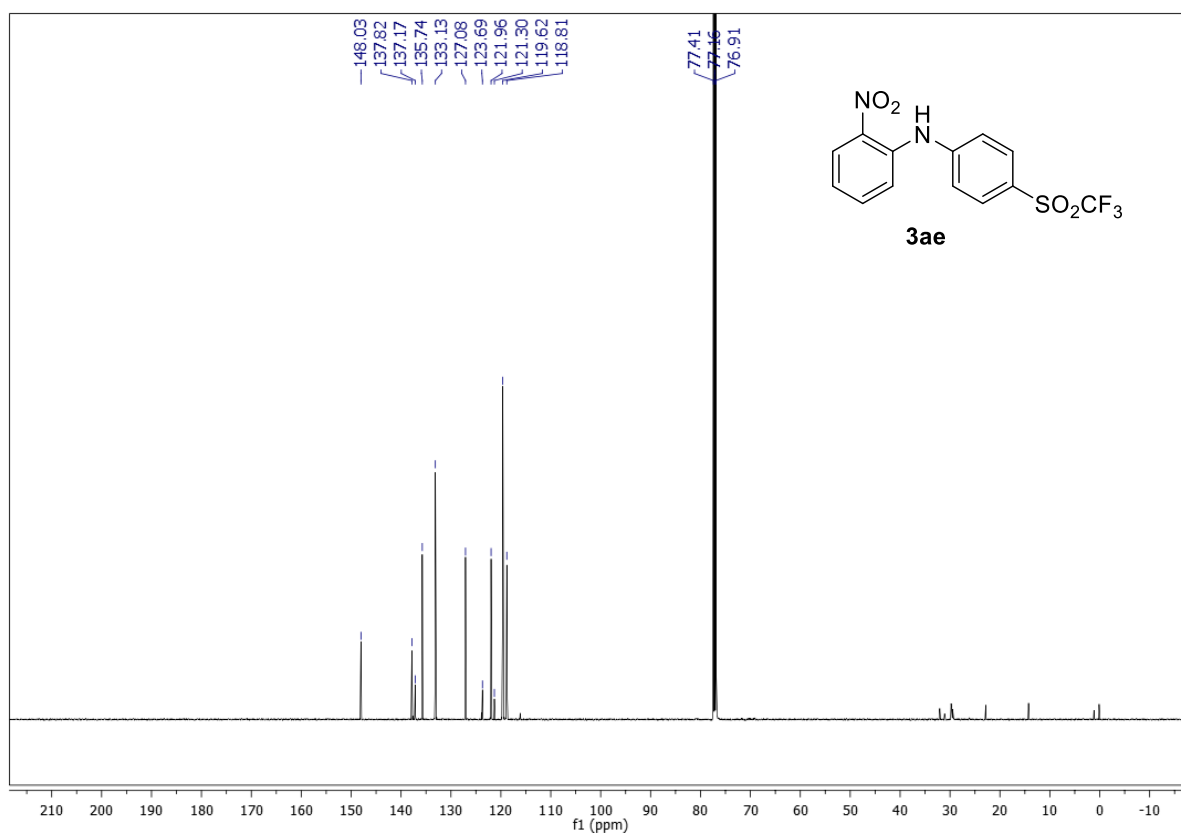

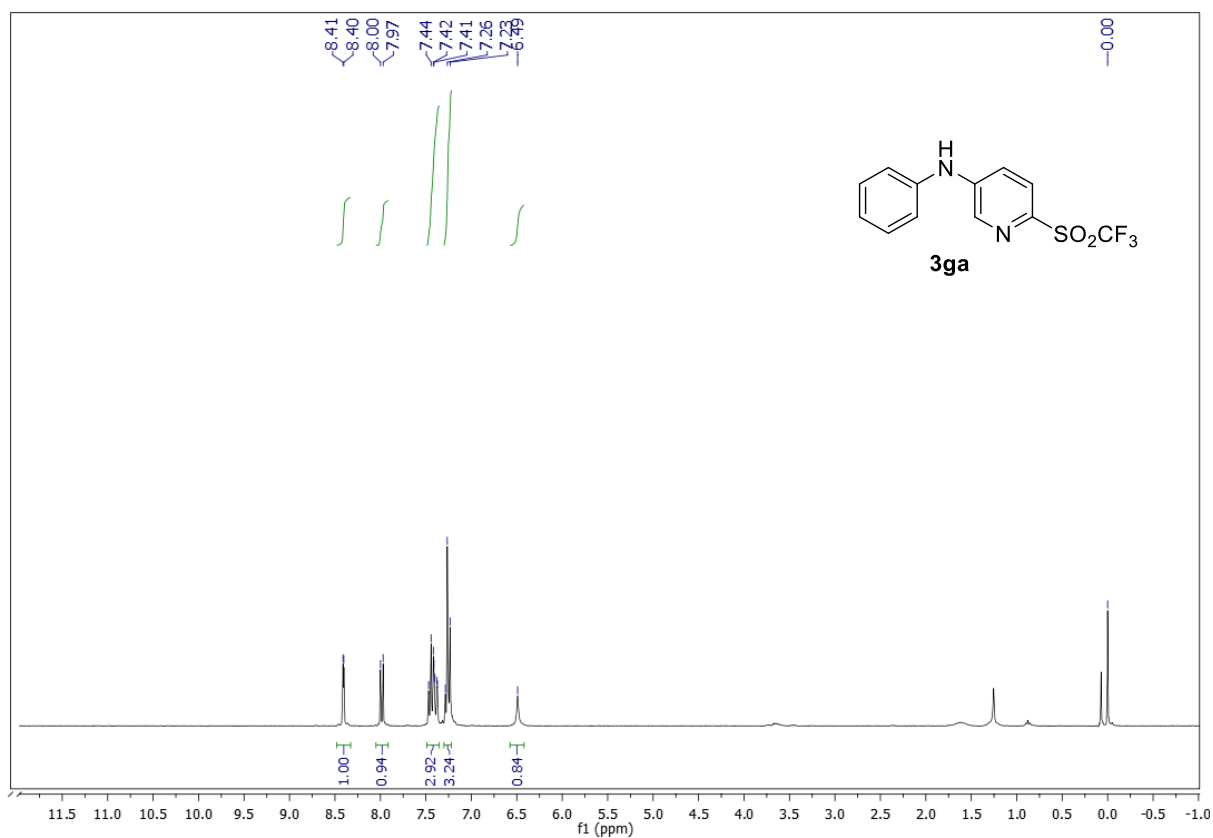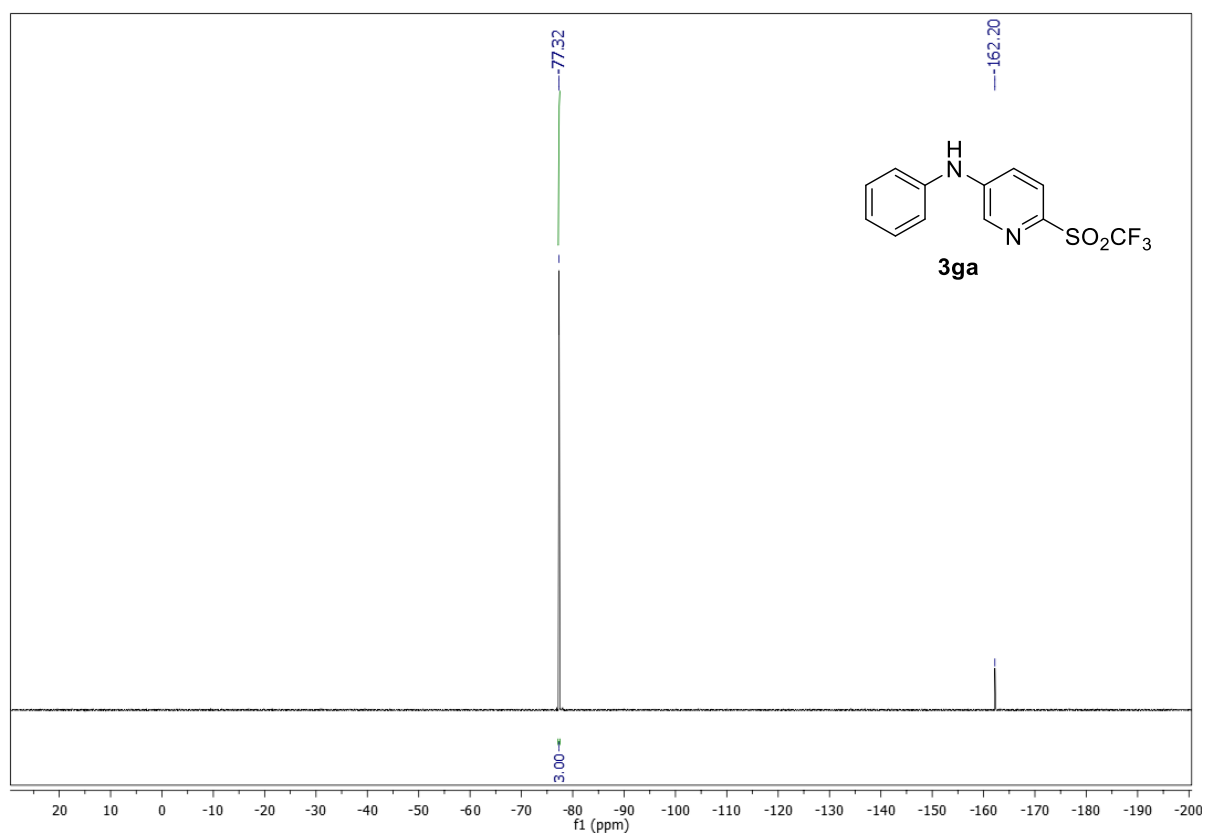



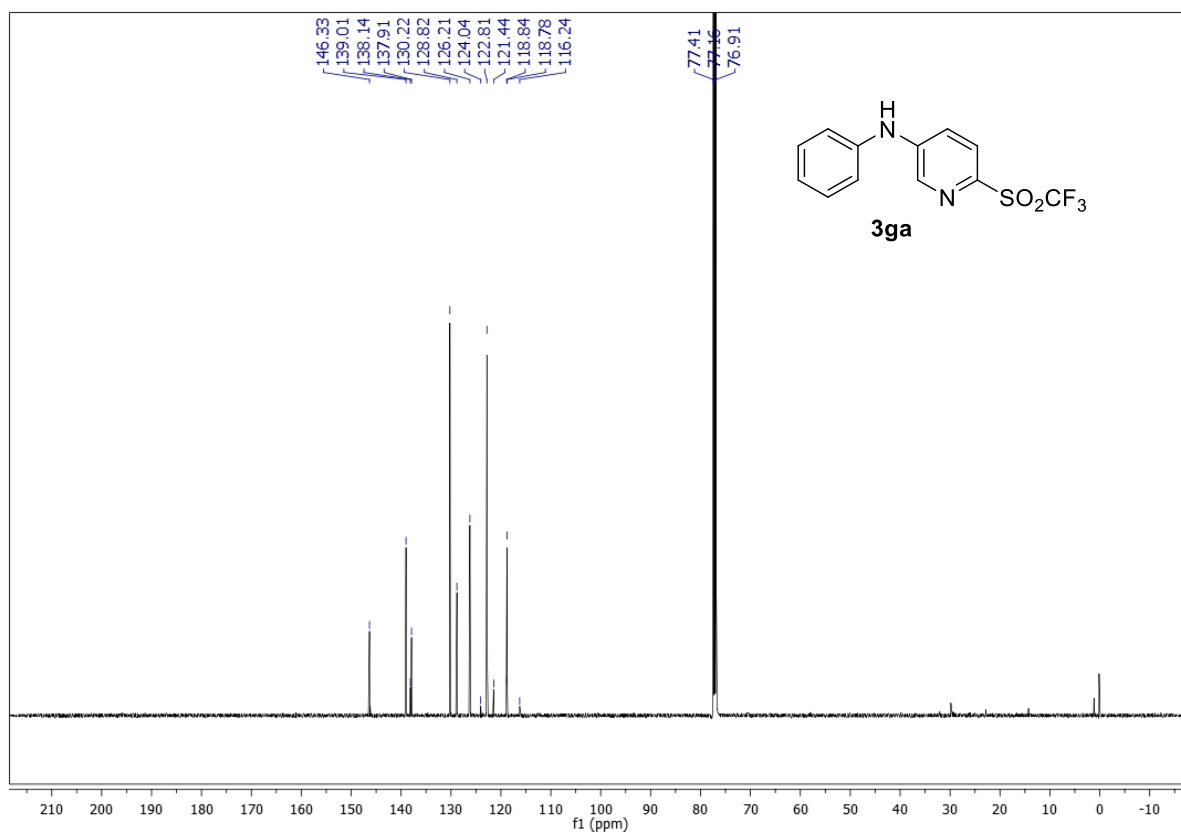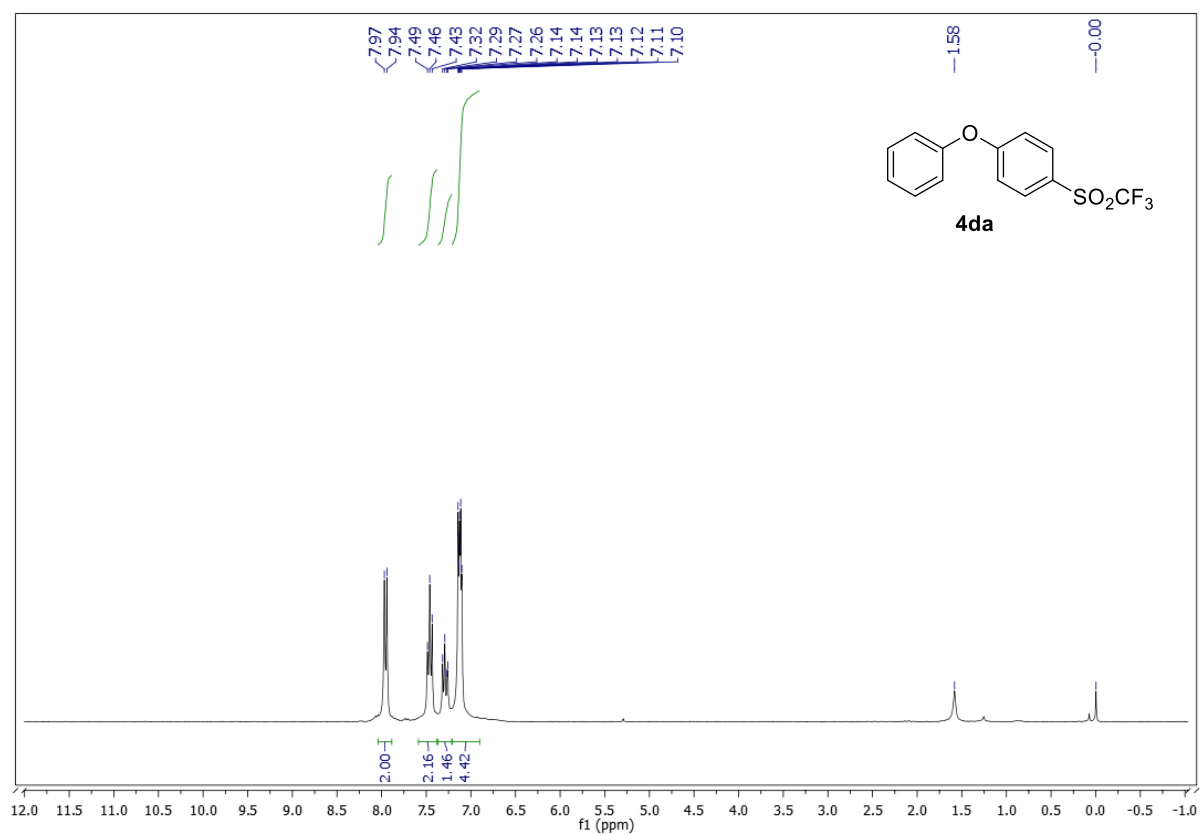

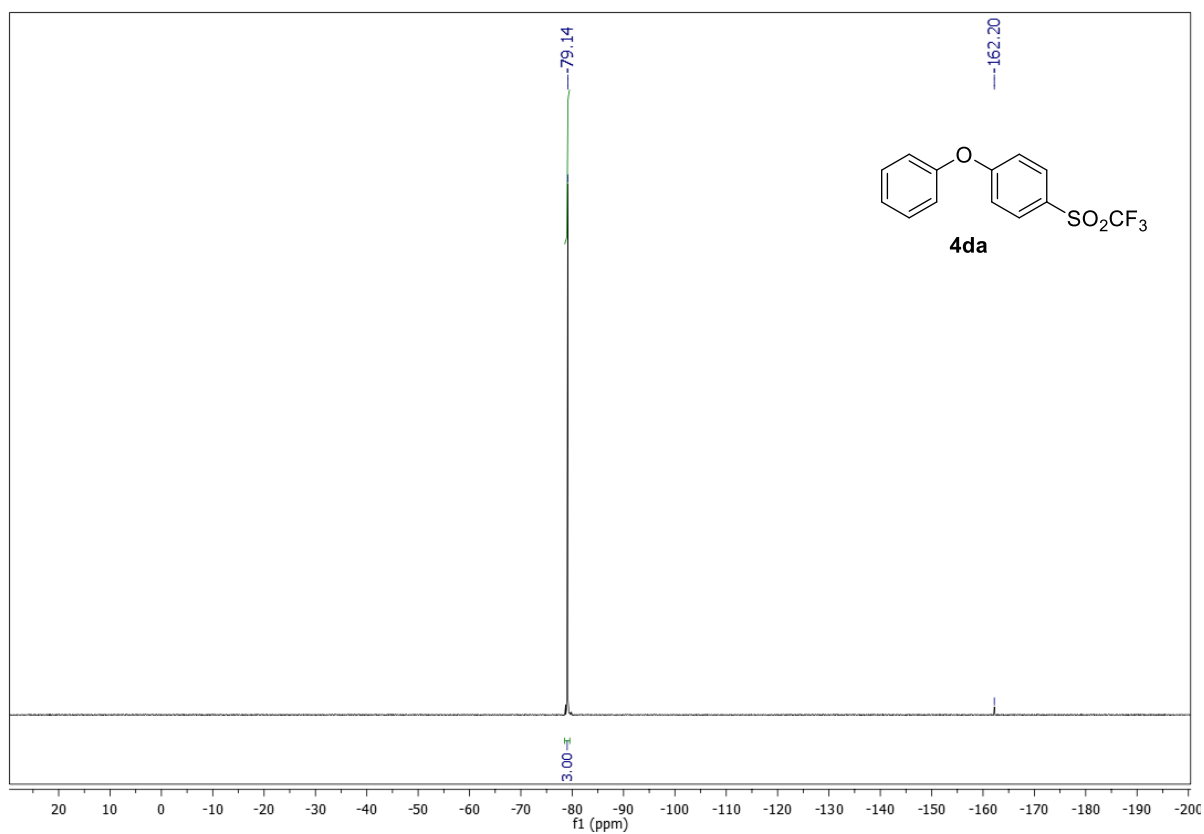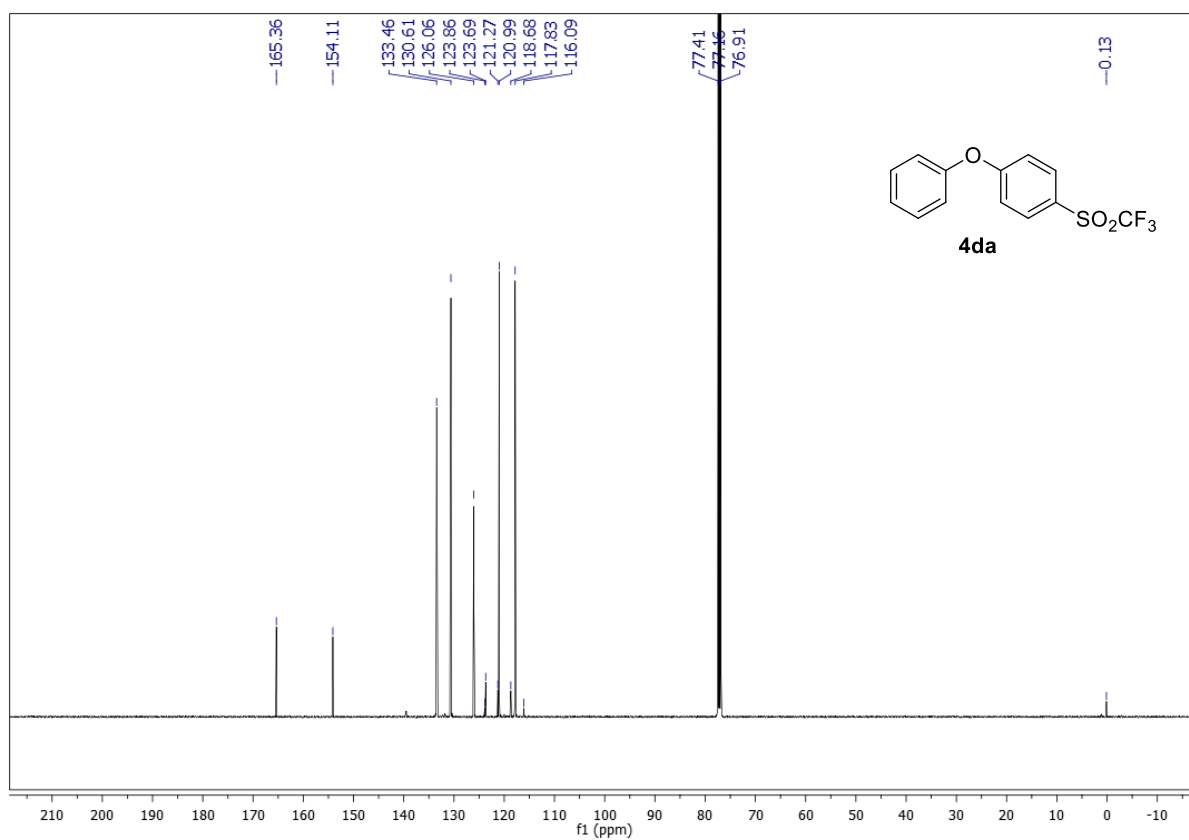

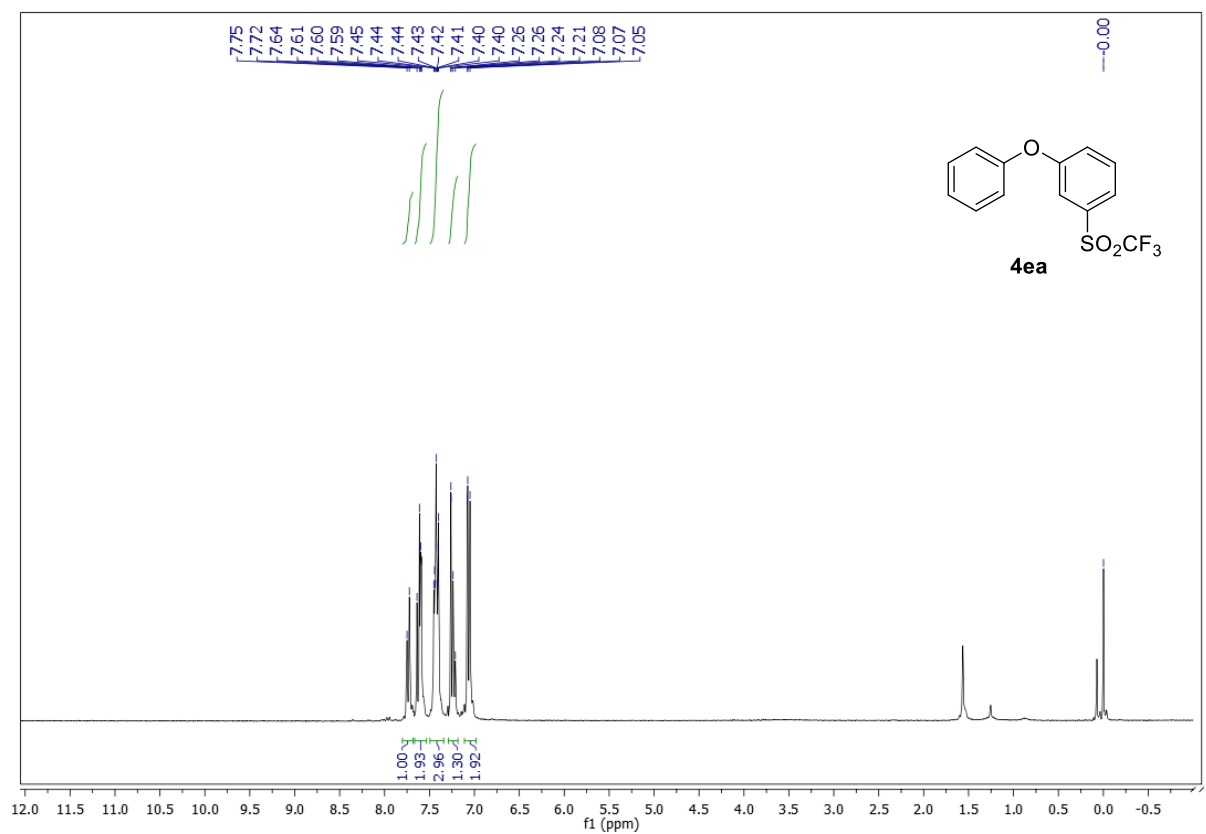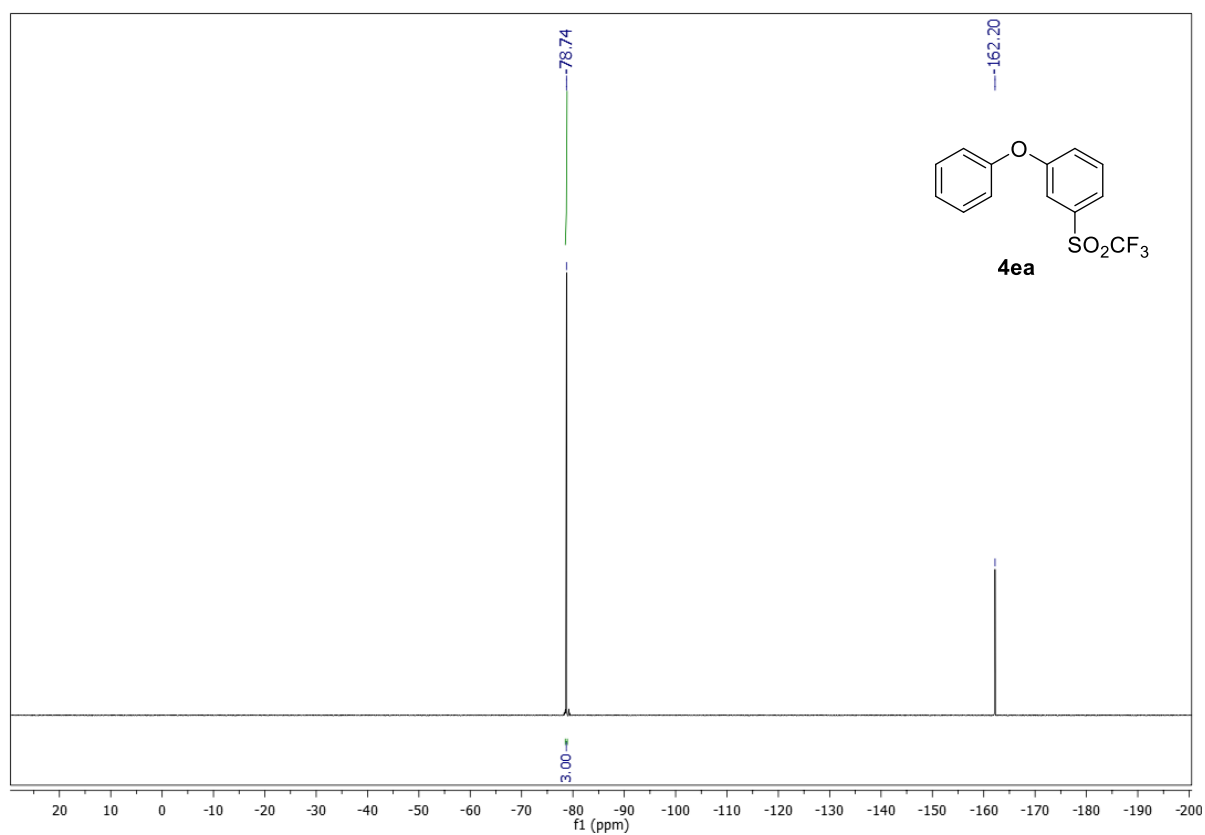

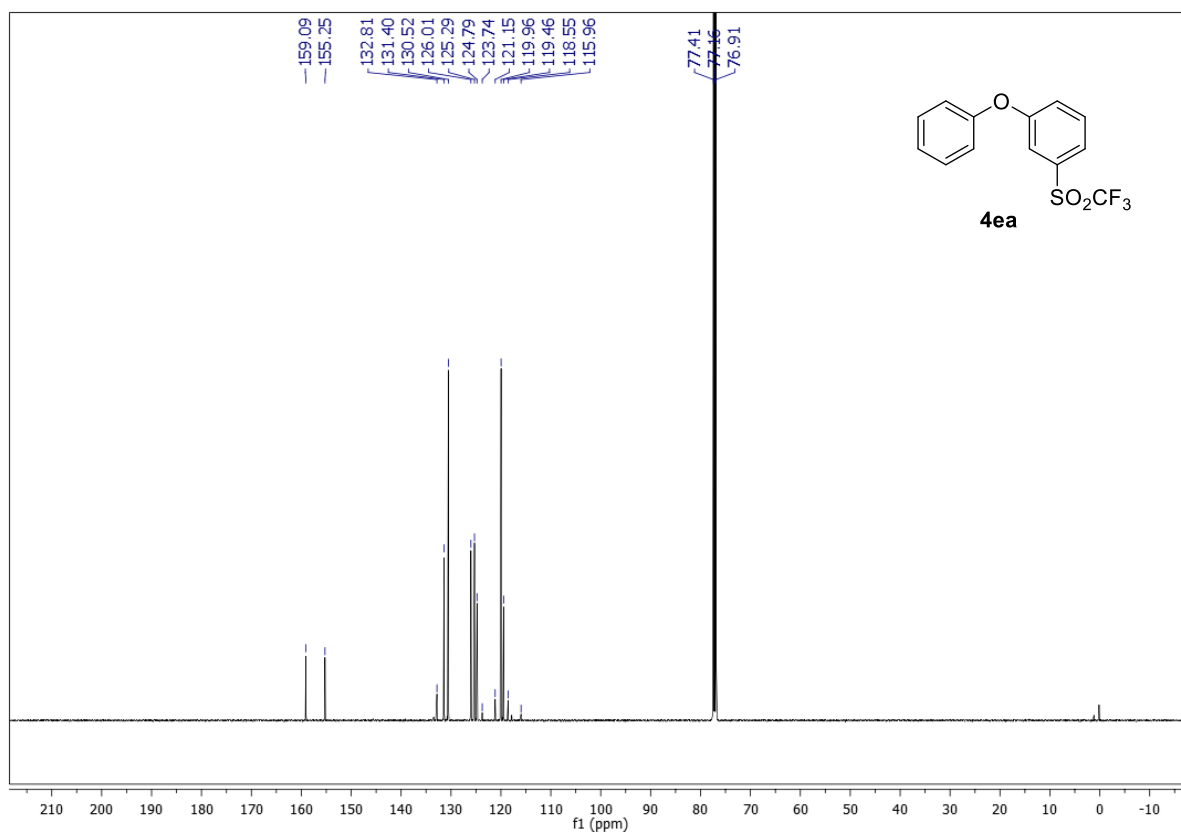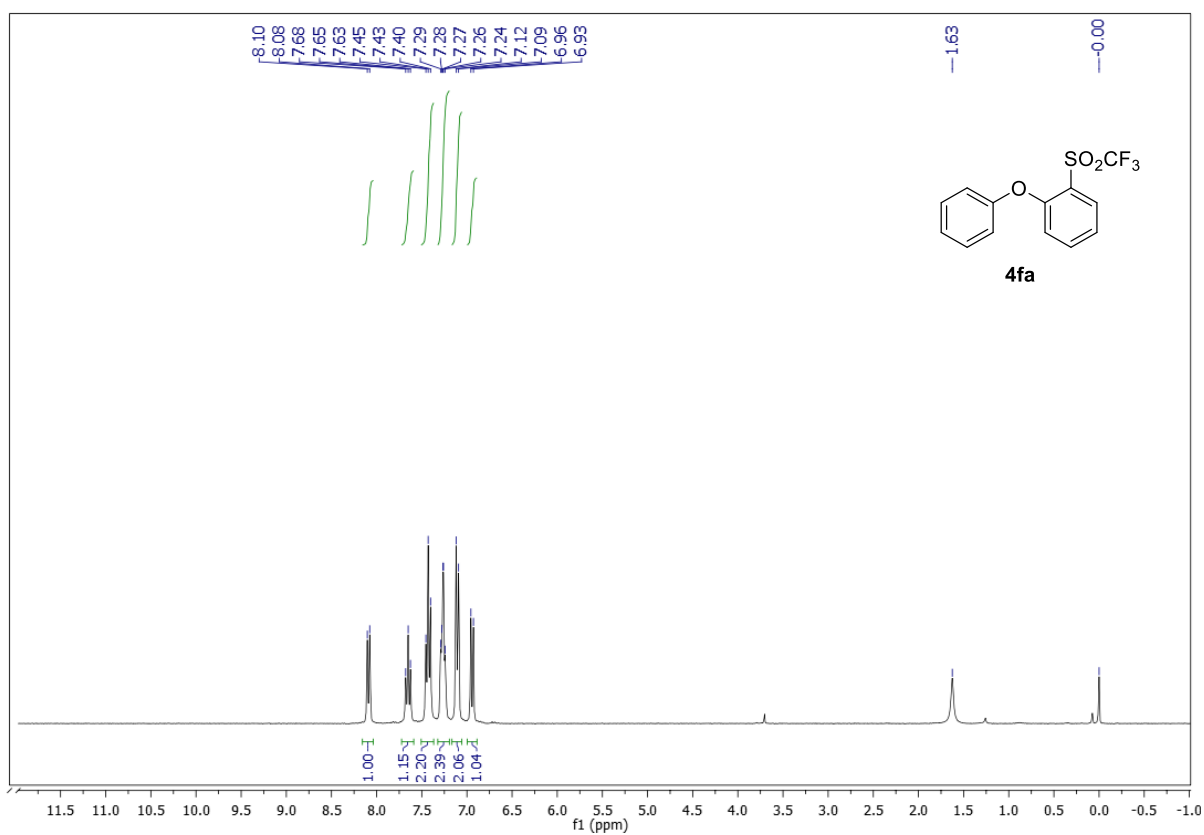

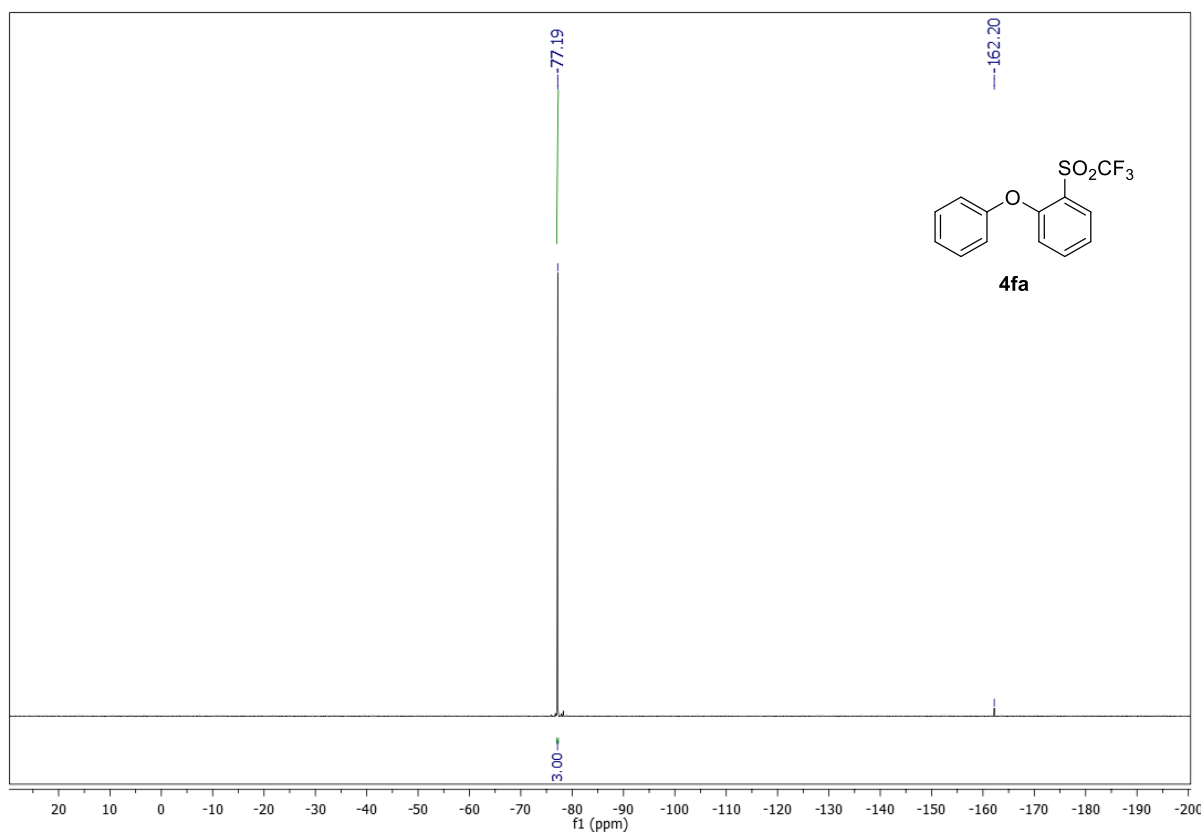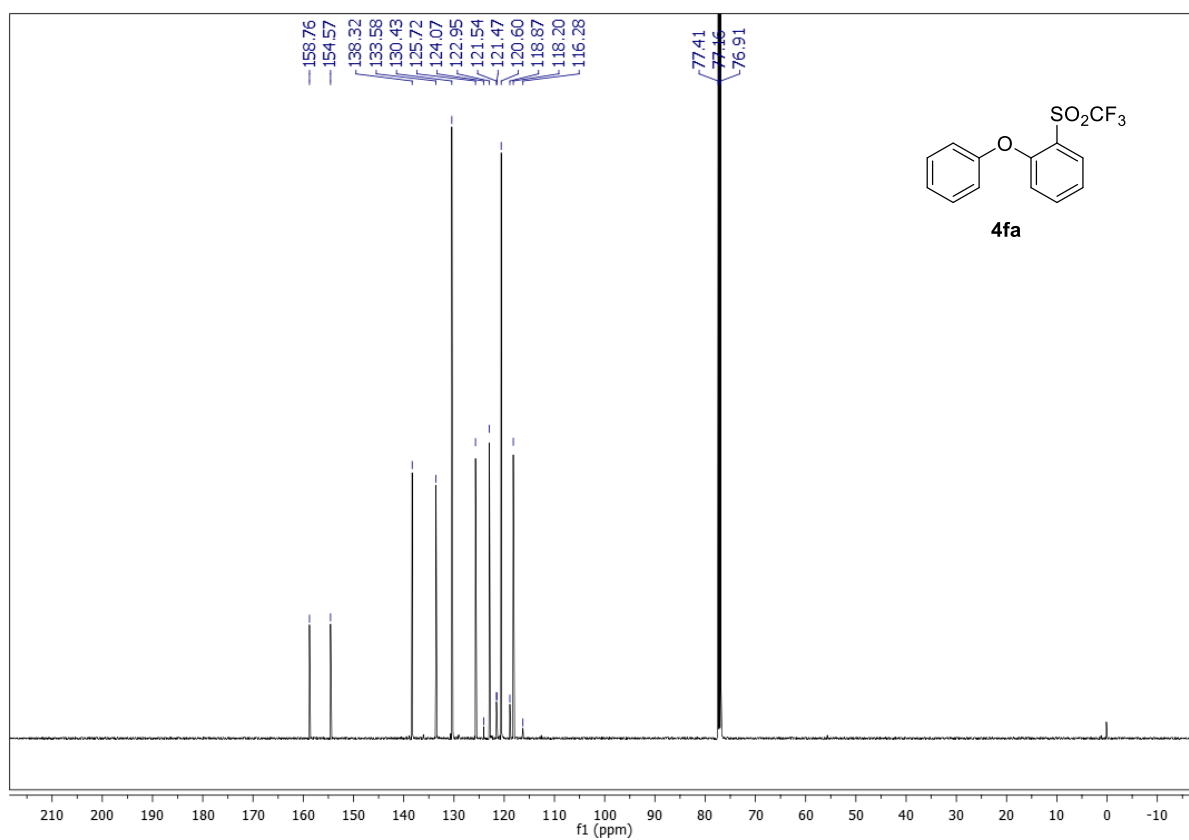

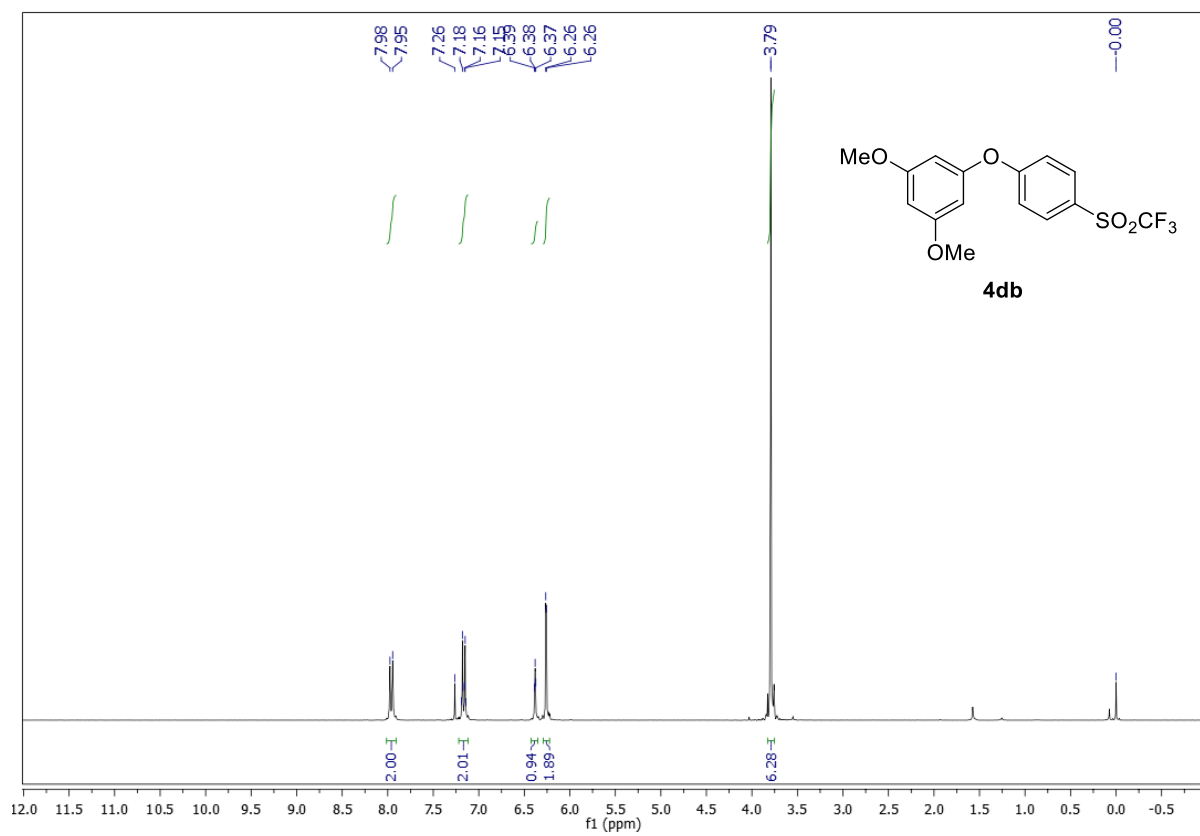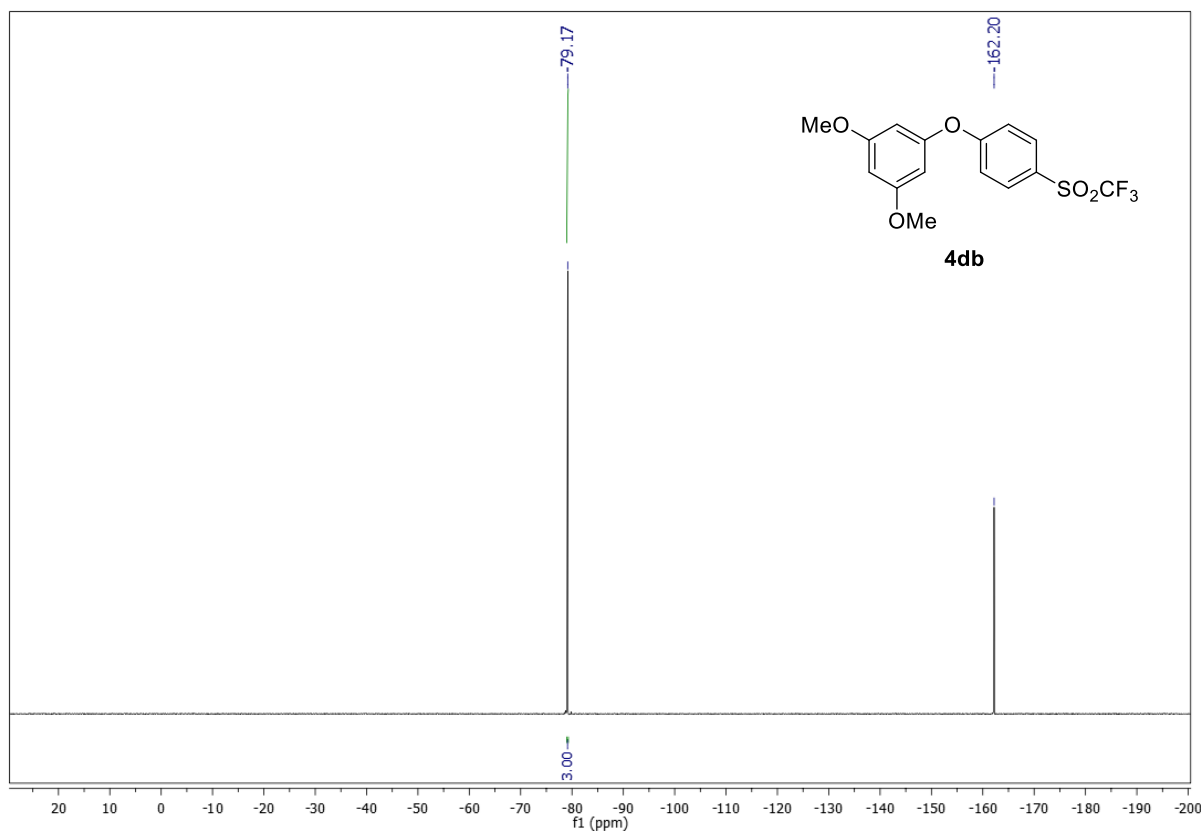

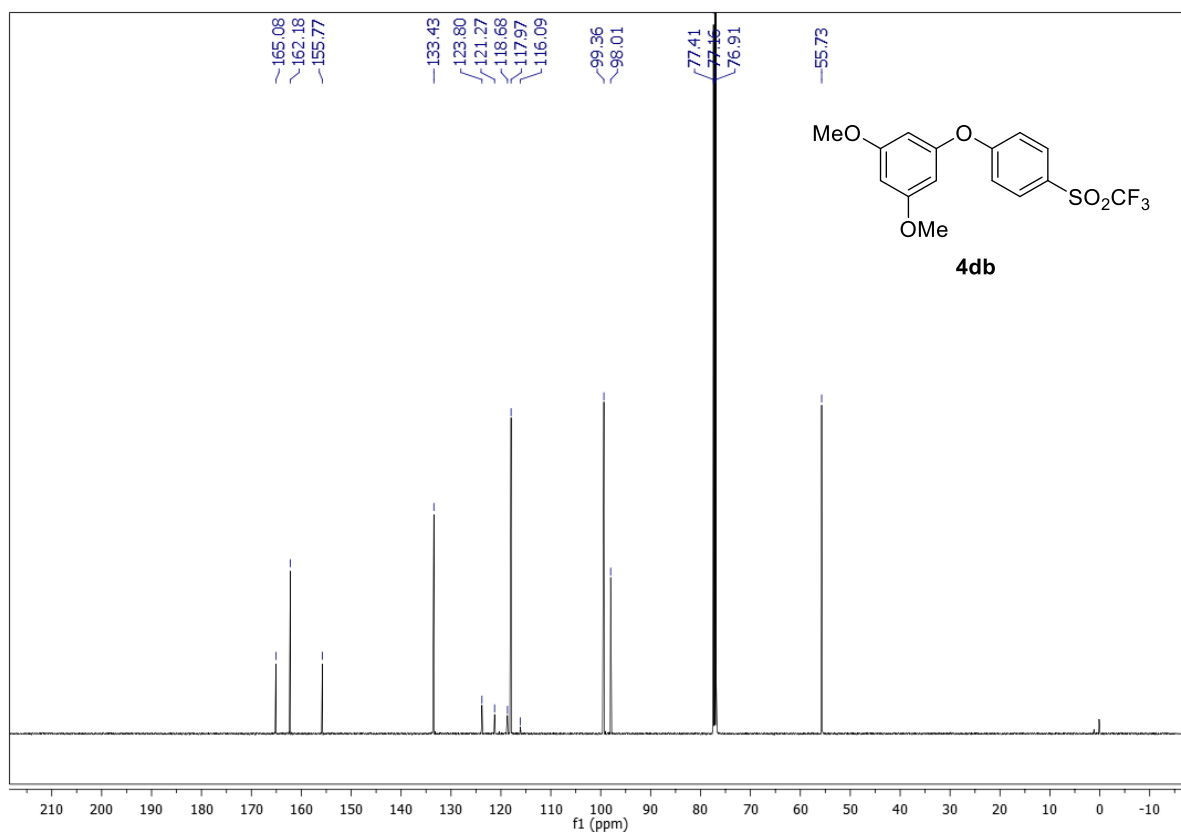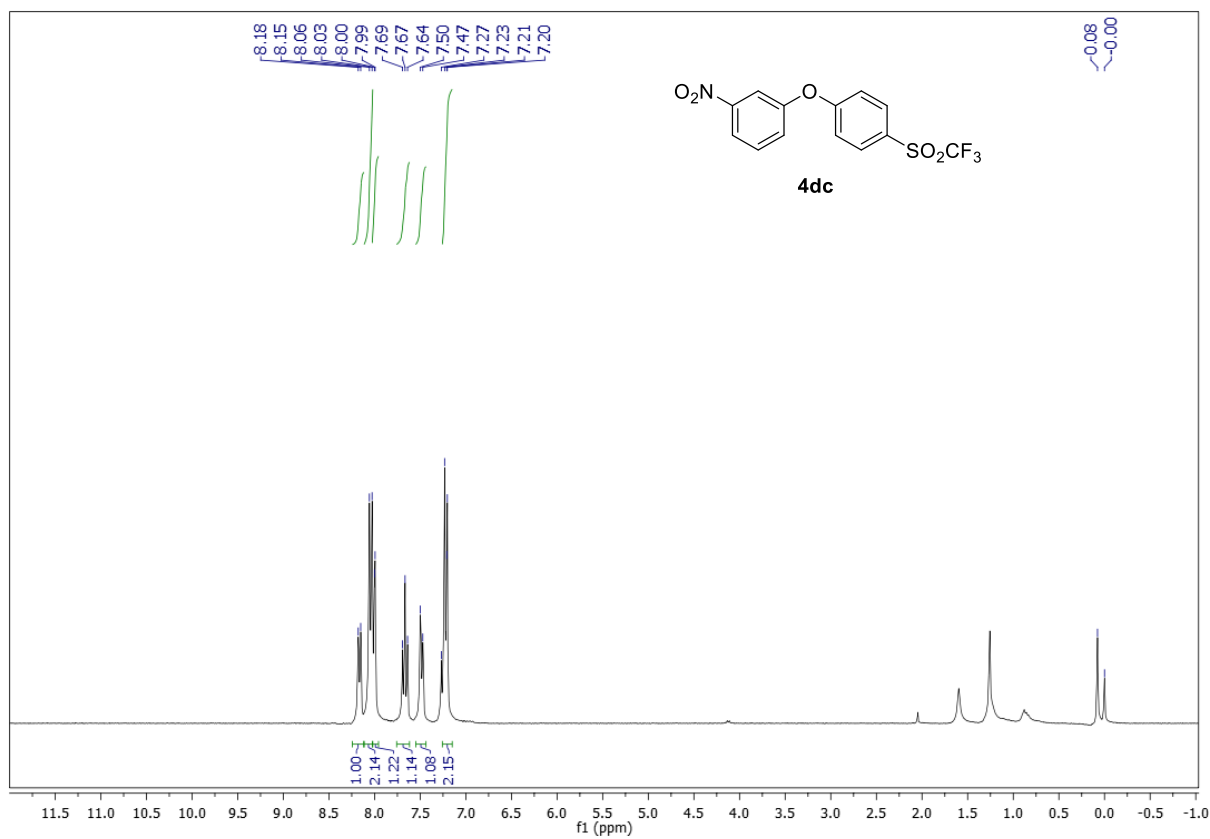

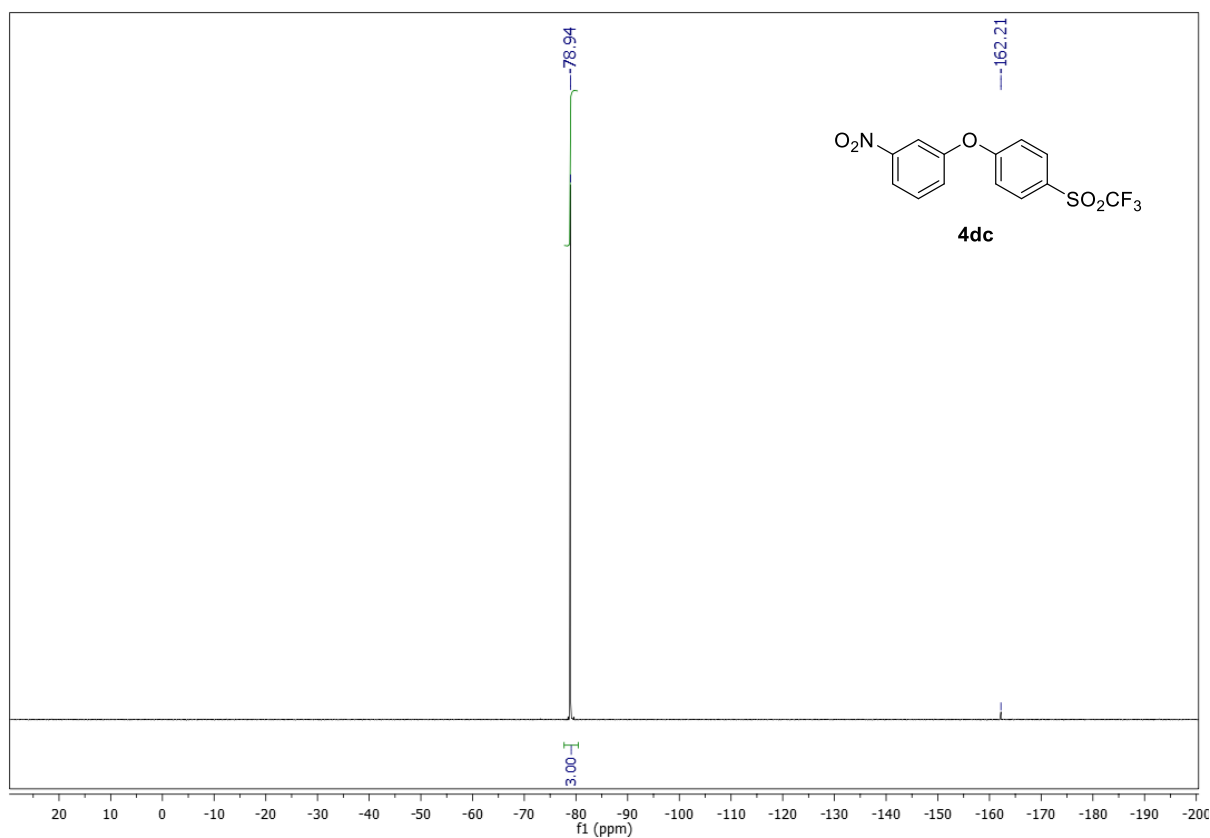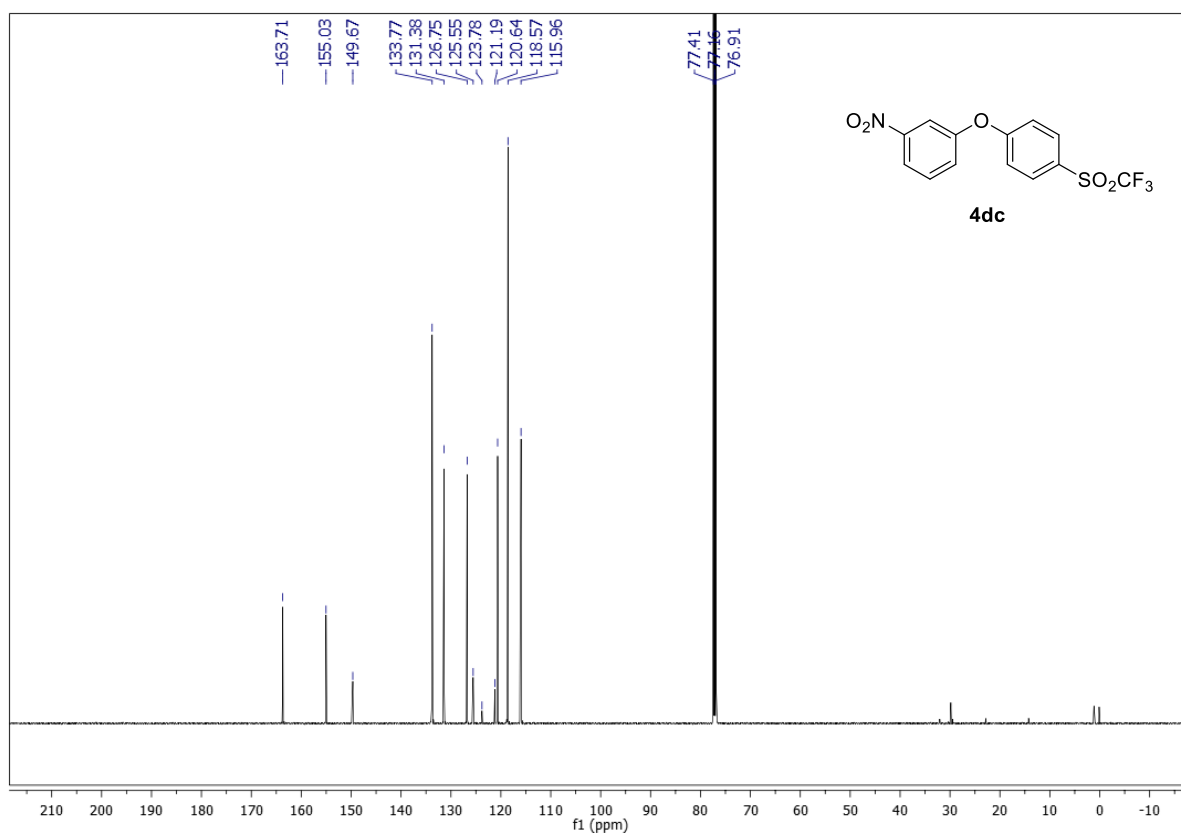



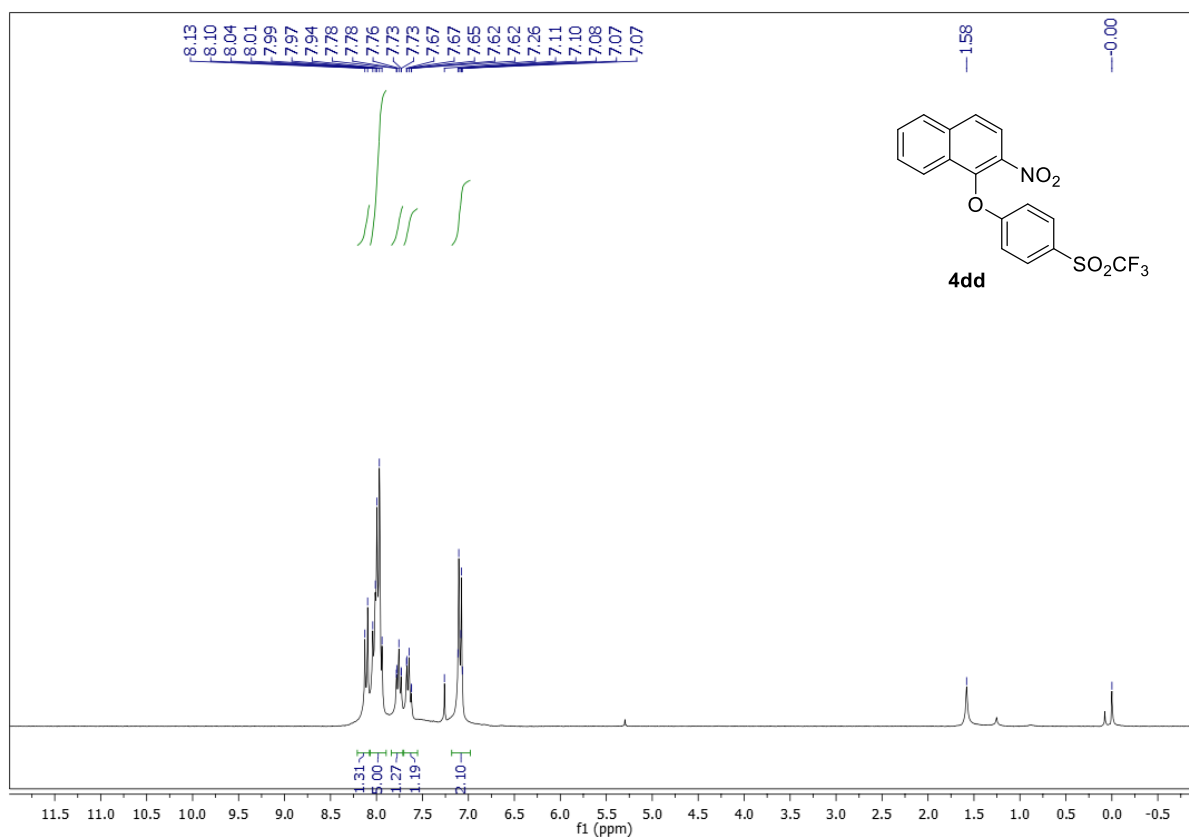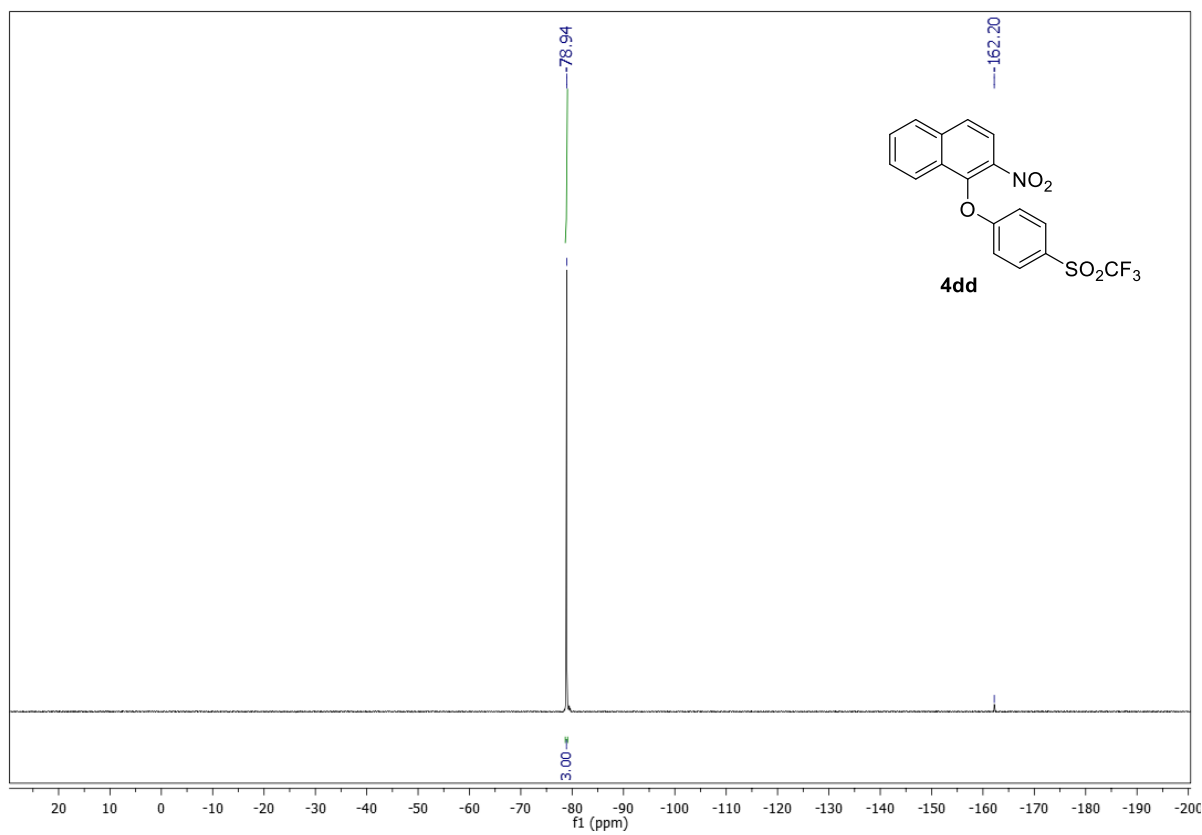

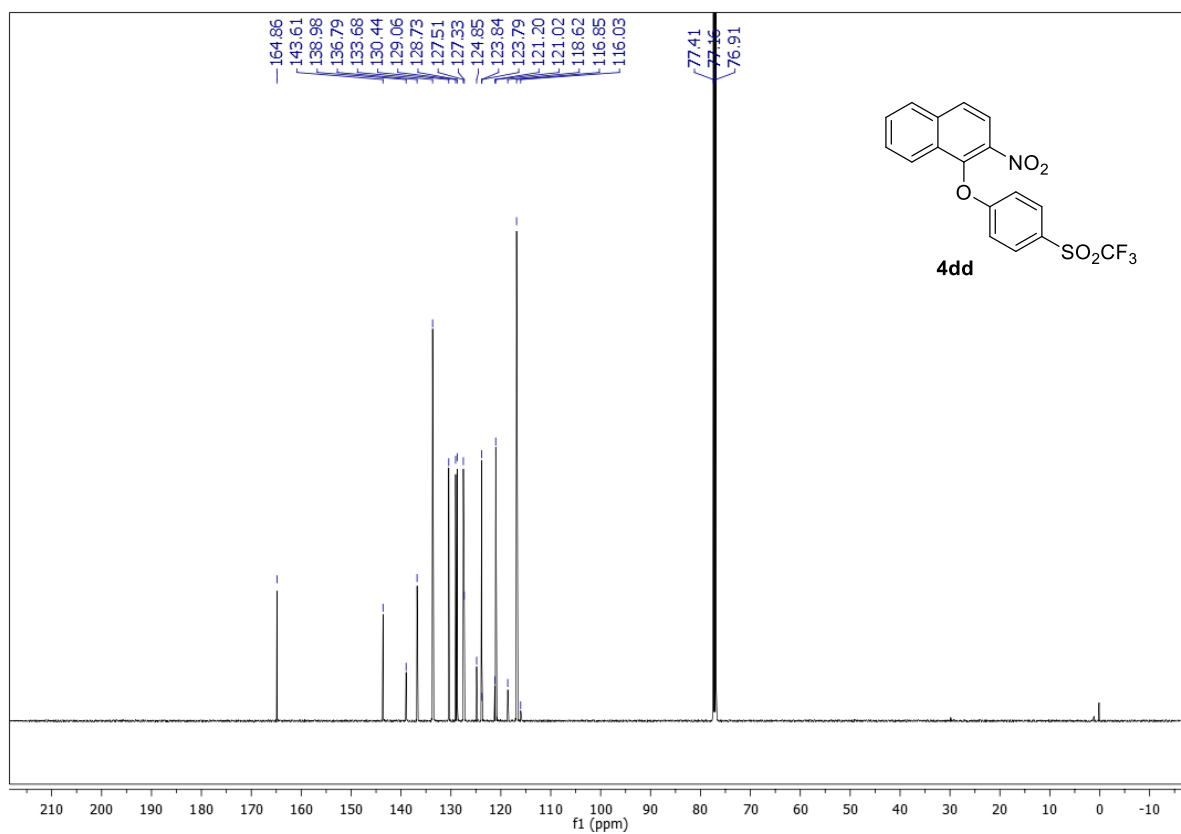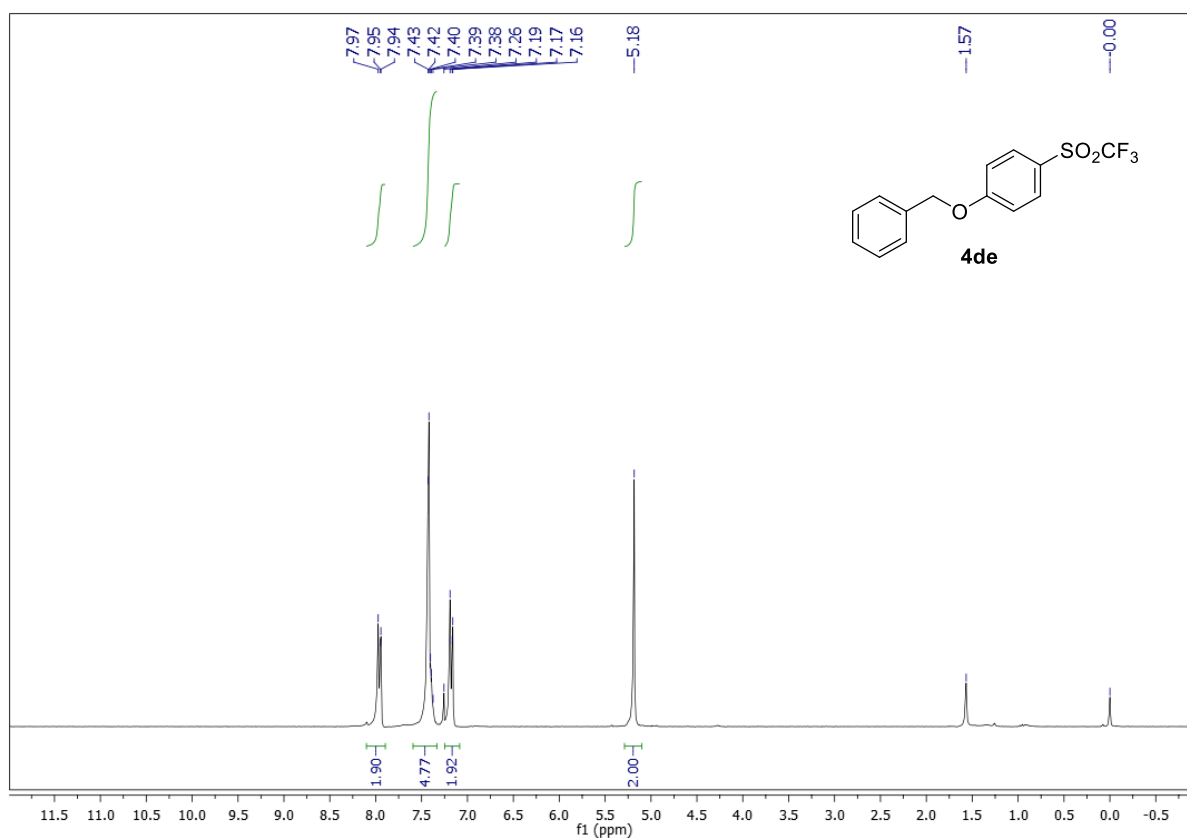

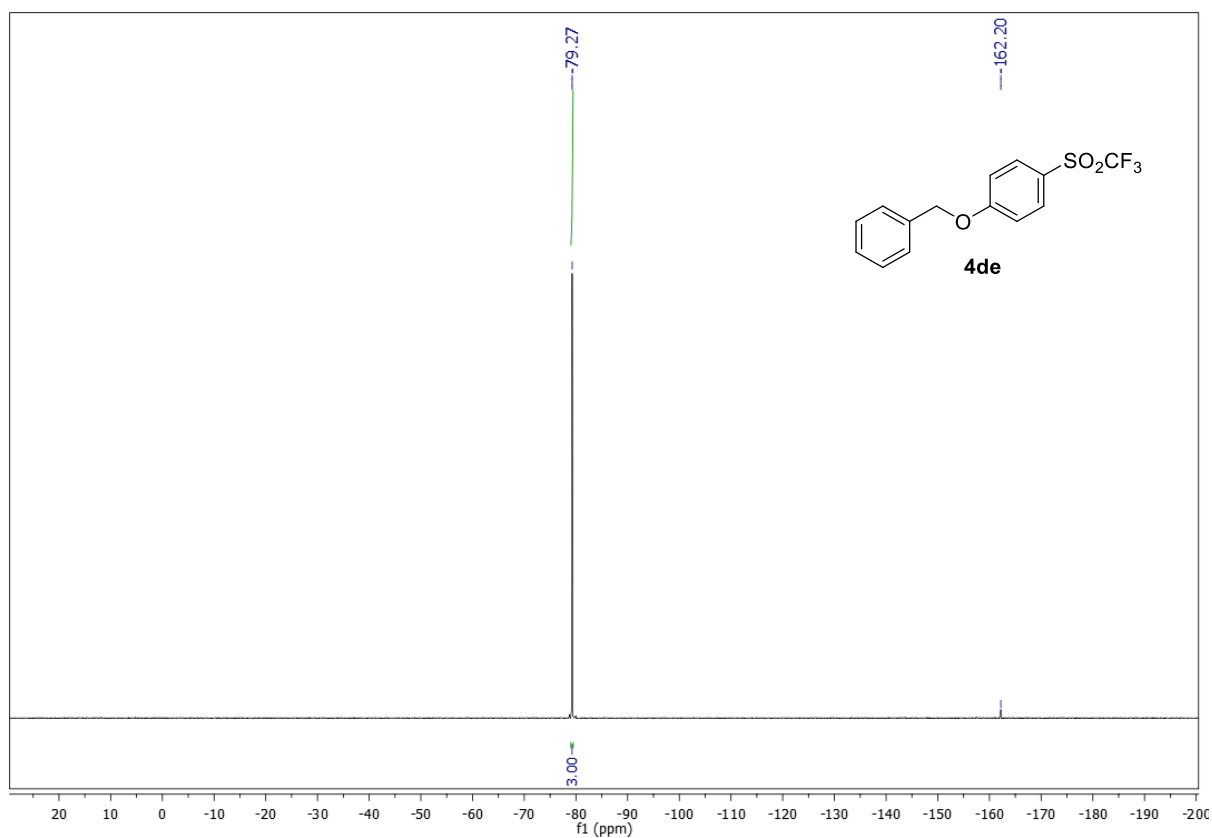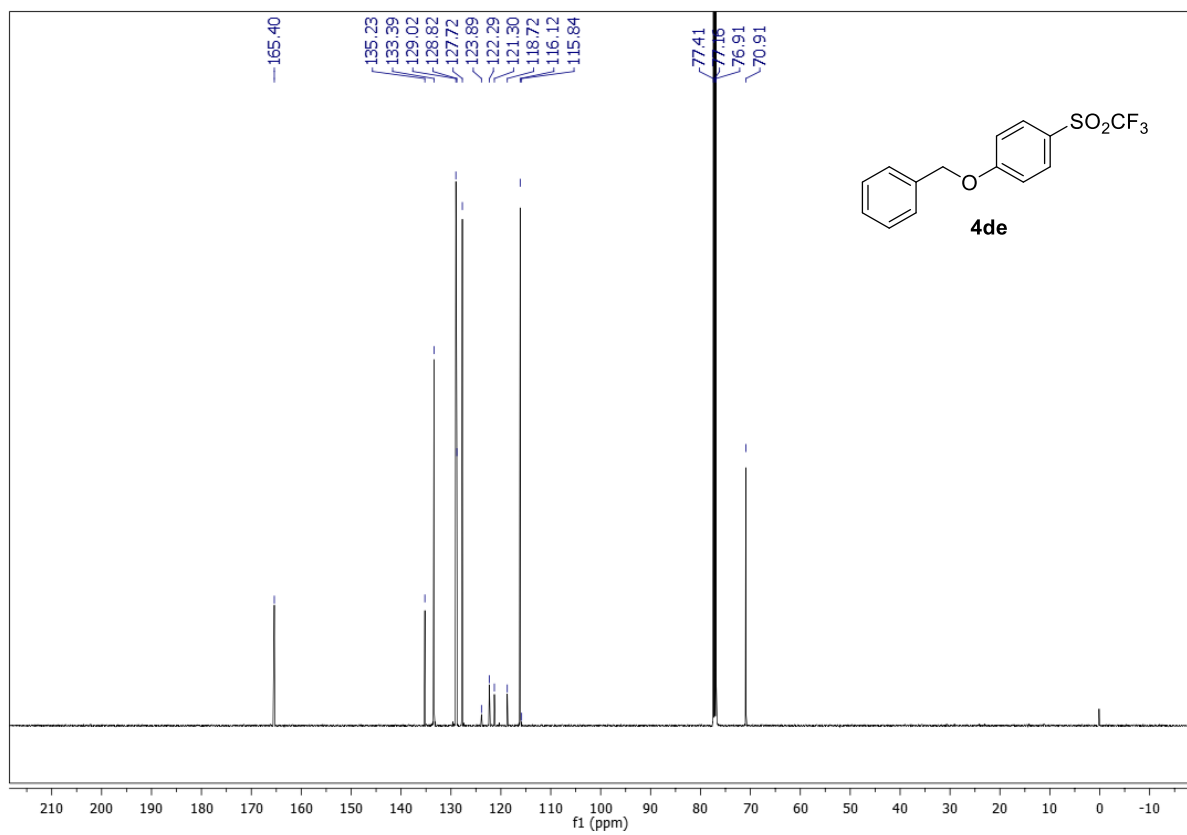

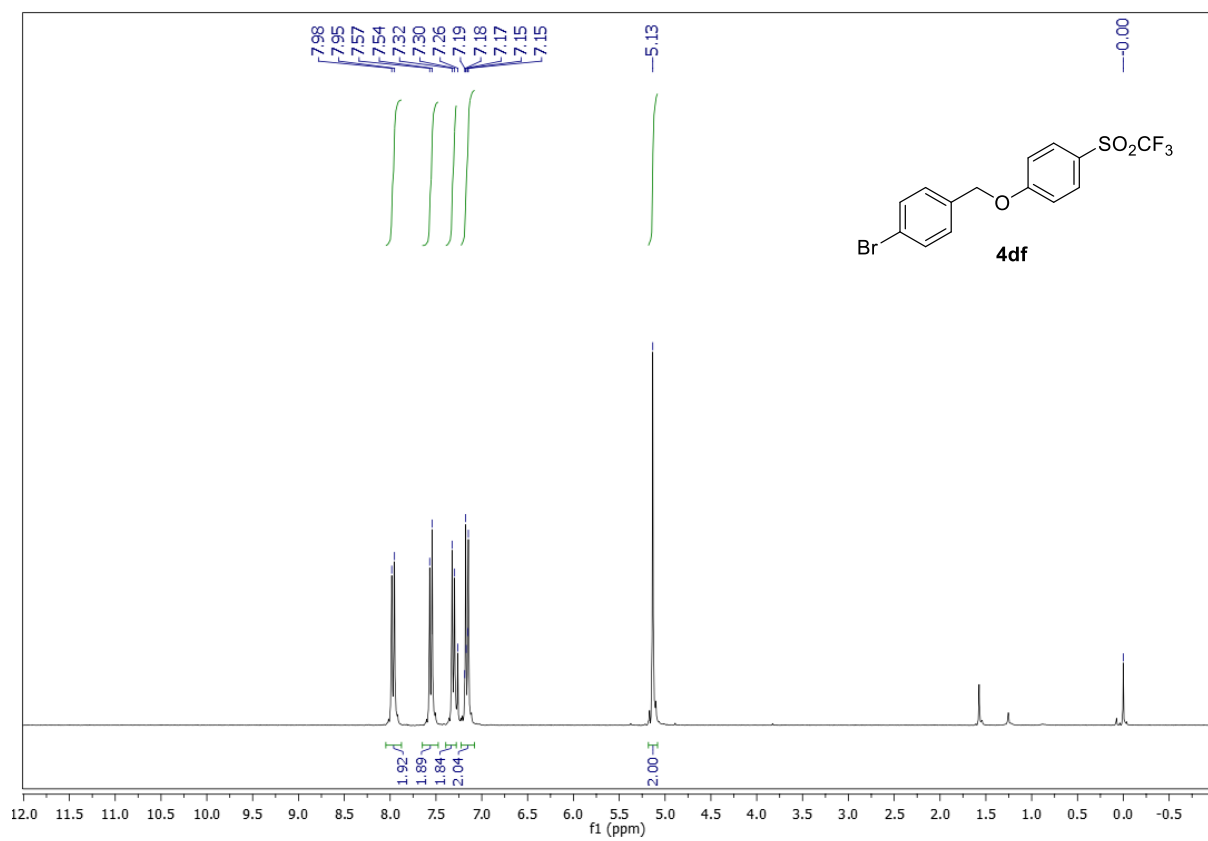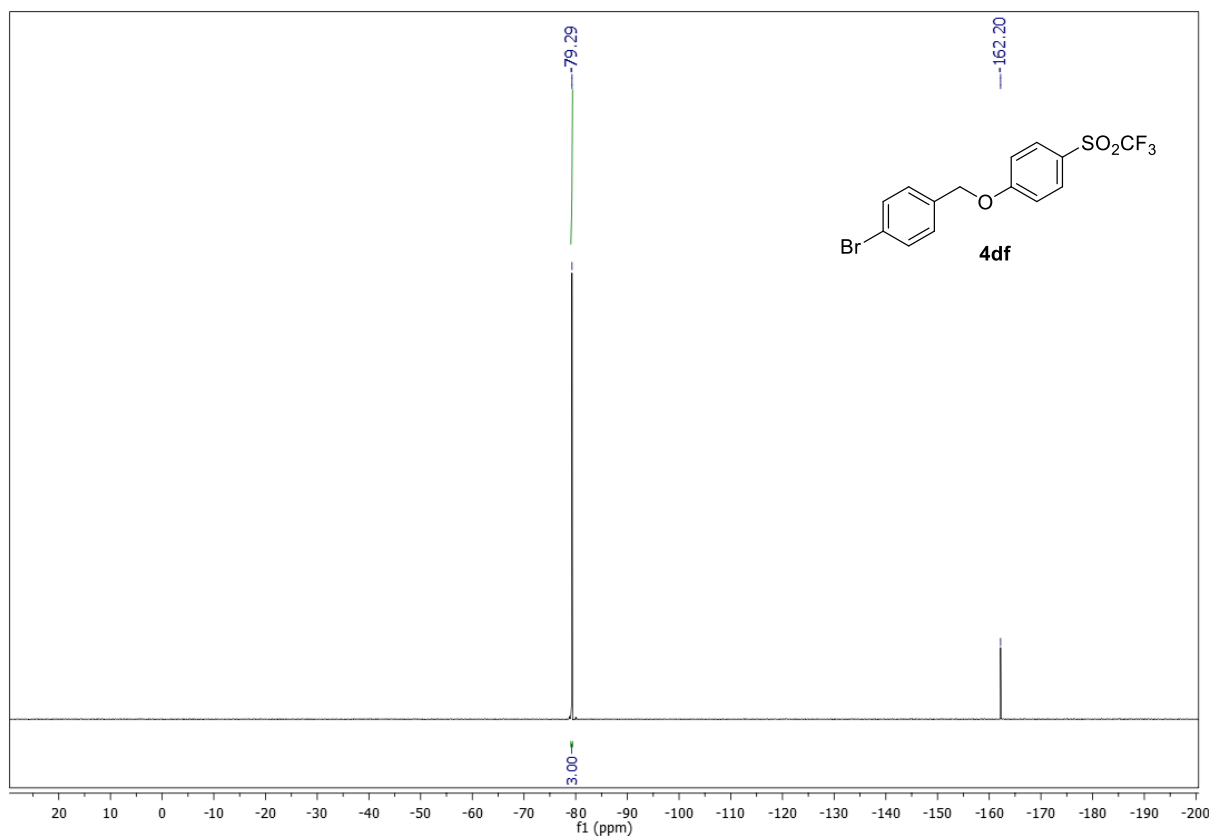

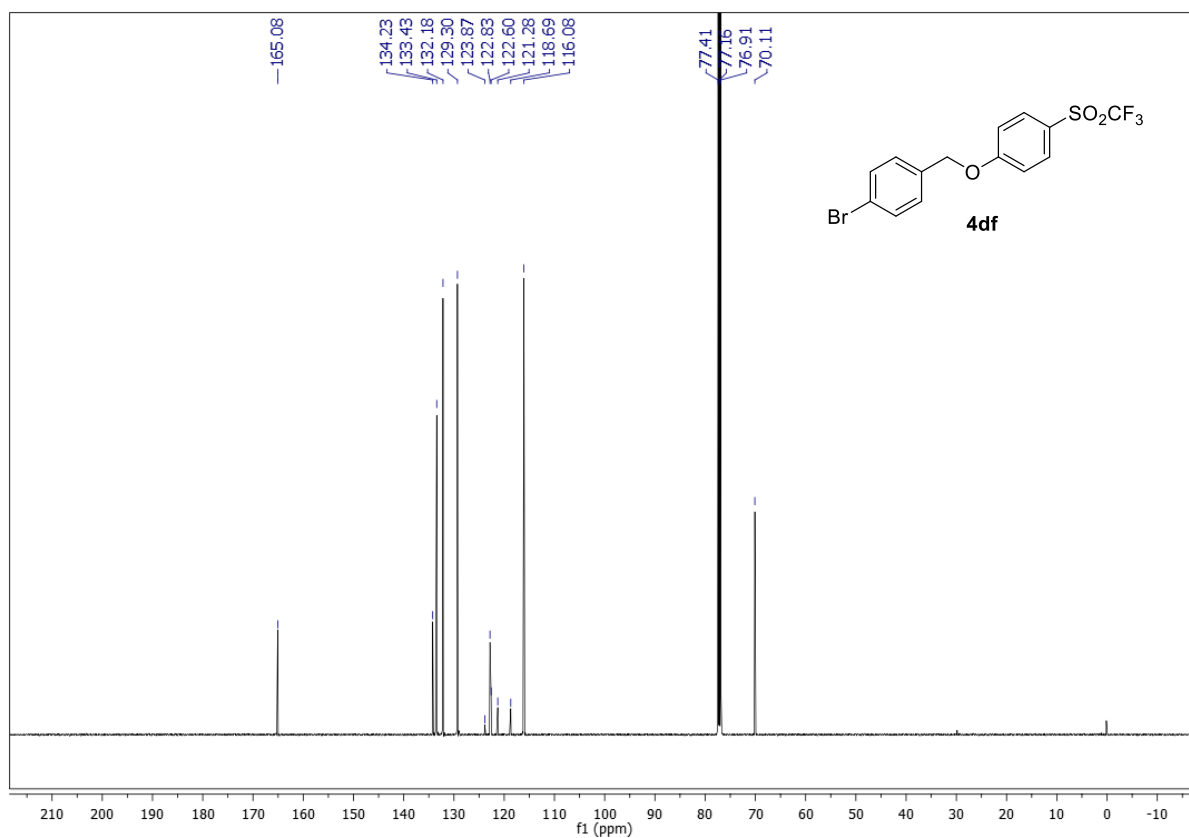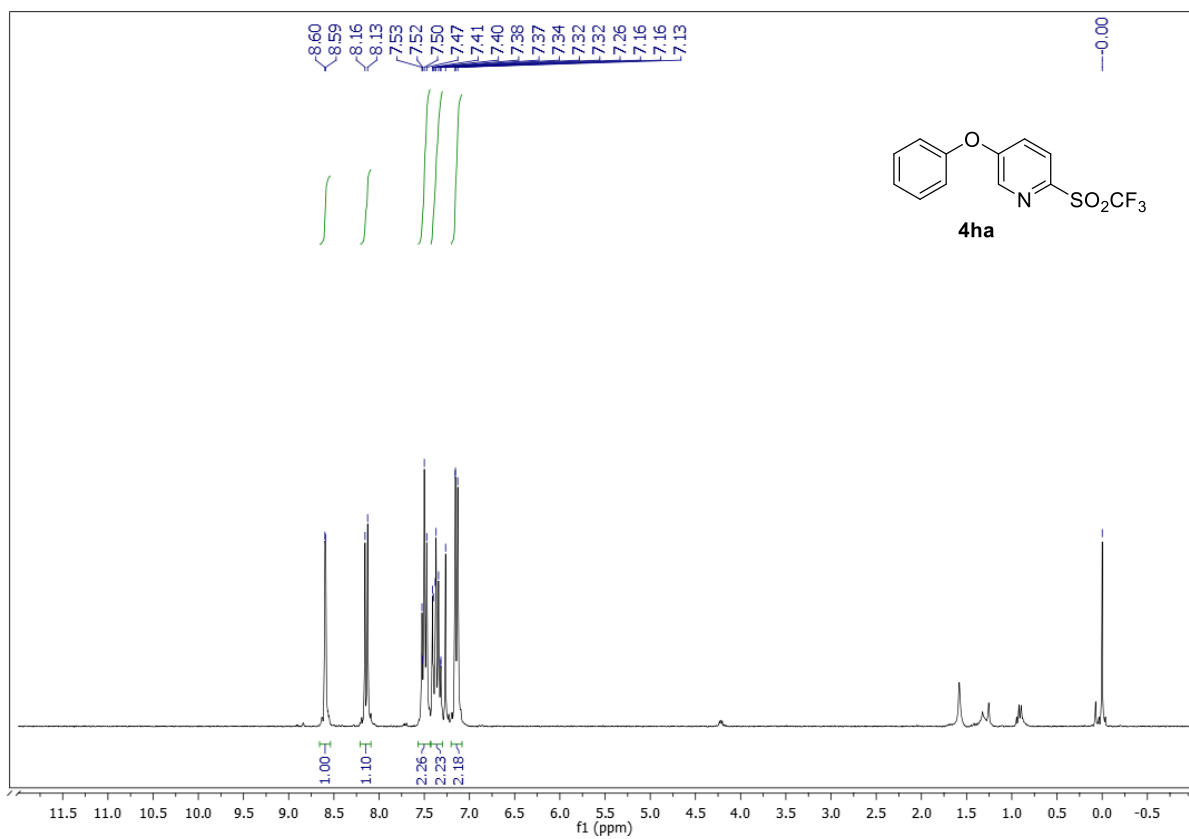

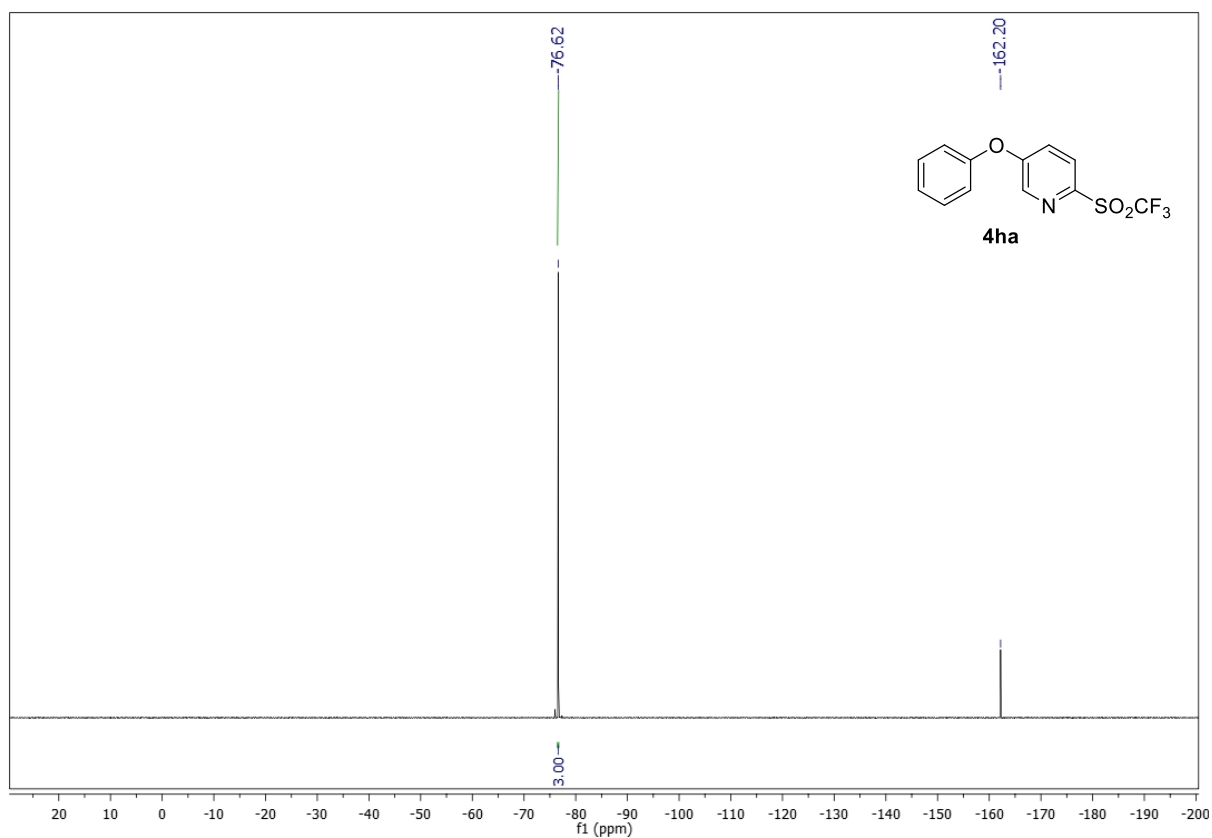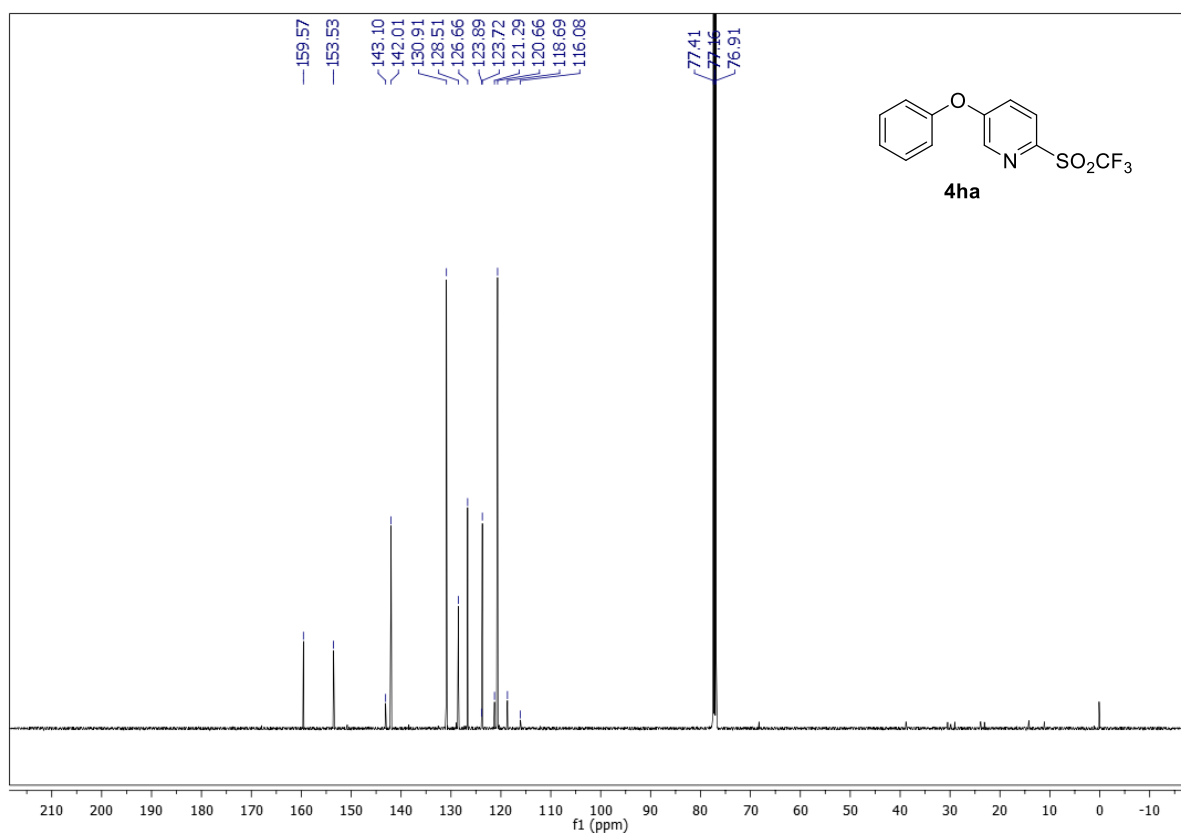

Supplement: Supplementary file 1 [file 9264571]
